# Supplementary material for: Iminyl radical initiated sulfonylation of alkenes with rongalite under photoredox conditions
Source: Royal Society of Chemistry journal article supplement (doi:10.1039/d1qo00556a), 2021-01-01

# **Iminyl radical initiated sulfonylation of alkenes with rongalite under photoredox conditions**

Fu-Sheng He,<sup>\*a</sup> Man Zhang,<sup>a</sup> Mengke Zhang,<sup>a</sup> Xiangxiang Luo,<sup>a</sup> and Jie Wu<sup>\*a,b,c</sup>

<sup>a</sup> *School of Pharmaceutical and Materials Engineering & Institute for Advanced Studies, Taizhou University, 1139 Shifu Avenue, Taizhou 318000, China*

<sup>b</sup> *State Key Laboratory of Organometallic Chemistry, Shanghai Institute of Organic Chemistry, Chinese Academy of Sciences, 345 Lingling Road, Shanghai 200032, China*

<sup>c</sup> *School of Chemistry and Chemical Engineering, Henan Normal University, 46 East Jianshe Road, Xinxiang 453007, China*

## **Supporting Information**

1. General experimental method (S2)
2. General experimental procedure (S3-S4)
3. Radical trapping experiment (S5)
4. Characterization data of compounds (S6-S12)
5. <sup>1</sup>H NMR and <sup>13</sup>C NMR spectra of compounds (S13-S48)

**General experimental methods:**

Unless otherwise stated, all commercial reagents were used as received. All solvents were dried and distilled according to standard procedures. Flash column chromatography was performed using silica gel (60-Å pore size, 32-63µm, standard grade). Analytical thin-layer chromatography was performed using glass plates pre-coated with 0.25 mm 230-400 mesh silica gel impregnated with a fluorescent indicator (254 nm). Thin layer chromatography plates were visualized by exposure to ultraviolet light. Organic solutions were concentrated on rotary evaporators at ~20 Torr at 25-35 °C. Nuclear magnetic resonance (NMR) spectra are recorded in parts per million from internal tetramethylsilane on the  $\delta$  scale.  $^1\text{H}$  NMR and  $^{13}\text{C}$  NMR spectra were recorded in  $\text{CDCl}_3$  on a Bruker DRX - 400 spectrometer operating at 400 MHz and 100 MHz respectively. All chemical shift values are quoted in ppm and coupling constants quoted in Hz. High resolution mass spectrometry (HRMS) spectra were obtained on a micrOTOF II Instrument.

General experimental procedure for the visible-light-induced sulfonation of *O*-(2,4-dinitrophenyl) oxime **1**, rongalite and alkyl iodides/bromides **2**.

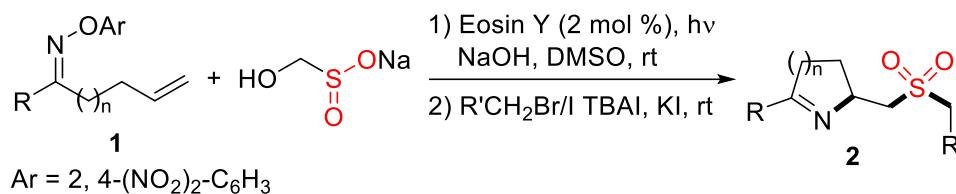

A dry tube was charged with oxime (**1**, 0.2 mmol), rongalite (0.3 mmol), NaOH (0.4 mmol) and Eosin Y (2 mol %), sealed with a rubber stopper, evacuated and backfilled with argon for four times before the addition of DMSO (3.0 mL) *via* a syringe. The mixture was stirred and irradiated with a commercially available 35 W CFL for 24 h. Subsequently, TBAI (0.02 mmol, 7.4 mg), KI (0.24 mmol, 40.0 mg) and alkyl iodide/bromide (0.4 mmol) were added to the reaction before the tube was evacuated and backfilled with argon three times and stirred at room temperature for another 12 h. After completion of the reaction as indicated by TLC, the mixture was quenched with saturated brine. The mixture was extracted with ethyl acetate (20 mL x 3). The organic phases were combined and dried over anhydrous Na<sub>2</sub>SO<sub>4</sub>. The solvent was evaporated *in vacuo*, and purified by flash column chromatography (EtOAc/*n*-hexane, 1:3) to give the desired product **2**.

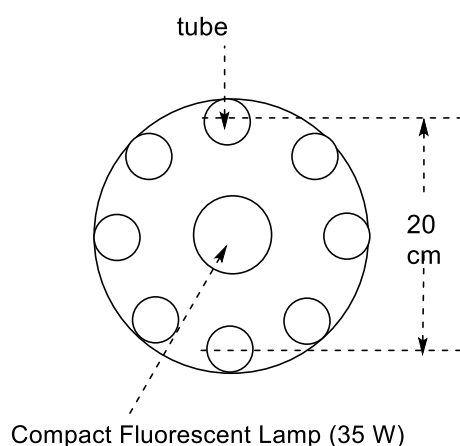

General experimental procedure for the aminosulfonylation of 1-(*p*-tolyl)pent-4-en-1-one *O*-(2,4-dinitrophenyl) oxime **1a** with rongalite and amines

**3.**

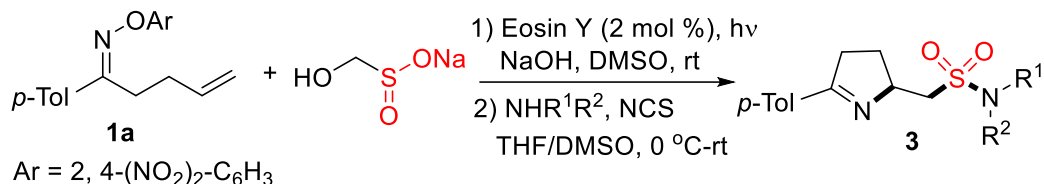

A dry tube was charged with (*E*)-1-(*p*-tolyl)pent-4-en-1-one *O*-(2,4-dinitrophenyl) oxime **1a** (0.2 mmol), rongalite (0.3 mmol), NaOH (0.4 mmol), Eosin Y (2 mol %), sealed with a rubber stopper, evacuated and backfilled with argon for four times before the addition of DMSO (3.0 mL) *via* a syringe. The mixture was stirred and irradiated with a commercially available 35 W CFL for 24 h. Subsequently, THF (8 mL), triethylamine (0.4 mmol) and amine (0.4 mmol) were added to the mixture *via* a syringe, followed by dropwise addition of *N*-chlorosuccinimide (0.3 mmol, dissolved in THF) at 0 °C in 30 minutes. The reaction mixture was warmed to room temperature and stirred for 2 hours. After completion of the reaction as indicated by TLC, the mixture was quenched with saturated brine. The mixture was extracted with ethyl acetate (20 mL x 3). The organic phases were combined and dried over anhydrous Na<sub>2</sub>SO<sub>4</sub>. The solvent was evaporated *in vacuo*, and purified by flash column chromatography (EtOAc/*n*-hexane, 1:4) to give the desired product **3**.

### Radical trapping experiment

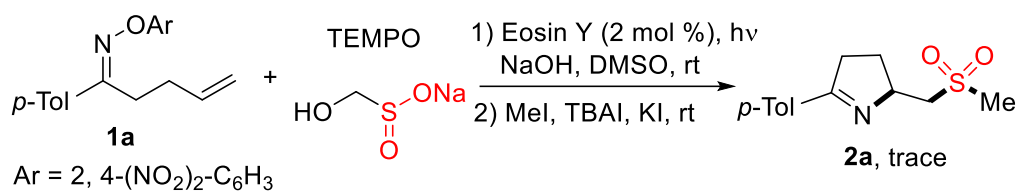

A dry tube was charged with 1-(*p*-tolyl)pent-4-en-1-one *O*-(2,4-dinitrophenyl) oxime **1a** (0.2 mmol), rongalite (0.3 mmol), NaOH (0.4 mmol), Eosin Y (2 mol %) and TEMPO (0.4 mmol), sealed with a rubber stopper, evacuated and backfilled with argon for four times before the addition of DMSO (3.0 mL) *via* a syringe. The mixture was stirred and irradiated with a commercially available 35 W CFL for 24 h. Subsequently, TBAI (0.02 mmol, 7.4 mg), KI (0.24 mmol, 40.0 mg) and iodomethane (0.4 mmol) were added to the reaction before the tube was evacuated and backfilled with argon three times and stirred at room temperature for another 12 h. As indicated by TLC, only a trace amount of product **2a** was detected.

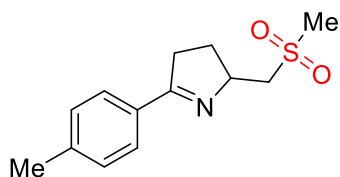

2-((Methylsulfonyl)methyl)-5-(*p*-tolyl)-3,4-dihydro-2*H*-pyrrole (**2a**)

White solid, 80% yield;  $^1\text{H}$  NMR (400 MHz,  $\text{CDCl}_3$ )  $\delta$  (ppm) 7.72 (d,  $J = 8.1$  Hz, 2H), 7.22 (d,  $J = 8.0$  Hz, 2H), 4.71 – 4.63 (m, 1H), 3.35 (dd,  $J = 14.3, 8.6$  Hz, 1H), 3.23 (d,  $J = 4.9$  Hz, 1H), 3.20 (s, 3H), 3.15 – 3.06 (m, 1H), 2.97 – 2.87 (m, 1H), 2.48 – 2.41 (m, 1H), 2.40 (s, 3H), 1.83 – 1.73 (m, 1H);  $^{13}\text{C}$  NMR (101 MHz,  $\text{CDCl}_3$ )  $\delta$  (ppm) 174.1, 141.4, 131.0, 129.2, 127.8, 67.4, 60.6, 42.9, 34.9, 28.9, 21.5. HRMS calcd for  $\text{C}_{13}\text{H}_{18}\text{NO}_2\text{S}^+$  ( $\text{M}+\text{H}^+$ ): 252.1053, found: 252.1058.

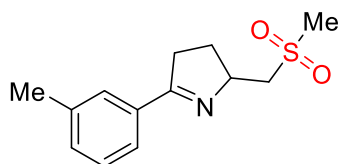

2-((Methylsulfonyl)methyl)-5-(*m*-tolyl)-3,4-dihydro-2*H*-pyrrole (**2b**)

White solid, 65% yield;  $^1\text{H}$  NMR (400 MHz,  $\text{CDCl}_3$ )  $\delta$  (ppm) 7.65 (s, 1H), 7.61 (d,  $J = 7.1$  Hz, 1H), 7.34 – 7.26 (m, 2H), 4.70 – 4.65 (m, 1H), 3.38 (dd,  $J = 14.5, 8.4$  Hz, 1H), 3.25 – 3.19 (m, 4H), 3.17 – 3.08 (m, 1H), 2.99 – 2.88 (m, 1H), 2.49 – 2.41 (m, 1H), 2.40 (s, 3H), 1.85 – 1.75 (m, 1H);  $^{13}\text{C}$  NMR (101 MHz,  $\text{CDCl}_3$ )  $\delta$  174.5, 138.3, 133.6, 131.9, 128.5, 128.3, 125.0, 67.5, 60.6, 42.8, 35.1, 28.9, 21.4. HRMS calcd for  $\text{C}_{13}\text{H}_{18}\text{NO}_2\text{S}^+$  ( $\text{M}+\text{H}^+$ ): 252.1053, found: 252.1053.

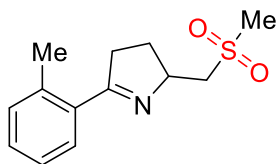

2-((Methylsulfonyl)methyl)-5-(*o*-tolyl)-3,4-dihydro-2*H*-pyrrole (**2c**)

White solid, 68% yield;  $^1\text{H}$  NMR (400 MHz,  $\text{CDCl}_3$ )  $\delta$  (ppm) 7.47 (d,  $J = 7.8$  Hz, 1H), 7.34 – 7.29 (m, 1H), 7.24 (d,  $J = 7.4$  Hz, 2H), 4.74 – 4.66 (m, 1H), 3.39 (dd,  $J = 14.5, 9.0$  Hz, 1H), 3.25 – 3.19 (m, 1H), 3.17 (d,  $J = 0.9$  Hz, 3H), 3.13 – 3.04 (m, 1H), 3.01 – 2.91 (m, 1H), 2.53 (s, 3H), 2.46 – 2.36 (m, 1H), 1.75 – 1.64 (m, 1H);  $^{13}\text{C}$  NMR (101 MHz,

CDCl<sub>3</sub>)  $\delta$  (ppm) 175.9, 137.6, 133.5, 131.6, 129.7, 129.3, 125.8, 68.2, 60.9, 42.5, 38.1, 29.1, 22.3; HRMS calcd for C<sub>13</sub>H<sub>18</sub>NO<sub>2</sub>S<sup>+</sup> (M+H<sup>+</sup>): 252.1053, found: 252.1060.

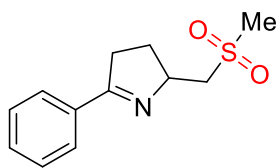

**2-((Methylsulfonyl)methyl)-5-phenyl-3,4-dihydro-2H-pyrrole (2d)**

White solid, 73% yield; <sup>1</sup>H NMR (400 MHz, CDCl<sub>3</sub>)  $\delta$  (ppm) 7.83 (d, *J* = 6.8 Hz, 2H), 7.49 – 7.40 (m, 3H), 4.74 – 4.65 (m, 1H), 3.37 (dd, *J* = 14.5, 8.6 Hz, 1H), 3.24 (d, *J* = 4.8 Hz, 1H), 3.21 (s, 3H), 3.18 – 3.09 (m, 1H), 3.01 – 2.90 (m, 1H), 2.50 – 2.41 (m, 1H), 1.85 – 1.74 (m, 1H); <sup>13</sup>C NMR (101 MHz, CDCl<sub>3</sub>)  $\delta$  (ppm) 174.3, 133.6, 131.1, 128.6, 127.8, 67.5, 60.6, 42.9, 35.0, 28.9; HRMS calcd for C<sub>12</sub>H<sub>16</sub>NO<sub>2</sub>S<sup>+</sup> (M+H<sup>+</sup>): 238.0896, found: 238.0906.

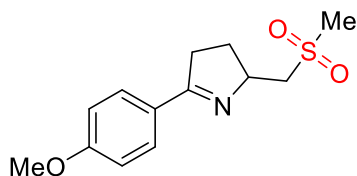

**5-(4-Methoxyphenyl)-2-((methylsulfonyl)methyl)-3,4-dihydro-2H-pyrrole (2e)**

White solid, 86% yield; <sup>1</sup>H NMR (400 MHz, CDCl<sub>3</sub>)  $\delta$  (ppm) 7.79 (d, *J* = 8.8 Hz, 2H), 6.93 (d, *J* = 8.8 Hz, 2H), 4.70 – 4.62 (m, 1H), 3.86 (s, 3H), 3.37 (dd, *J* = 14.4, 8.5 Hz, 1H), 3.23 (d, *J* = 4.9 Hz, 1H), 3.20 (s, 3H), 3.14 – 3.04 (m, 1H), 2.96 – 2.87 (m, 1H), 2.48 – 2.39 (m, 1H), 1.83 – 1.72 (m, 1H); <sup>13</sup>C NMR (101 MHz, CDCl<sub>3</sub>)  $\delta$  (ppm) 173.8, 162.1, 129.7, 126.1, 113.9, 67.1, 60.5, 55.4, 42.9, 34.8, 28.9; HRMS calcd for C<sub>13</sub>H<sub>18</sub>NO<sub>3</sub>S<sup>+</sup> (M+H<sup>+</sup>): 268.1002, found: 268.1008.

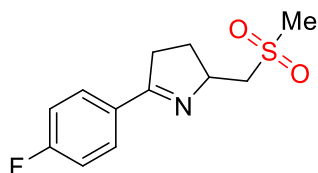

**5-(4-Fluorophenyl)-2-((methylsulfonyl)methyl)-3,4-dihydro-2H-pyrrole (2f)**

White solid, 60% yield; <sup>1</sup>H NMR (400 MHz, CDCl<sub>3</sub>)  $\delta$  (ppm) 7.86 – 7.80 (m, 2H), 7.13 – 7.07 (m, 2H), 4.72 – 4.62 (m, 1H), 3.36 (dd, *J* = 14.6, 8.9 Hz, 1H), 3.24 (dd, *J* = 4.9, 0.9 Hz, 1H), 3.20 (s, 3H), 3.15 – 3.06 (m, 1H), 2.97 – 2.87 (m, 1H), 2.50 – 2.41 (m, 1H),

1.85 – 1.74 (m, 1H);  $^{13}\text{C}$  NMR (101 MHz,  $\text{CDCl}_3$ )  $\delta$  173.0, 164.4 (d,  $J = 251.6$  Hz), 123.0 (d,  $J = 3.1$  Hz), 129.9 (d,  $J = 8.7$  Hz), 115.6 (d,  $J = 21.8$  Hz), 67.5, 60.5, 42.8, 35.0, 29.0; HRMS calcd for  $\text{C}_{12}\text{H}_{15}\text{FNO}_2\text{S}^+$  ( $\text{M}+\text{H}^+$ ): 256.0802, found: 256.0808.

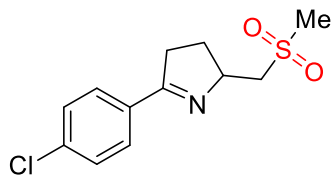

5-(4-Chlorophenyl)-2-((methylsulfonyl)methyl)-3,4-dihydro-2H-pyrrole (**2g**)

White solid, 68% yield;  $^1\text{H}$  NMR (400 MHz,  $\text{CDCl}_3$ )  $\delta$  (ppm) 7.78 – 7.74 (m, 2H), 7.41 – 7.38 (m, 2H), 4.73 – 4.64 (m, 1H), 3.36 (dd,  $J = 14.3, 8.5$  Hz, 1H), 3.25 – 3.19 (m, 1H), 3.19 (s, 3H), 3.14 – 3.05 (m, 1H), 2.97 – 2.86 (m, 1H), 2.51 – 2.41 (m, 1H), 1.85 – 1.74 (m, 1H);  $^{13}\text{C}$  NMR (101 MHz,  $\text{CDCl}_3$ )  $\delta$  (ppm) 173.2, 137.2, 132.1, 129.1, 128.8, 67.6, 60.5, 42.8, 35.0, 29.0; HRMS calcd for  $\text{C}_{12}\text{H}_{15}\text{ClNO}_2\text{S}^+$  ( $\text{M}+\text{H}^+$ ): 272.0507, found: 272.0515.

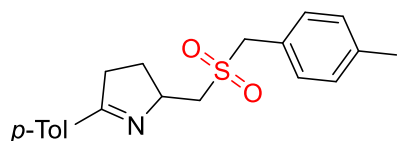

2-(((4-Methylbenzyl)sulfonyl)methyl)-5-(*p*-tolyl)-3,4-dihydro-2H-pyrrole (**2i**)

White solid, 85% yield;  $^1\text{H}$  NMR (400 MHz,  $\text{CDCl}_3$ )  $\delta$  (ppm) 7.78 (d,  $J = 8.1$  Hz, 2H), 7.35 (d,  $J = 8.0$  Hz, 2H), 7.24 (d,  $J = 8.0$  Hz, 2H), 7.15 (d,  $J = 7.9$  Hz, 2H), 4.76 (d,  $J = 13.9$  Hz, 1H), 4.73 – 4.67 (m, 1H), 4.41 (d,  $J = 13.9$  Hz, 1H), 3.31 (dd,  $J = 14.5, 8.2$  Hz, 1H), 3.16 – 3.07 (m, 2H), 3.01 – 2.87 (m, 1H), 2.46 – 2.37 (m, 4H), 2.33 (s, 3H), 1.81 – 1.70 (m, 1H);  $^{13}\text{C}$  NMR (101 MHz,  $\text{CDCl}_3$ )  $\delta$  (ppm) 174.2, 141.5, 138.7, 131.0, 130.8, 129.6, 129.3, 127.9, 125.5, 67.3, 60.3, 56.3, 35.0, 28.9, 21.5, 21.2; HRMS calcd for  $\text{C}_{20}\text{H}_{24}\text{NO}_2\text{S}^+$  ( $\text{M}+\text{H}^+$ ): 342.1522, found: 342.1535.

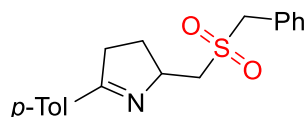

2-((Benzylsulfonyl)methyl)-5-(*p*-tolyl)-3,4-dihydro-2H-pyrrole (**2j**)

White solid, 65% yield;  $^1\text{H}$  NMR (400 MHz,  $\text{CDCl}_3$ )  $\delta$  (ppm) 7.77 (d,  $J = 8.1$  Hz, 2H), 7.48 – 7.45 (m, 2H), 7.36 – 7.32 (m, 3H), 7.24 (d,  $J = 7.9$  Hz, 2H), 4.81 (d,  $J = 13.8$  Hz, 1H), 4.75 – 4.67 (m, 1H), 4.46 (d,  $J = 13.8$  Hz, 1H), 3.30 (dd,  $J = 14.5, 8.4$  Hz, 1H), 3.15



– 3.07 (m, 1H), 3.02 – 2.86 (m, 2H), 2.46 – 2.36 (m, 4H), 1.80 – 1.70 (m, 1H); <sup>13</sup>C NMR (101 MHz, CDCl<sub>3</sub>) δ (ppm) 174.2, 141.4, 131.1, 131.0, 129.3, 128.9, 128.8, 128.6, 127.8, 67.4, 60.6, 56.5, 35.0, 29.0, 21.5; HRMS calcd for C<sub>19</sub>H<sub>22</sub>NO<sub>2</sub>S<sup>+</sup> (M+H<sup>+</sup>): 328.1366, found: 328.1373.

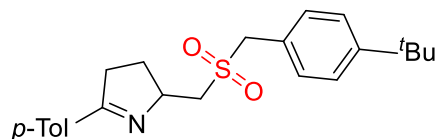

2-(((4-(*tert*-Butyl)benzyl)sulfonyl)methyl)-5-(*p*-tolyl)-3,4-dihydro-2*H*-pyrrole (**2k**)

White solid, 83% yield; <sup>1</sup>H NMR (400 MHz, CDCl<sub>3</sub>) δ (ppm) 7.77 (d, *J* = 8.1 Hz, 2H), 7.39 (d, *J* = 8.5 Hz, 2H), 7.36 (d, *J* = 8.6 Hz, 2H), 7.23 (d, *J* = 7.9 Hz, 2H), 4.79 (d, *J* = 13.9 Hz, 1H), 4.75 – 4.66 (m, 1H), 4.42 (d, *J* = 13.9 Hz, 1H), 3.33 (dd, *J* = 14.5, 8.3 Hz, 1H), 3.16 – 3.07 (m, 1H), 3.01 – 2.87 (m, 2H), 2.47 – 2.37 (m, 4H), 1.81 – 1.70 (m, 1H), 1.30 (s, 9H); <sup>13</sup>C NMR (101 MHz, CDCl<sub>3</sub>) δ (ppm) 174.1, 151.8, 141.4, 131.1, 130.7, 129.3, 127.8, 125.9, 125.5, 67.4, 60.2, 56.4, 35.0, 34.6, 31.2, 29.0, 21.5; HRMS calcd for C<sub>23</sub>H<sub>30</sub>NO<sub>2</sub>S<sup>+</sup> (M+H<sup>+</sup>): 384.1992, found: 384.1998.

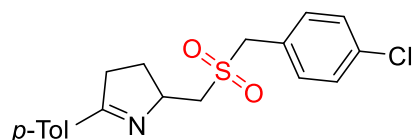

2-(((4-Chlorobenzyl)sulfonyl)methyl)-5-(*p*-tolyl)-3,4-dihydro-2*H*-pyrrole (**2l**)

White solid, 71% yield; <sup>1</sup>H NMR (400 MHz, CDCl<sub>3</sub>) δ (ppm) 7.77 (d, *J* = 8.1 Hz, 2H), 7.41 (d, *J* = 8.4 Hz, 2H), 7.30 (d, *J* = 8.4 Hz, 2H), 7.24 (d, *J* = 8.0 Hz, 2H), 4.82 (d, *J* = 13.9 Hz, 1H), 4.75 – 4.66 (m, 1H), 4.44 (d, *J* = 13.8 Hz, 1H), 3.22 (dd, *J* = 14.6, 8.9 Hz, 1H), 3.17 – 3.08 (m, 1H), 3.01 (ddd, *J* = 14.6, 4.5, 1.0 Hz, 1H), 2.95 – 2.86 (m, 1H), 2.45 – 2.36 (m, 4H), 1.78 – 1.67 (m, 1H); <sup>13</sup>C NMR (101 MHz, CDCl<sub>3</sub>) δ 174.3, 141.5, 135.0, 132.3, 131.0, 129.4, 129.0, 127.8, 127.1, 67.5, 59.8, 56.7, 34.9, 28.9, 21.5; HRMS calcd for C<sub>19</sub>H<sub>21</sub>ClNO<sub>2</sub>S<sup>+</sup> (M+H<sup>+</sup>): 362.0976, found: 362.0983.

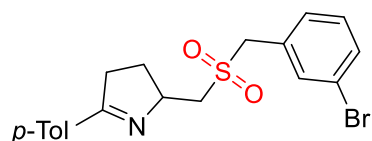

2-(((3-Bromobenzyl)sulfonyl)methyl)-5-(*p*-tolyl)-3,4-dihydro-2*H*-pyrrole (**2m**)

White solid, 62% yield;  $^1\text{H}$  NMR (400 MHz,  $\text{CDCl}_3$ )  $\delta$  (ppm) 7.77 (d,  $J = 8.1$  Hz, 2H), 7.65 (s, 1H), 7.48 (d,  $J = 8.0$  Hz, 1H), 7.42 (d,  $J = 7.7$  Hz, 1H), 7.25 (d,  $J = 9.4$  Hz, 2H), 7.20 (t,  $J = 7.9$  Hz, 1H), 4.79 (d,  $J = 13.8$  Hz, 1H), 4.76 – 4.69 (m, 1H), 4.44 (d,  $J = 13.8$  Hz, 1H), 3.25 (dd,  $J = 14.6, 8.9$  Hz, 1H), 3.17 – 3.09 (m, 1H), 3.04 (ddd,  $J = 14.6, 4.4, 1.1$  Hz, 1H), 2.96 – 2.87 (m, 1H), 2.47 – 2.37 (m, 4H), 1.80 – 1.65 (m, 1H);  $^{13}\text{C}$  NMR (101 MHz,  $\text{CDCl}_3$ )  $\delta$  (ppm) 174.3, 141.5, 134.0, 131.9, 131.0, 130.8, 130.3, 129.6, 129.4, 127.8, 122.7, 67.5, 59.8, 57.0, 35.0, 29.0, 21.5; HRMS calcd for  $\text{C}_{19}\text{H}_{21}\text{BrNO}_2\text{S}^+$  ( $\text{M}+\text{H}^+$ ): 406.0471, found: 406.0483.

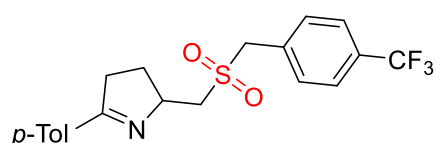

5-(*p*-Tolyl)-2-(((4-(trifluoromethyl)benzyl)sulfonyl)methyl)-3,4-dihydro-2*H*-pyrrole  
**(2n)**

White solid, 52% yield;  $^1\text{H}$  NMR (400 MHz,  $\text{CDCl}_3$ )  $\delta$  (ppm) 7.78 (d,  $J = 8.1$  Hz, 2H), 7.63 – 7.57 (m, 4H), 7.25 (d,  $J = 7.2$  Hz, 2H), 4.94 (d,  $J = 13.7$  Hz, 1H), 4.76 – 4.69 (m, 1H), 4.55 (d,  $J = 13.7$  Hz, 1H), 3.22 (dd,  $J = 14.7, 9.1$  Hz, 1H), 3.18 – 3.10 (m, 1H), 3.09 – 3.03 (m, 1H), 2.97 – 2.87 (m, 1H), 2.47 – 2.38 (m, 4H), 1.79 – 1.68 (m, 1H);  $^{13}\text{C}$  NMR (101 MHz,  $\text{CDCl}_3$ )  $\delta$  (ppm) 174.4, 141.7, 132.7 (d,  $J = 1.0$  Hz), 131.5, 131.1, 130.9, 129.5, 127.9, 125.8 (q,  $J = 3.7$  Hz), 123.9 (q,  $J = 272.3$  Hz), 67.5, 60.0, 57.1, 35.0, 28.9, 21.5; HRMS calcd for  $\text{C}_{20}\text{H}_{21}\text{F}_3\text{NO}_2\text{S}^+$  ( $\text{M}+\text{H}^+$ ): 396.1240, found: 396.1248.

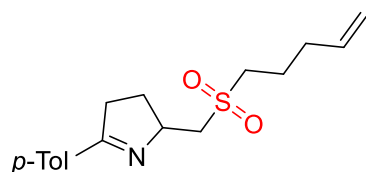

2-((Pent-4-en-1-ylsulfonyl)methyl)-5-(*p*-tolyl)-3,4-dihydro-2*H*-pyrrole (**2o**)

White solid, 60% yield;  $^1\text{H}$  NMR (400 MHz,  $\text{CDCl}_3$ )  $\delta$  (ppm) 7.71 (d,  $J = 8.0$  Hz, 2H), 7.22 (d,  $J = 8.0$  Hz, 2H), 5.84 – 5.73 (m, 1H), 5.07 (t,  $J = 12.4$  Hz, 2H), 4.70 – 4.61 (m, 1H), 3.42 – 3.26 (m, 3H), 3.15 – 3.06 (m, 2H), 2.96 – 2.86 (m, 1H), 2.48 – 2.41 (m, 1H), 2.40 (s, 3H), 2.28 – 2.20 (m, 2H), 2.08 – 1.92 (m, 2H), 1.83 – 1.72 (m, 1H);  $^{13}\text{C}$  NMR (101 MHz,  $\text{CDCl}_3$ )  $\delta$  (ppm) 174.1, 141.4, 136.6, 131.0, 129.2, 127.8, 116.4, 67.3, 58.6,

53.9, 35.0, 32.4, 29.1, 21.5, 21.3; HRMS calcd for  $C_{17}H_{24}NO_2S^+$  ( $M+H^+$ ): 306.1522, found: 306.1533.

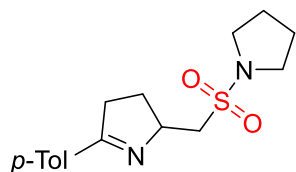

2-((Pyrrolidin-1-ylsulfonyl)methyl)-5-(*p*-tolyl)-3,4-dihydro-2*H*-pyrrole (**3a**)

Reddish solid, 70% yield;  $^1H$  NMR (400 MHz,  $CDCl_3$ )  $\delta$  (ppm) 7.71 (d,  $J = 8.1$  Hz, 2H), 7.22 (d,  $J = 7.9$  Hz, 2H), 4.64 (s, 1H), 3.66 (dd,  $J = 13.8, 4.7$  Hz, 1H), 3.50 – 3.37 (m, 4H), 3.16 – 3.07 (m, 1H), 3.04 – 2.89 (m, 2H), 2.51 – 2.43 (m, 1H), 2.39 (s, 3H), 1.97 – 1.94 (m, 5H);  $^{13}C$  NMR (101 MHz,  $CDCl_3$ )  $\delta$  (ppm) 174.3, 141.3, 131.1, 129.3, 127.8, 67.8, 54.4, 47.8, 35.4, 29.0, 25.9, 21.6; HRMS calcd for  $C_{16}H_{23}N_2O_2S^+$  ( $M+H^+$ ): 307.1475, found: 307.1483.

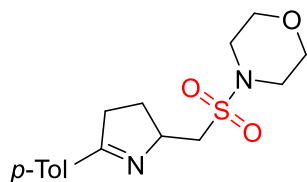

4-(((5-(*p*-Tolyl)-3,4-dihydro-2*H*-pyrrol-2-yl)methyl)sulfonyl)morpholine (**3b**)

Reddish solid, 63% yield;  $^1H$  NMR (400 MHz,  $CDCl_3$ )  $\delta$  (ppm) 7.73 (d,  $J = 8.1$  Hz, 2H), 7.23 (d,  $J = 7.9$  Hz, 2H), 4.66 – 4.57 (m, 1H), 3.78 (t,  $J = 4.7$  Hz, 4H), 3.56 (dd,  $J = 13.9, 5.4$  Hz, 1H), 3.44 – 3.32 (m, 4H), 3.16 – 3.07 (m, 1H), 3.03 – 2.89 (m, 2H), 2.51 – 2.41 (m, 1H), 2.39 (s, 3H), 1.94 – 1.83 (m, 1H);  $^{13}C$  NMR (101 MHz,  $CDCl_3$ )  $\delta$  (ppm) 174.3, 141.3, 131.1, 129.3, 127.8, 67.5, 66.7, 54.6, 45.7, 35.4, 29.1, 21.5; HRMS calcd for  $C_{16}H_{23}N_2O_3S^+$  ( $M+H^+$ ): 323.1424, found: 323.1430.

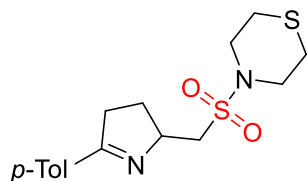

4-(((5-(*p*-Tolyl)-3,4-dihydro-2*H*-pyrrol-2-yl)methyl)sulfonyl)thiomorpholine (**3c**)

Reddish solid, 75% yield;  $^1H$  NMR (400 MHz,  $CDCl_3$ )  $\delta$  (ppm) 7.74 (d,  $J = 8.1$  Hz, 2H), 7.24 (d,  $J = 8.0$  Hz, 2H), 4.61 – 4.53 (m, 1H), 3.73 – 3.61 (m, 4H), 3.50 (dd,  $J = 13.9, 5.7$  Hz, 1H), 3.16 – 3.06 (m, 1H), 3.01 (dd,  $J = 14.0, 7.7$  Hz, 2H), 2.97 – 2.88 (m, 4H), 2.48 –

2.41 (m, 1H), 2.40 (s, 3H), 1.90 – 1.79 (m, 1H);  $^{13}\text{C}$  NMR (101 MHz,  $\text{CDCl}_3$ )  $\delta$  (ppm) 174.2, 141.3, 131.1, 129.3, 127.8, 67.5, 55.9, 47.6, 35.3, 29.1, 27.7, 21.5; HRMS calcd for  $\text{C}_{16}\text{H}_{23}\text{N}_2\text{O}_2\text{S}_2^+$  ( $\text{M}+\text{H}^+$ ): 339.1195, found: 339.1204.

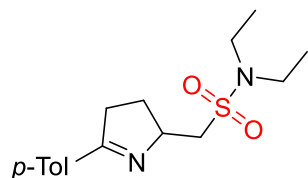

*N,N*-Diethyl-1-(5-(*p*-tolyl)-3,4-dihydro-2*H*-pyrrol-2-yl)methanesulfonamide (**3d**)

Reddish oil, 63% yield;  $^1\text{H}$  NMR (400 MHz,  $\text{CDCl}_3$ )  $\delta$  (ppm) 7.71 (d,  $J = 8.1$  Hz, 2H), 7.22 (d,  $J = 7.9$  Hz, 2H), 4.65 – 4.57 (m, 1H), 3.64 (dd,  $J = 13.7, 4.2$  Hz, 1H), 3.43 – 3.26 (m, 4H), 3.21 – 3.05 (m, 1H), 2.98 – 2.88 (m, 2H), 2.49 – 2.41 (m, 1H), 2.39 (s, 3H), 2.01 – 1.91 (m, 1H), 1.24 (t,  $J = 7.1$  Hz, 6H);  $^{13}\text{C}$  NMR (101 MHz,  $\text{CDCl}_3$ )  $\delta$  (ppm) 174.1, 141.1, 131.2, 129.2, 127.7, 68.0, 57.3, 41.9, 35.4, 28.9, 21.4, 14.6; HRMS calcd for  $\text{C}_{16}\text{H}_{25}\text{N}_2\text{O}_2\text{S}^+$  ( $\text{M}+\text{H}^+$ ): 309.1631, found: 309.1642.

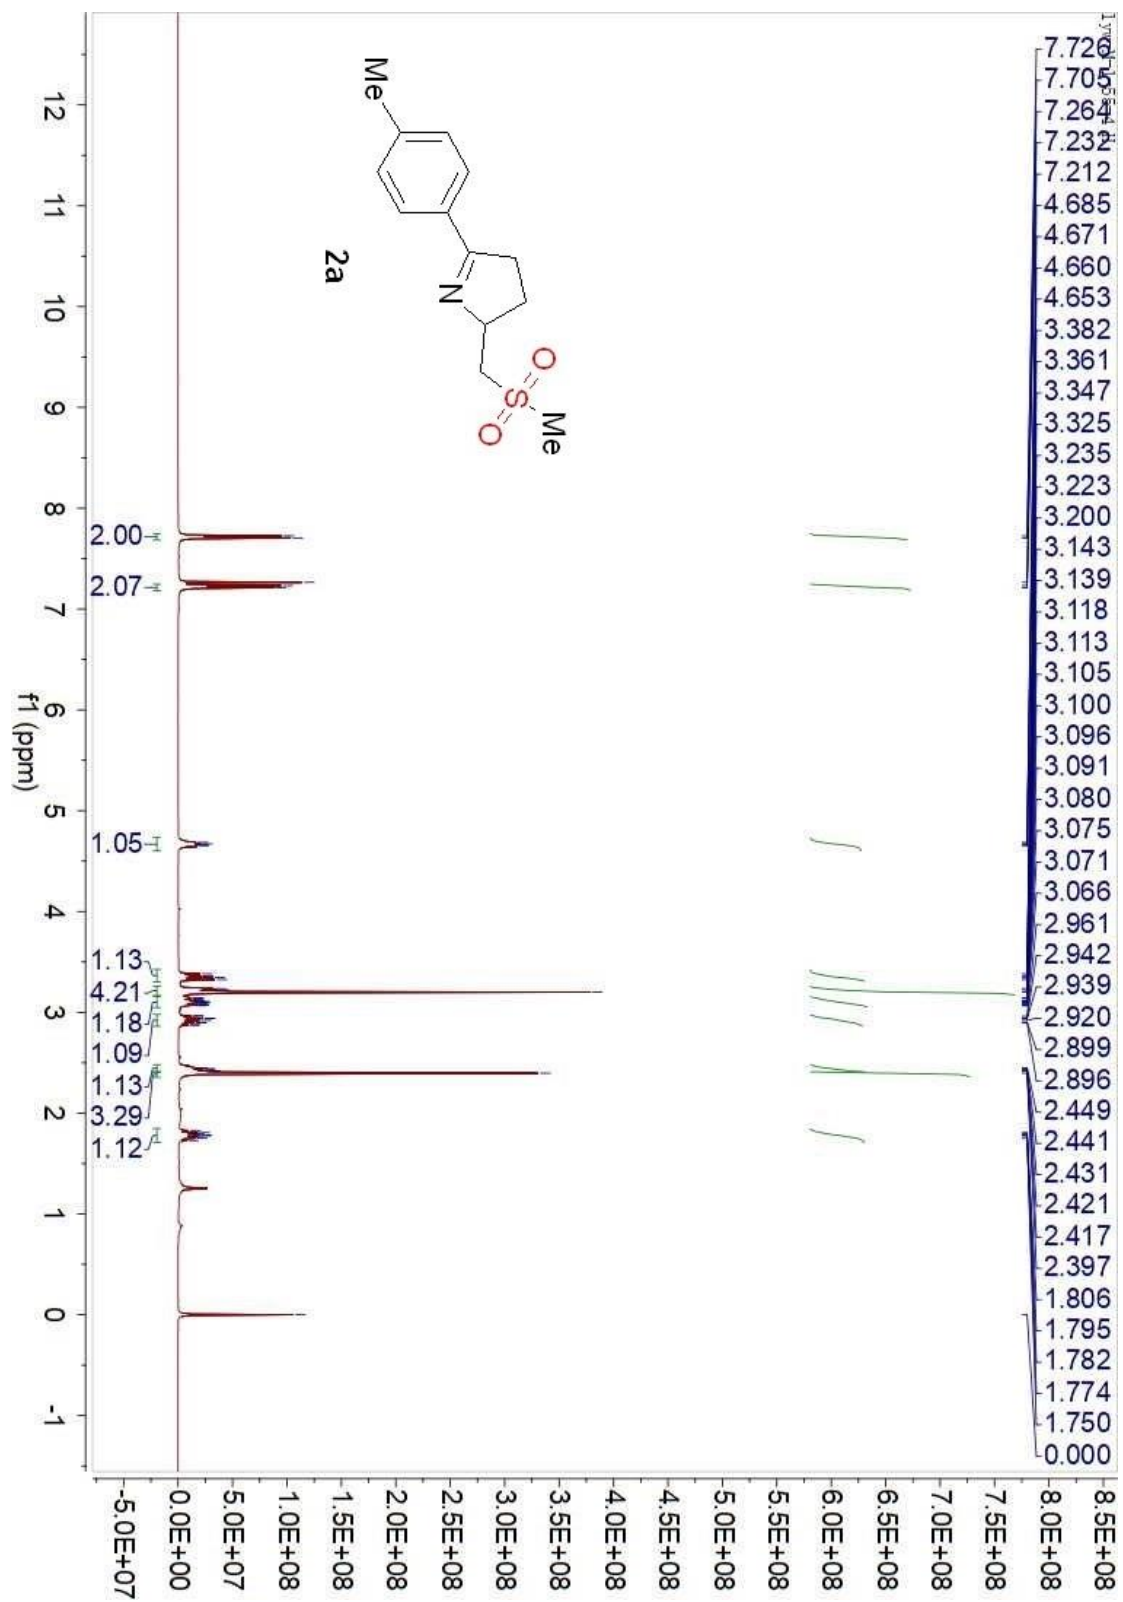

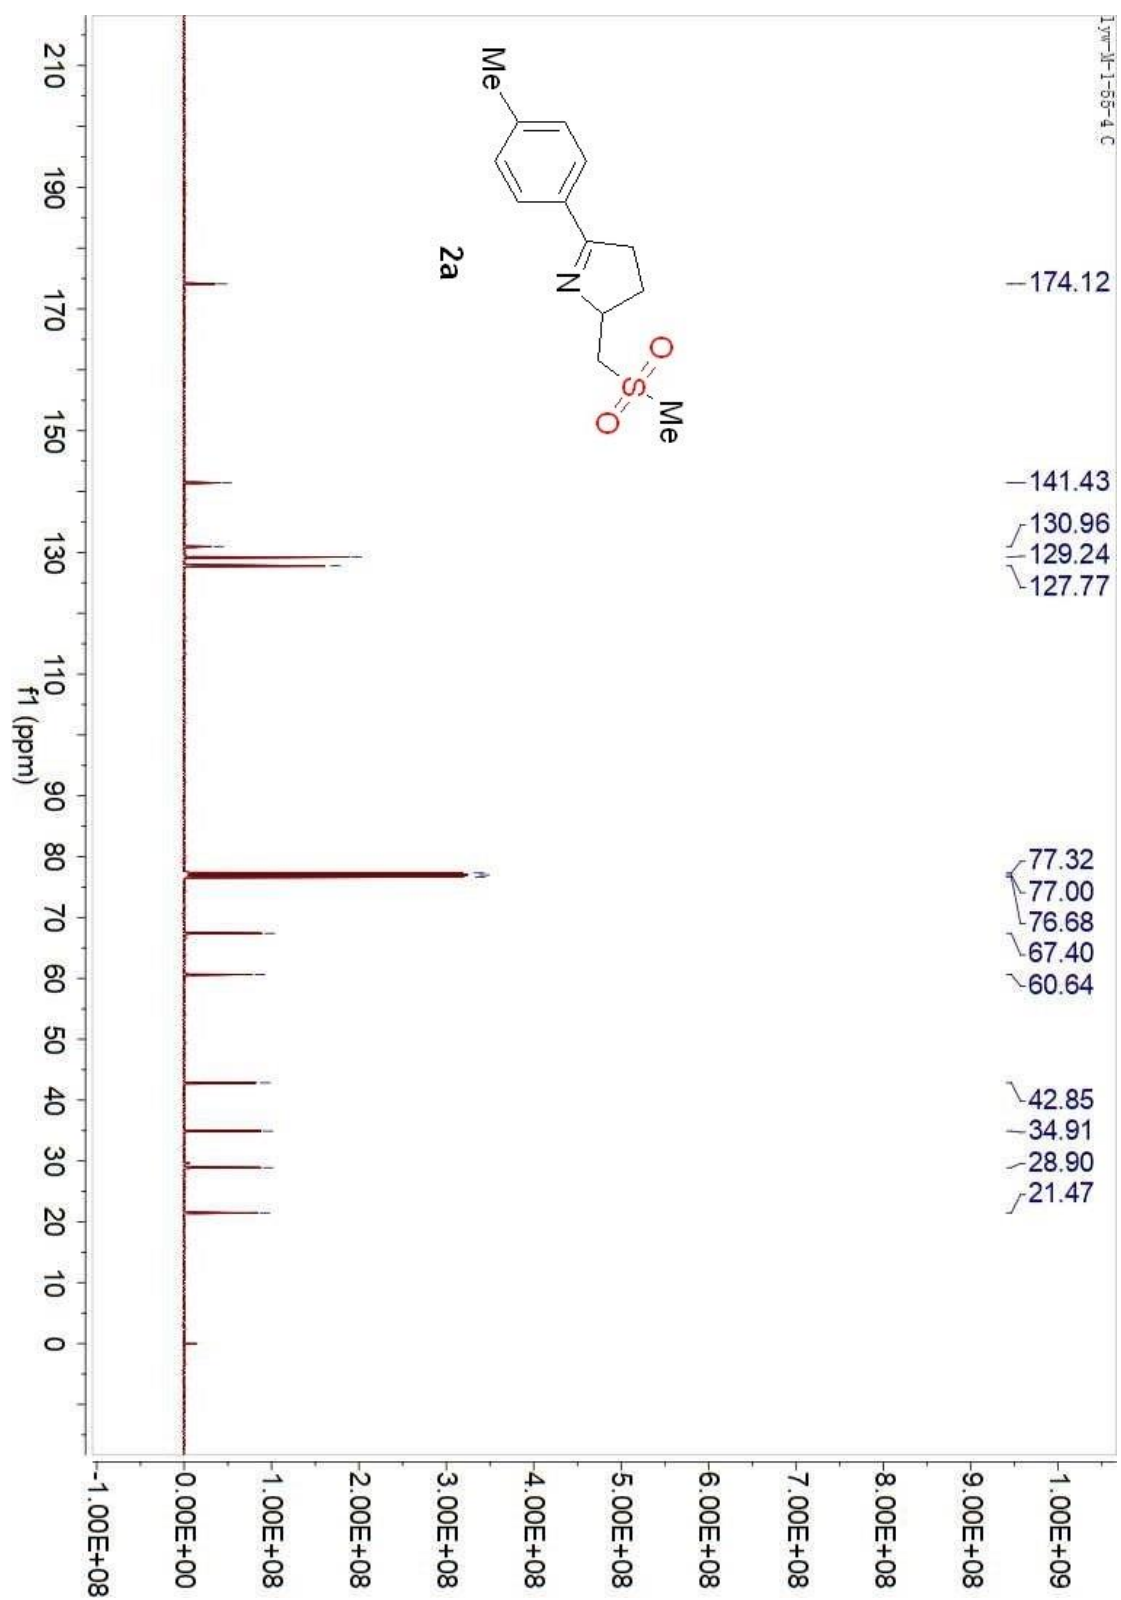

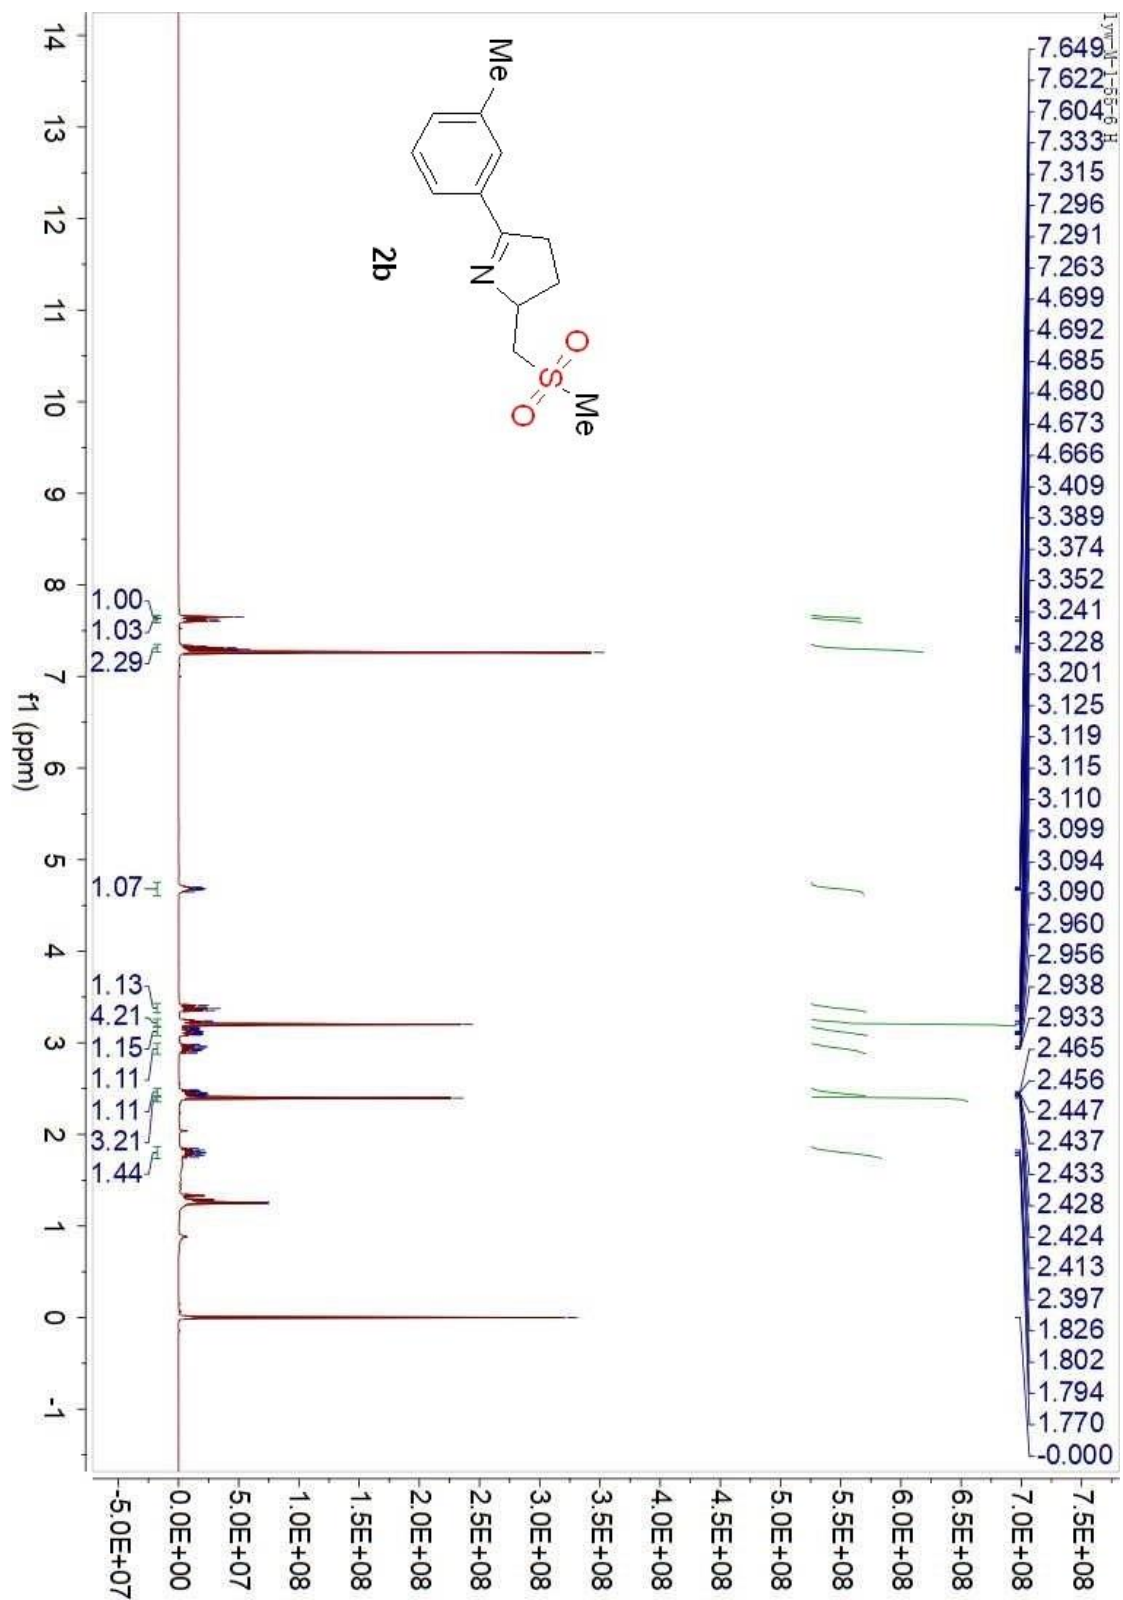

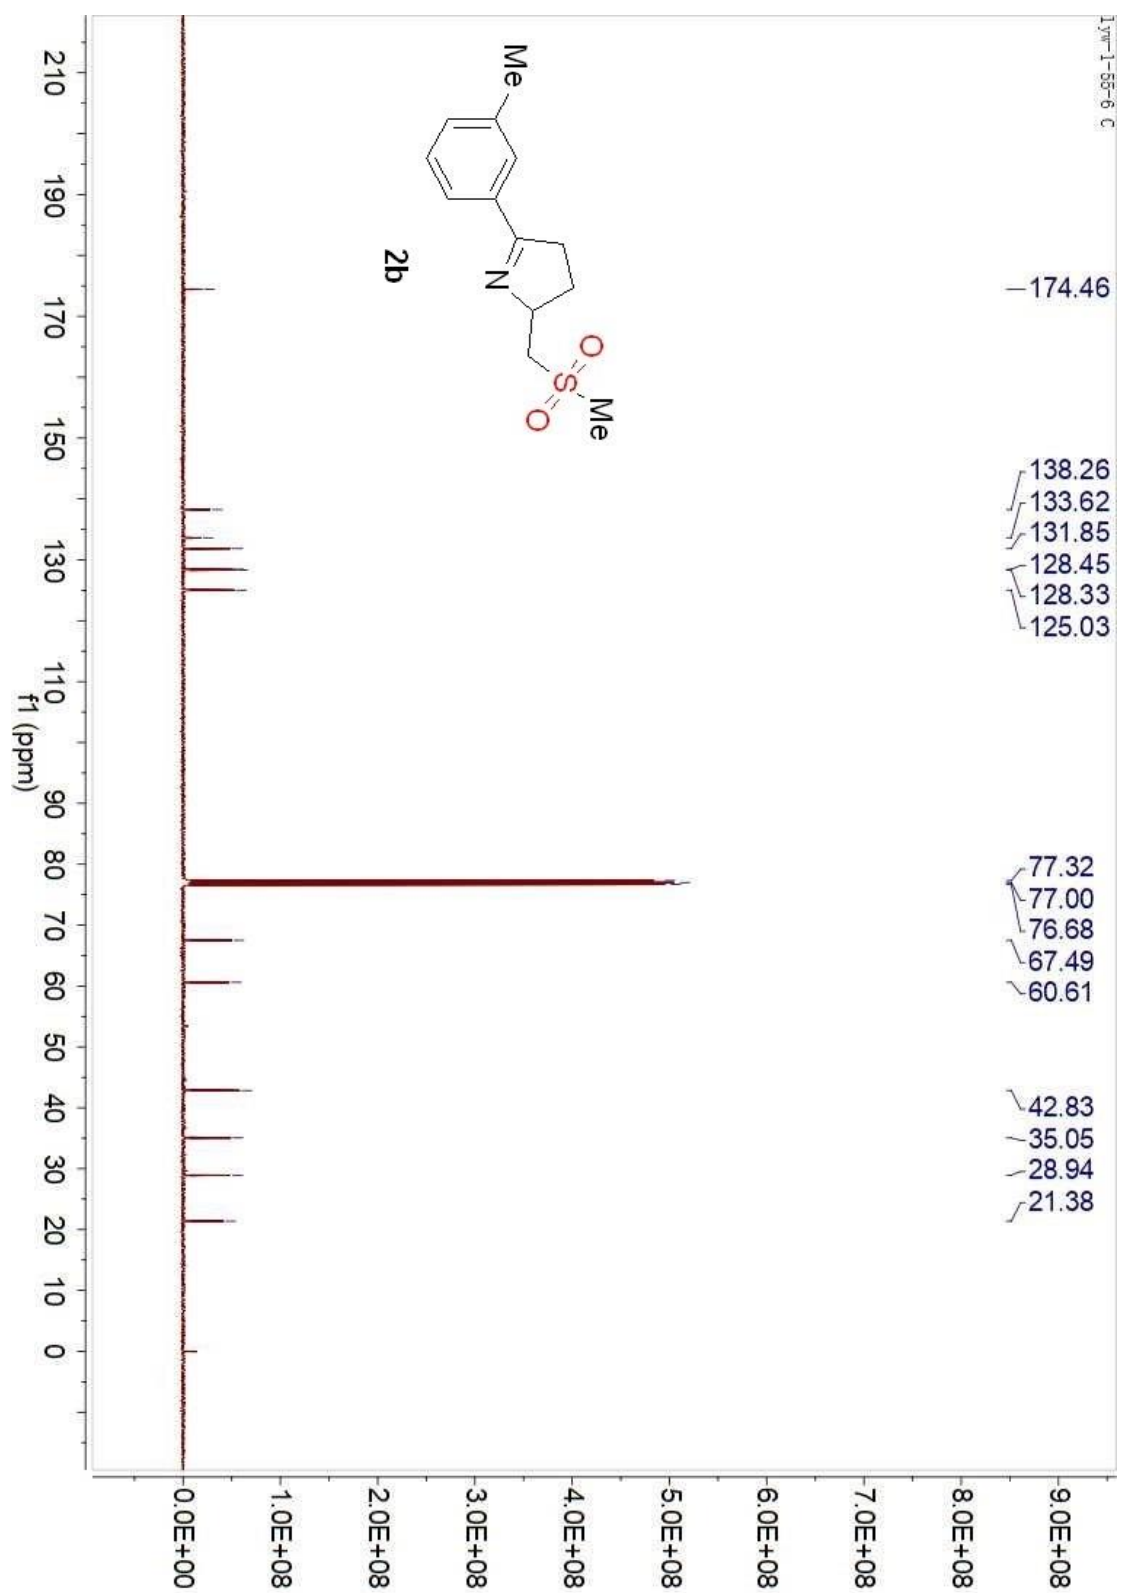



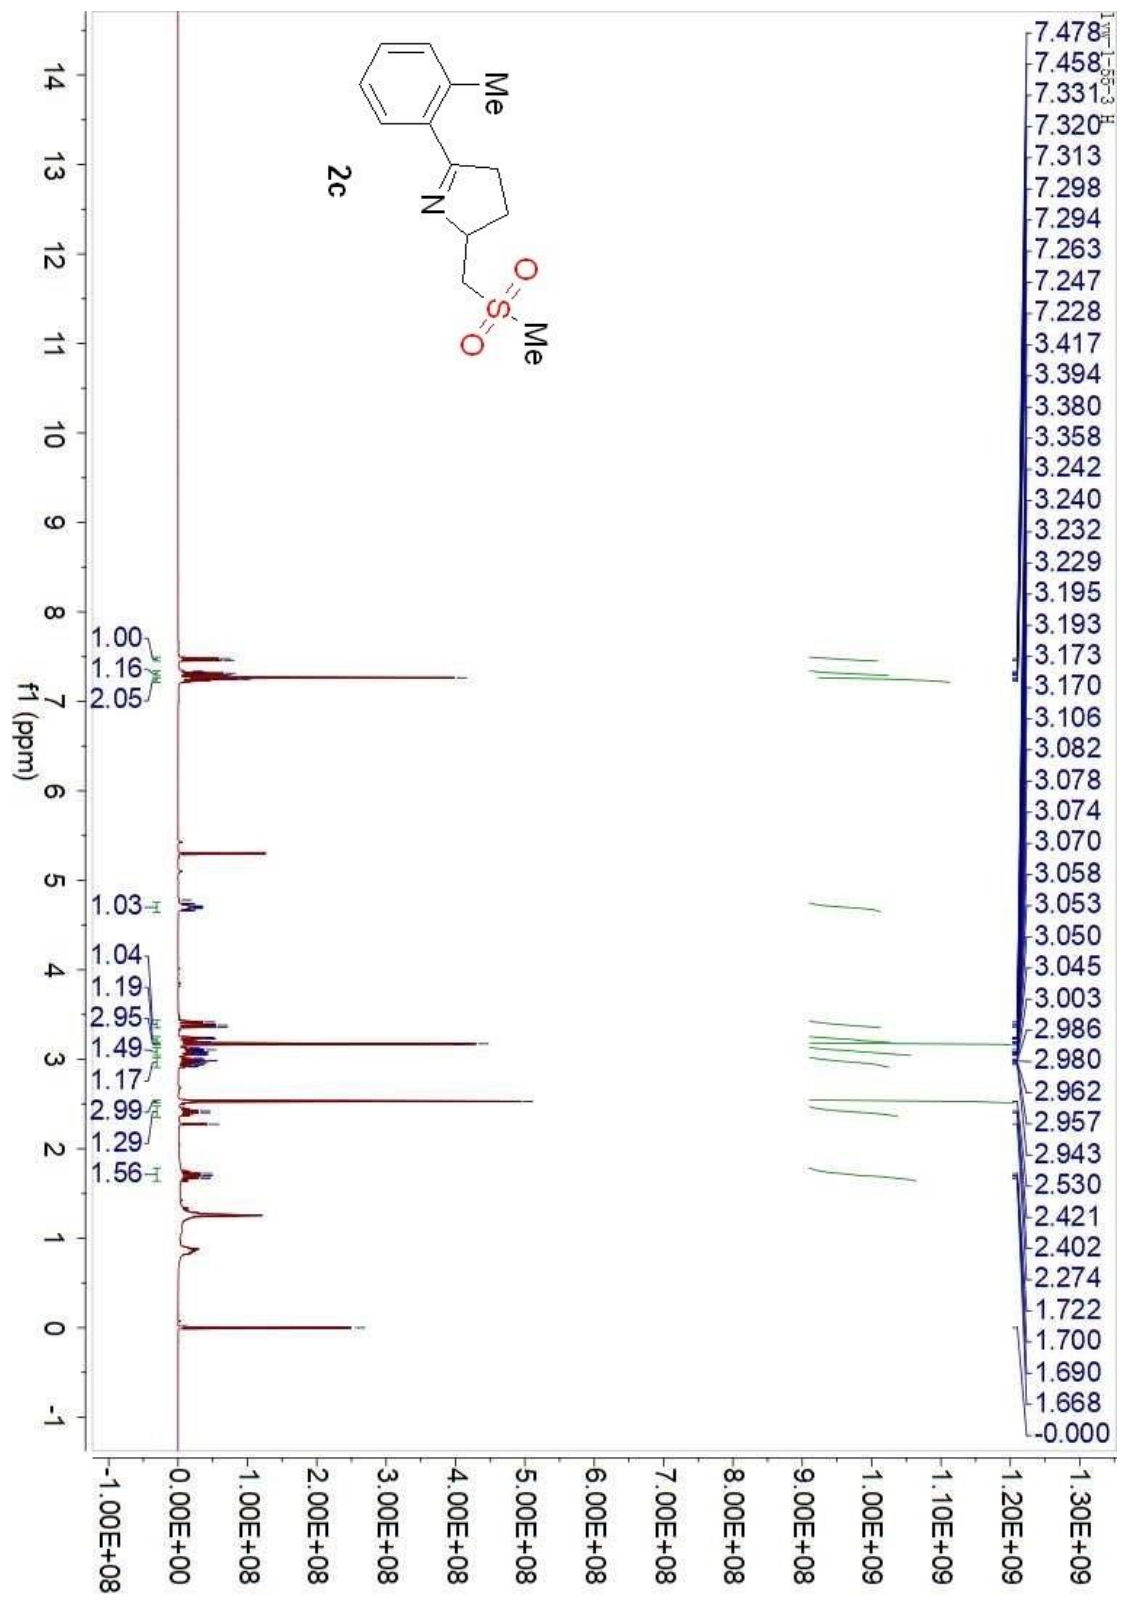

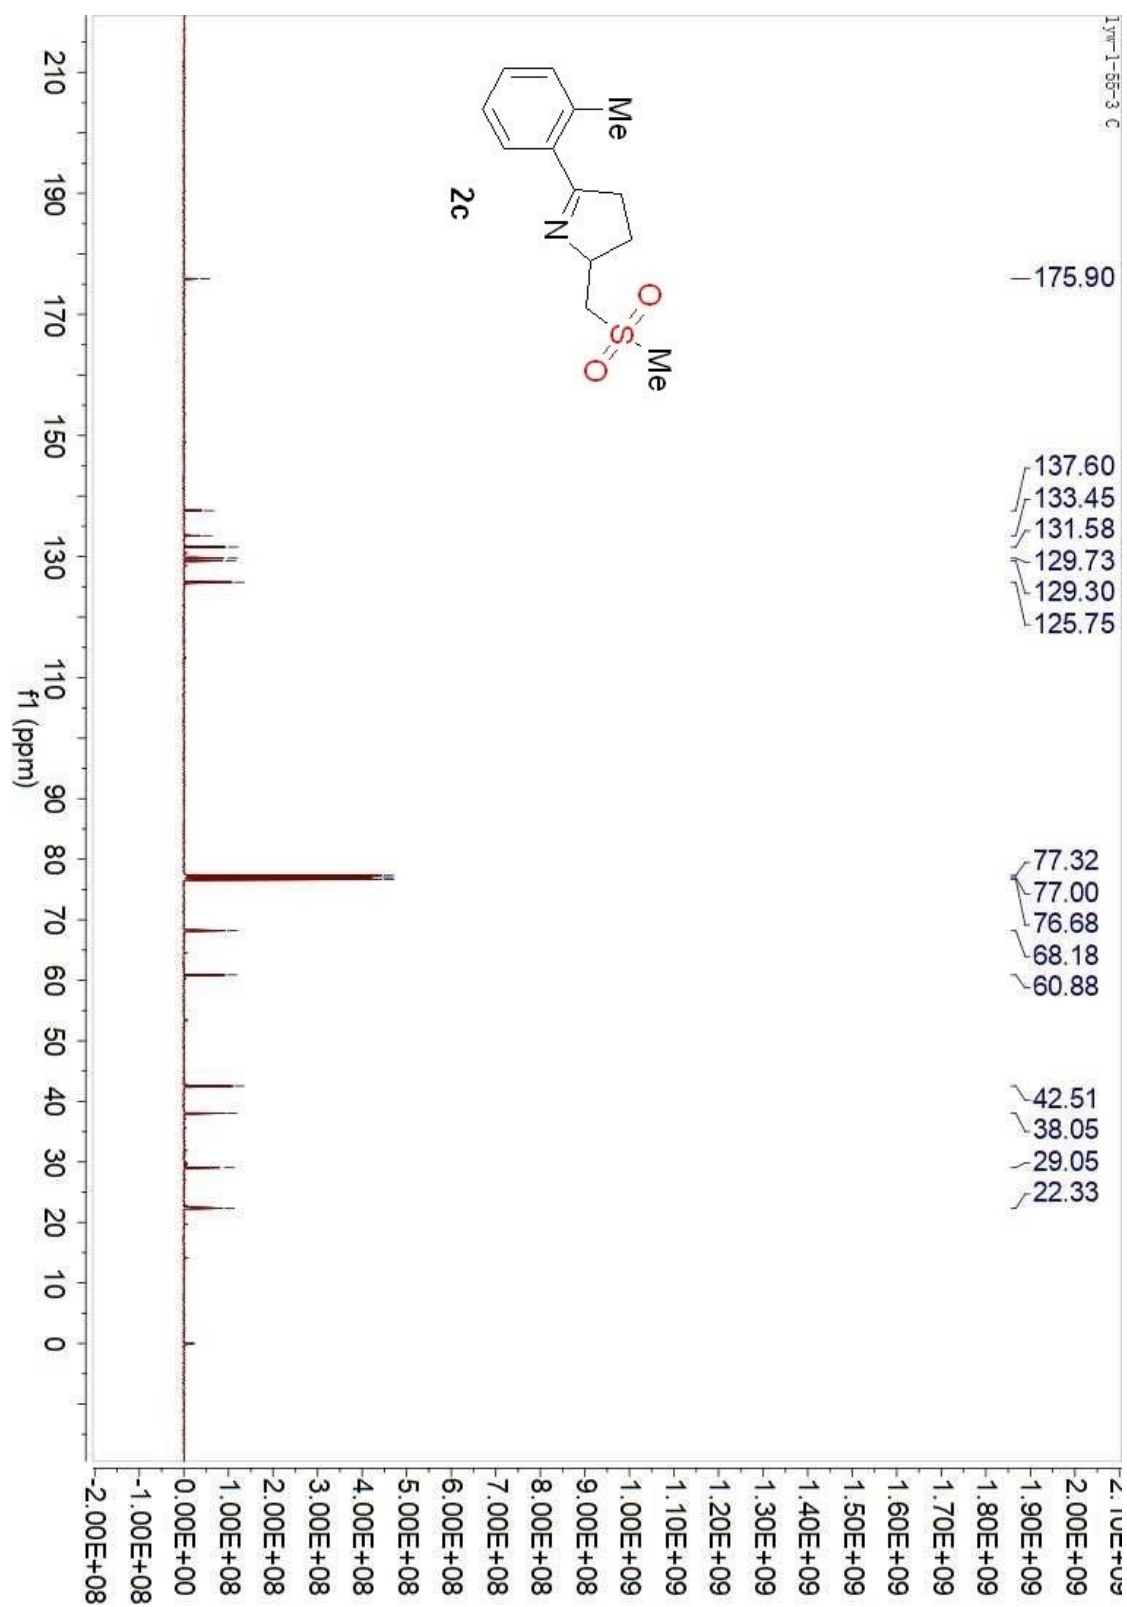

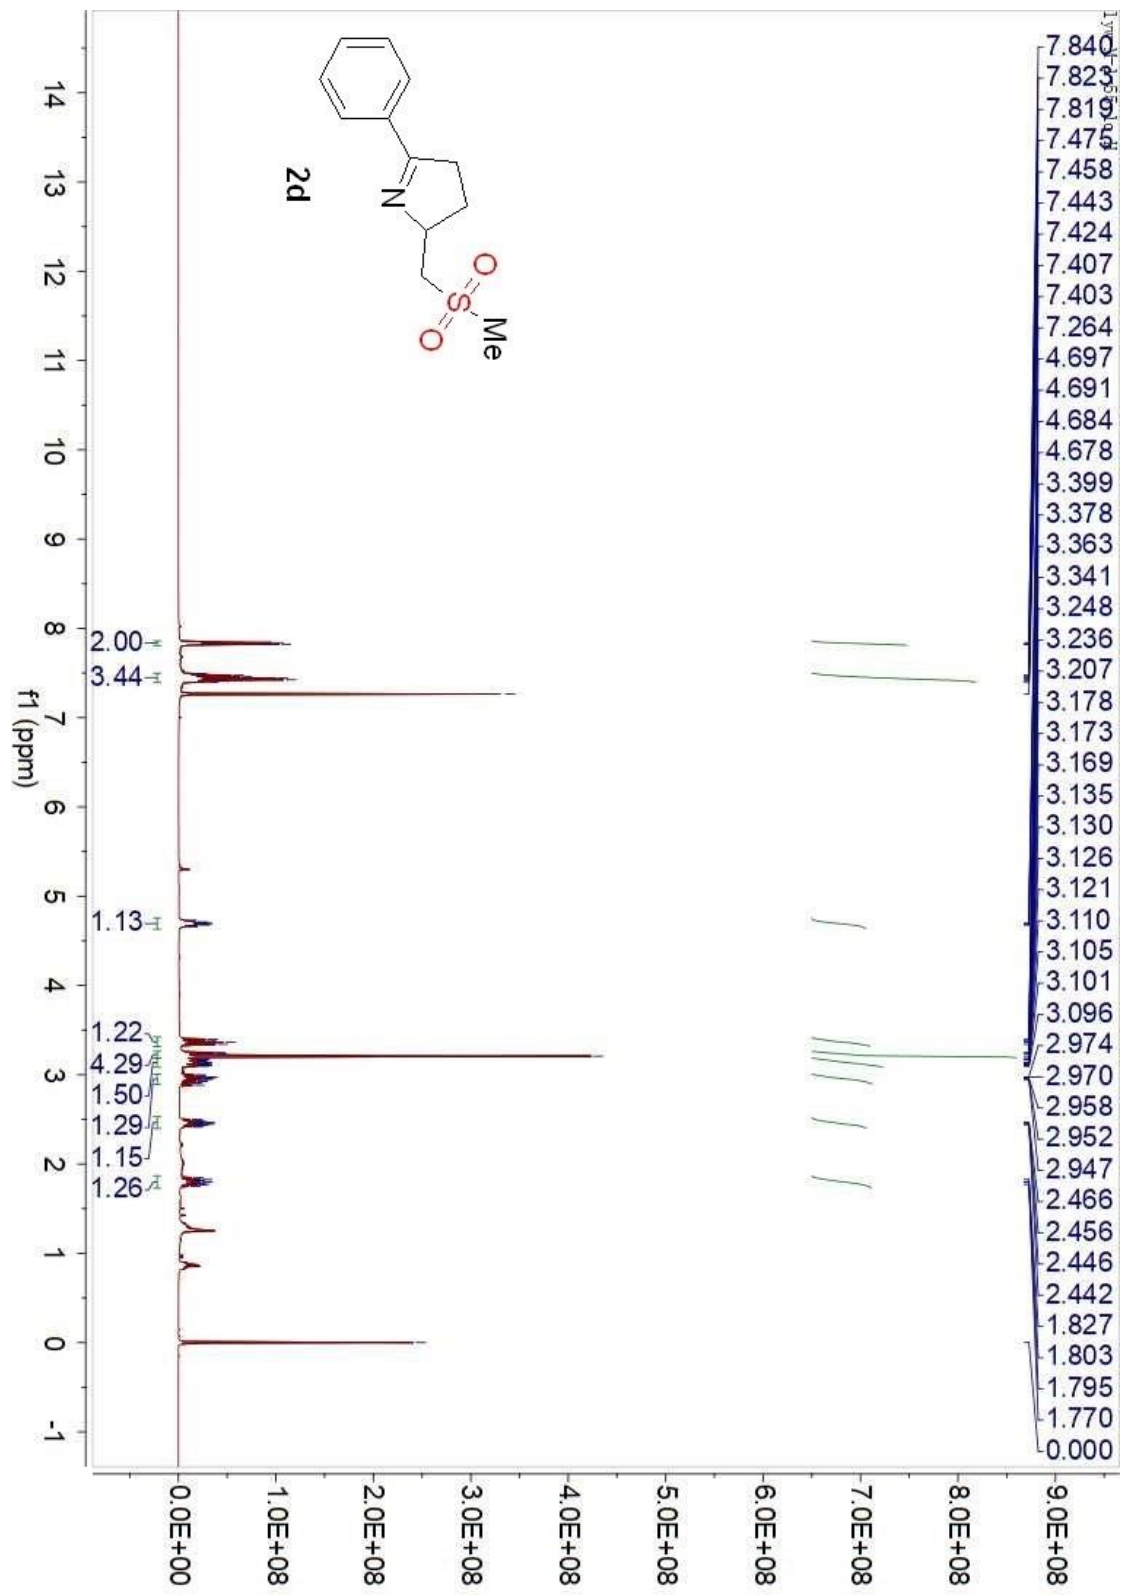

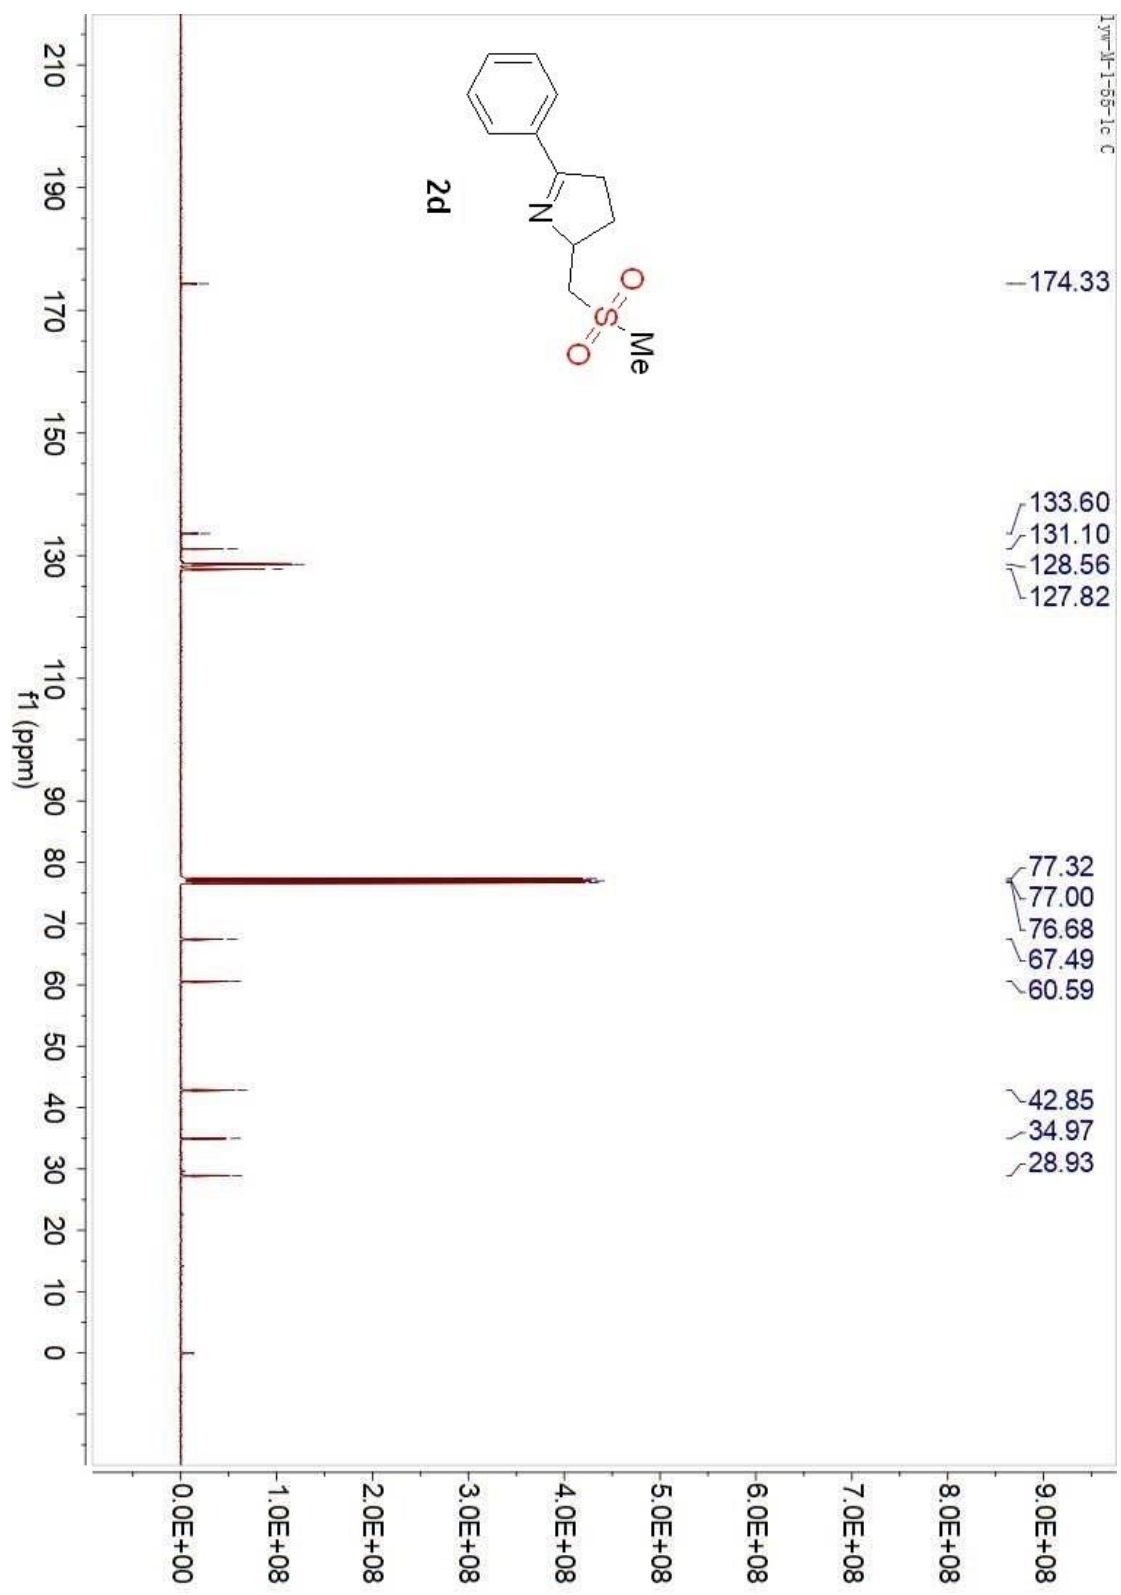

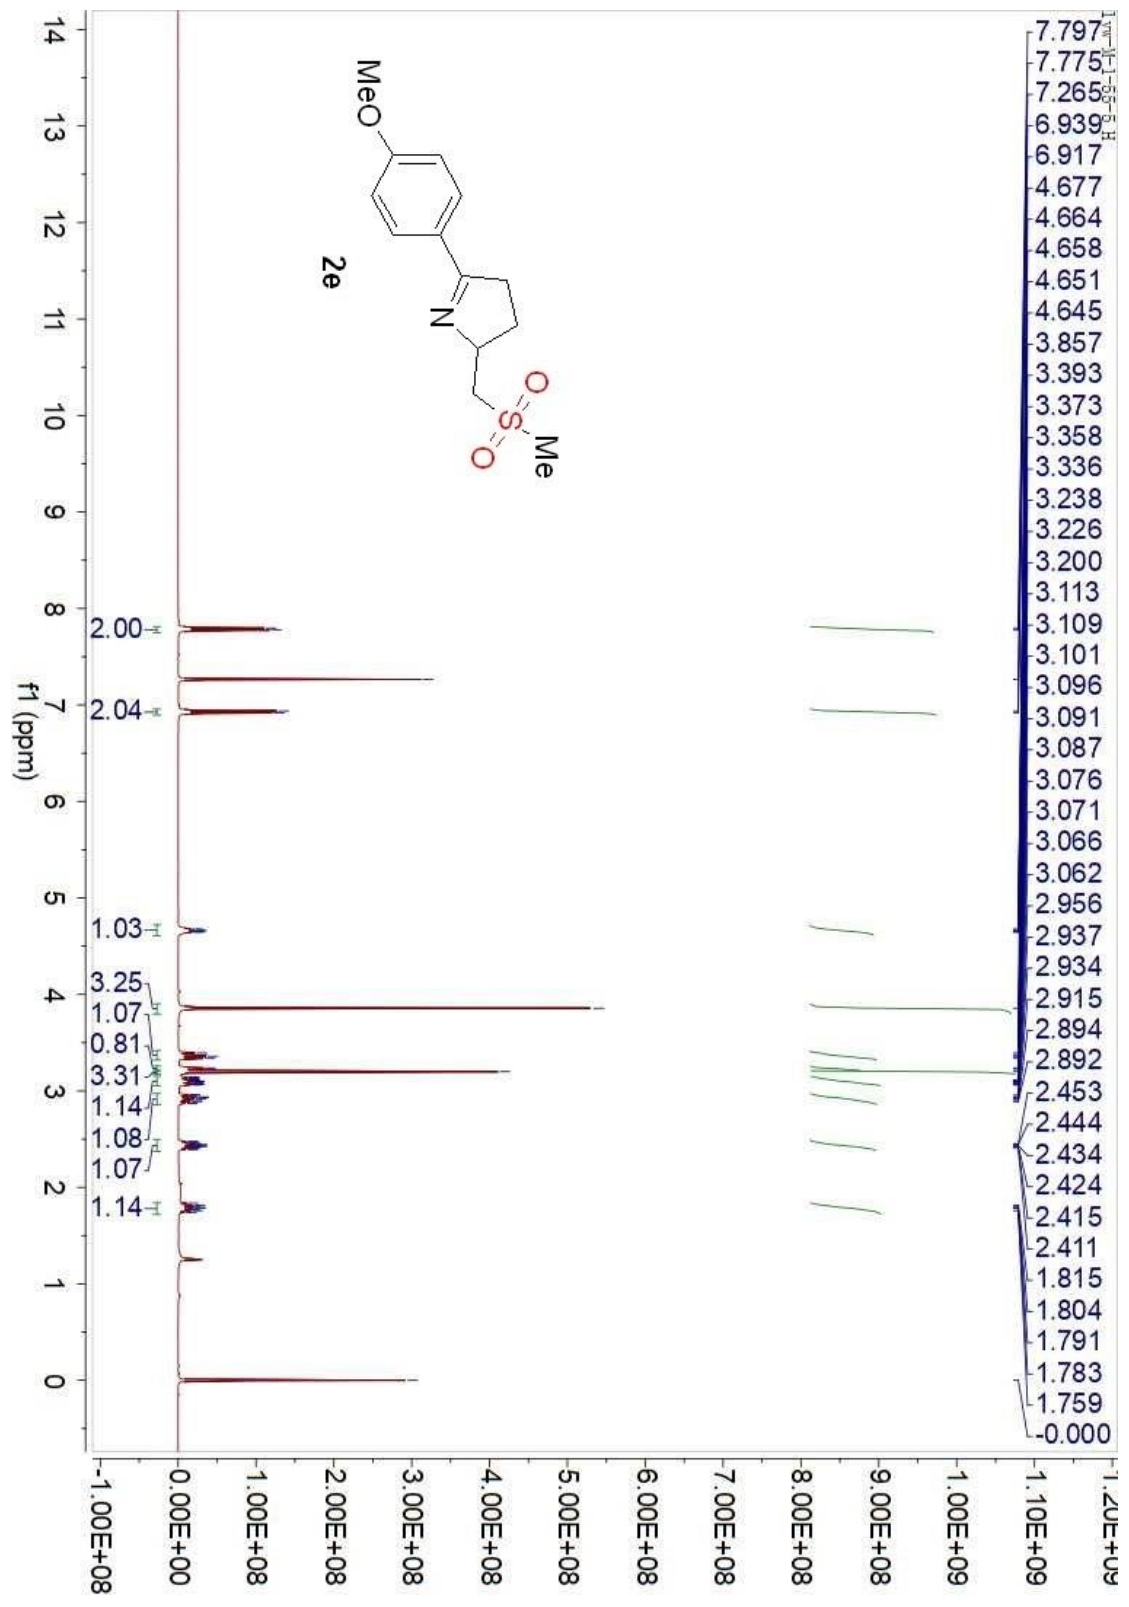

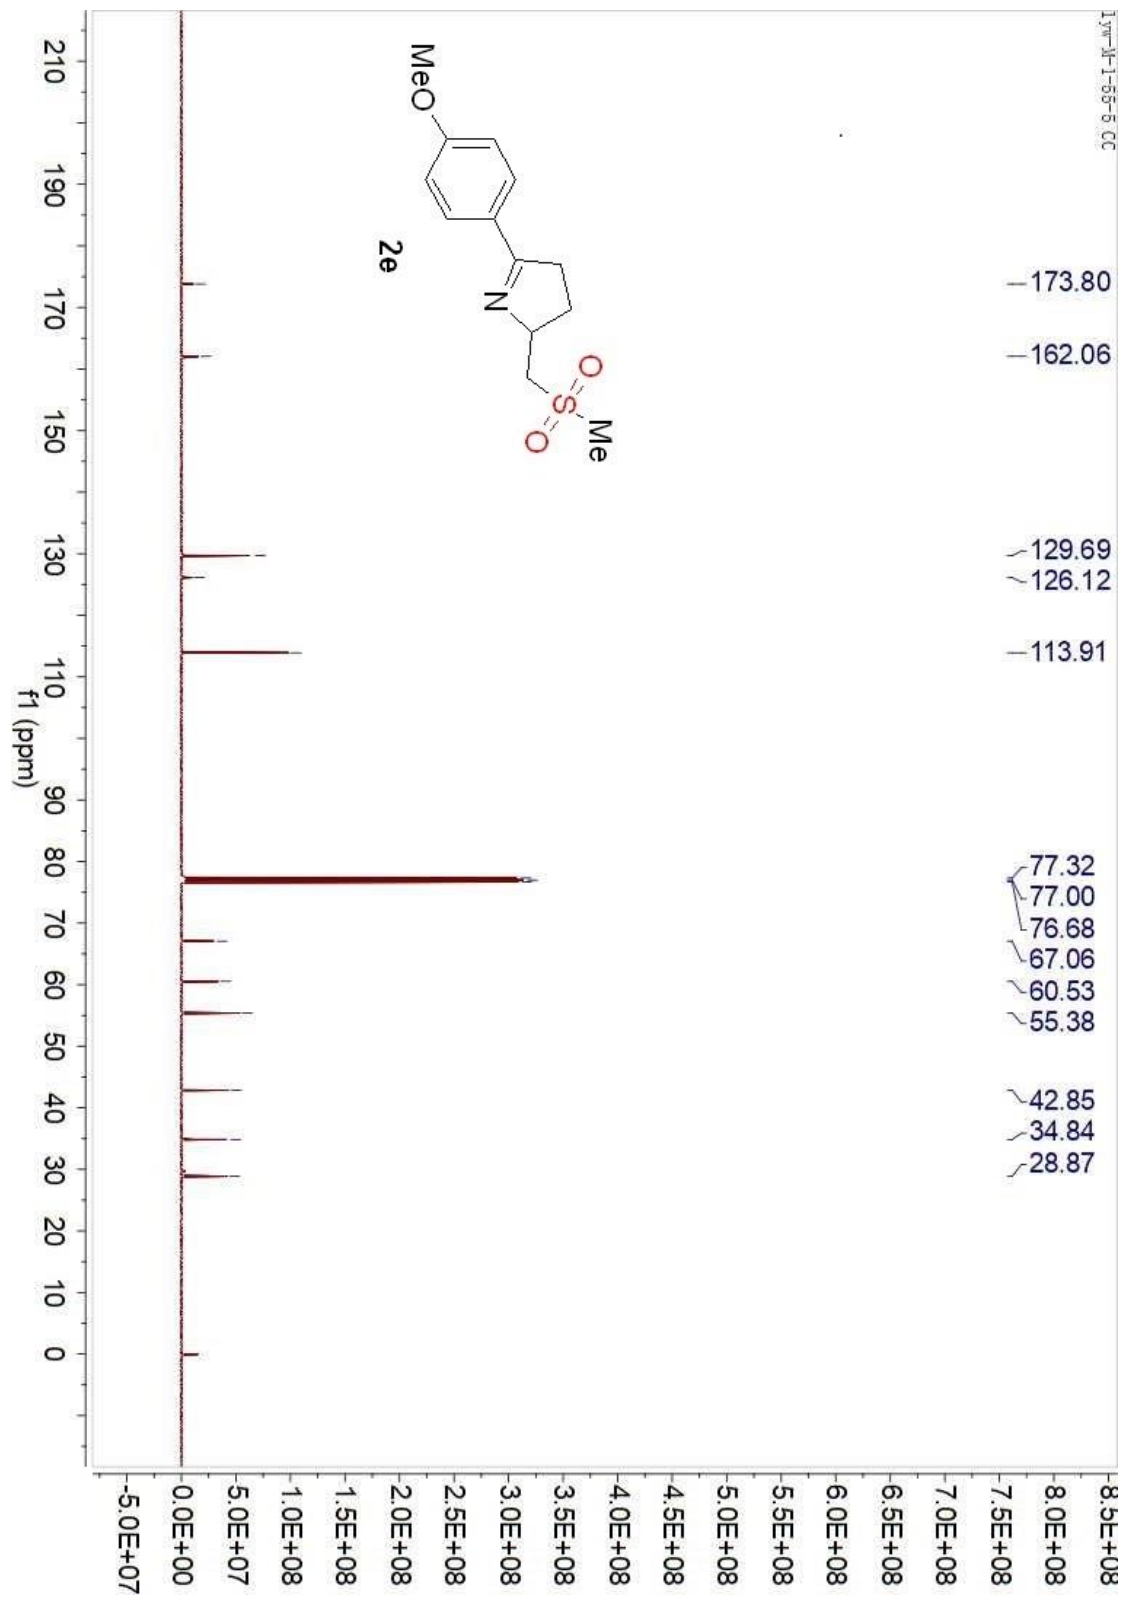

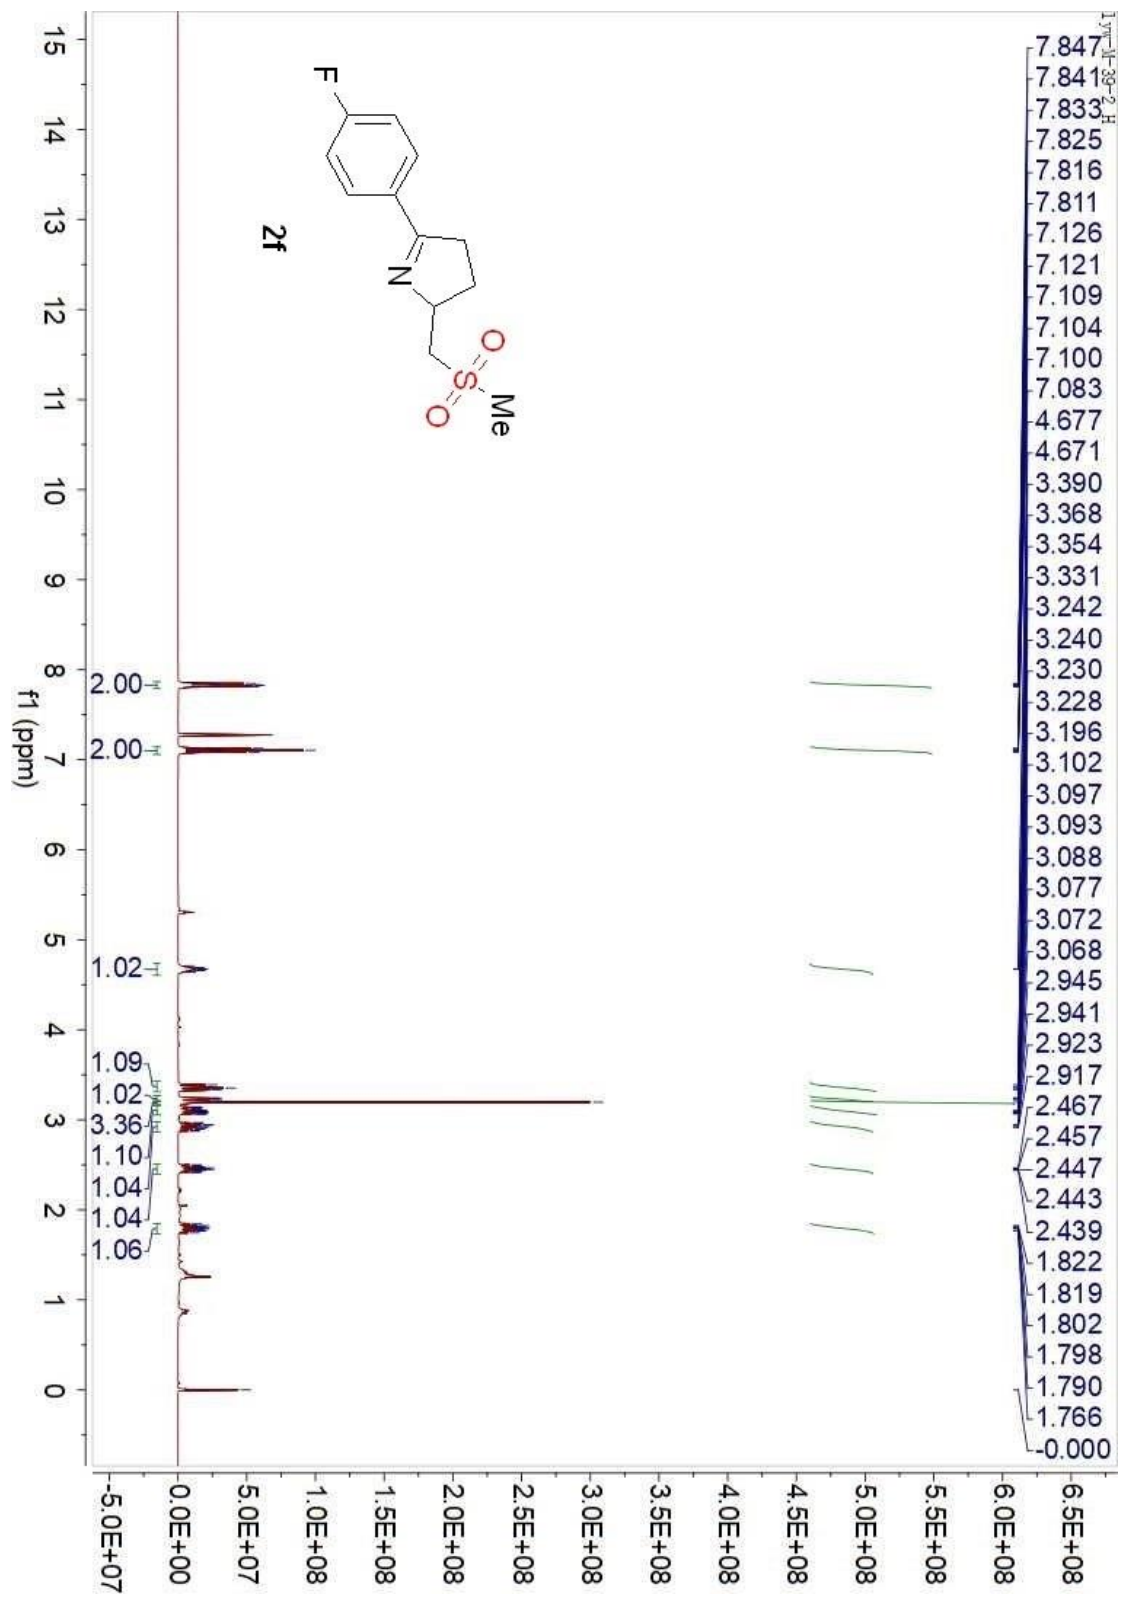



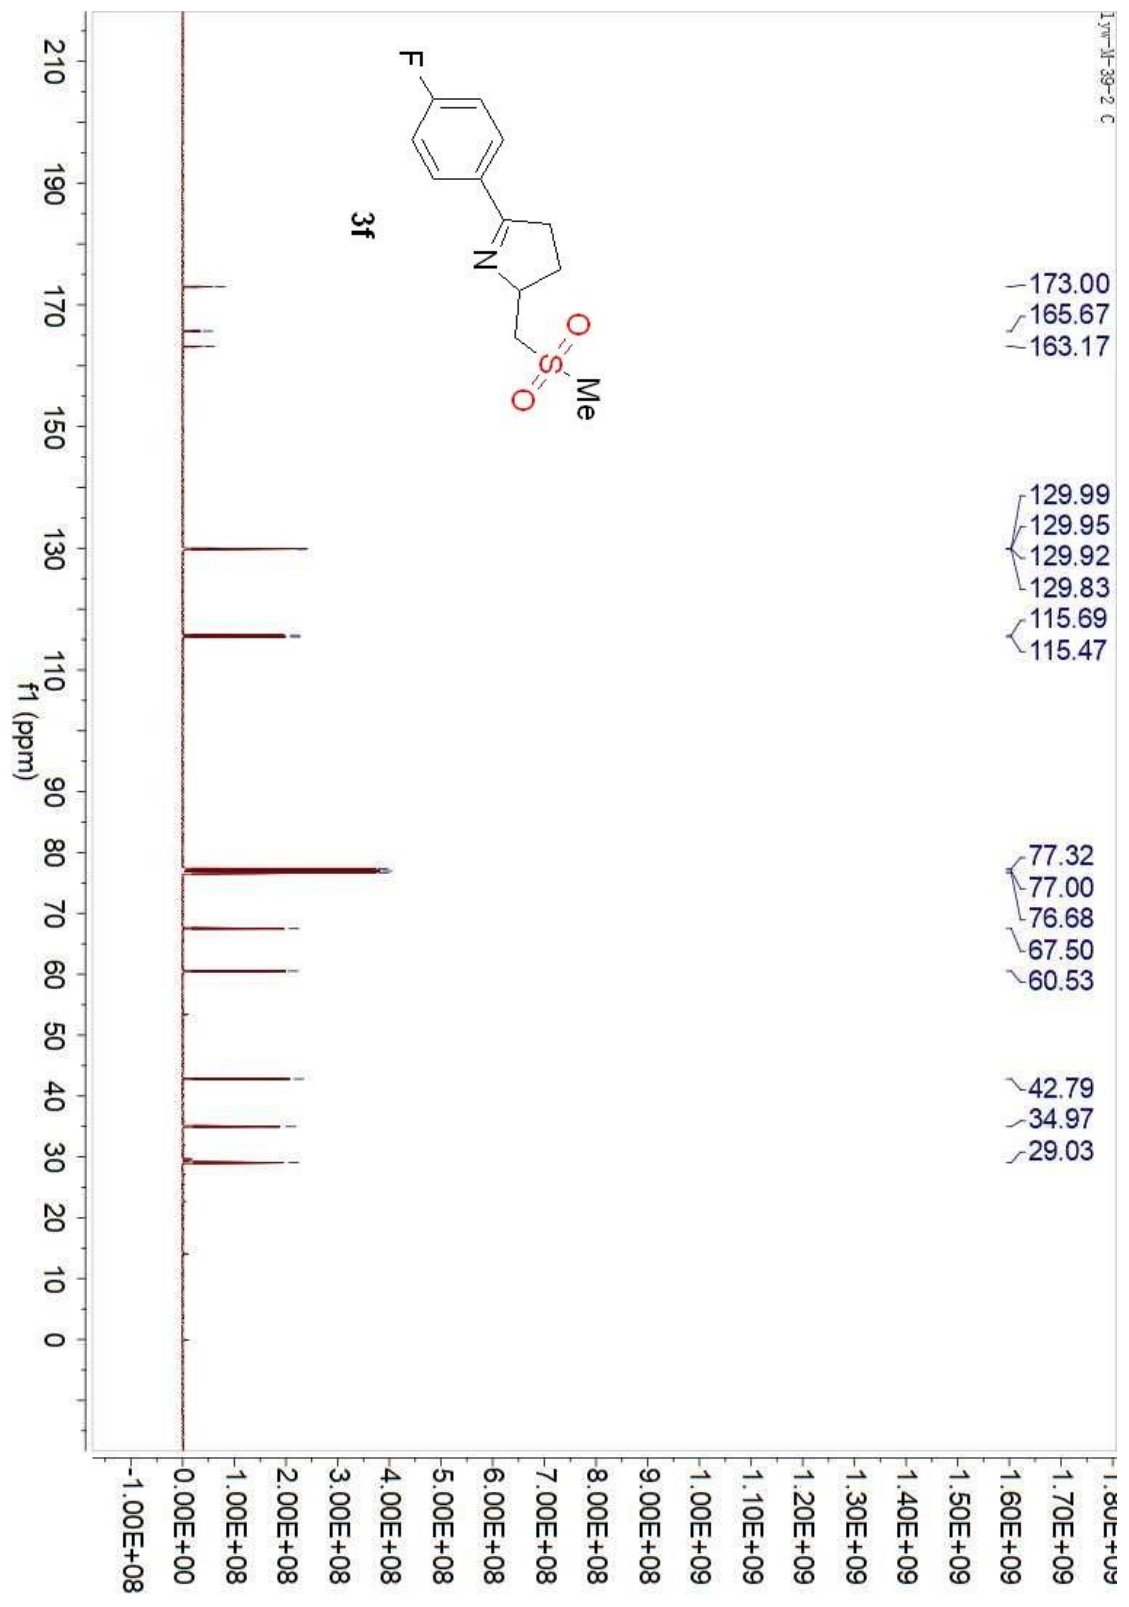



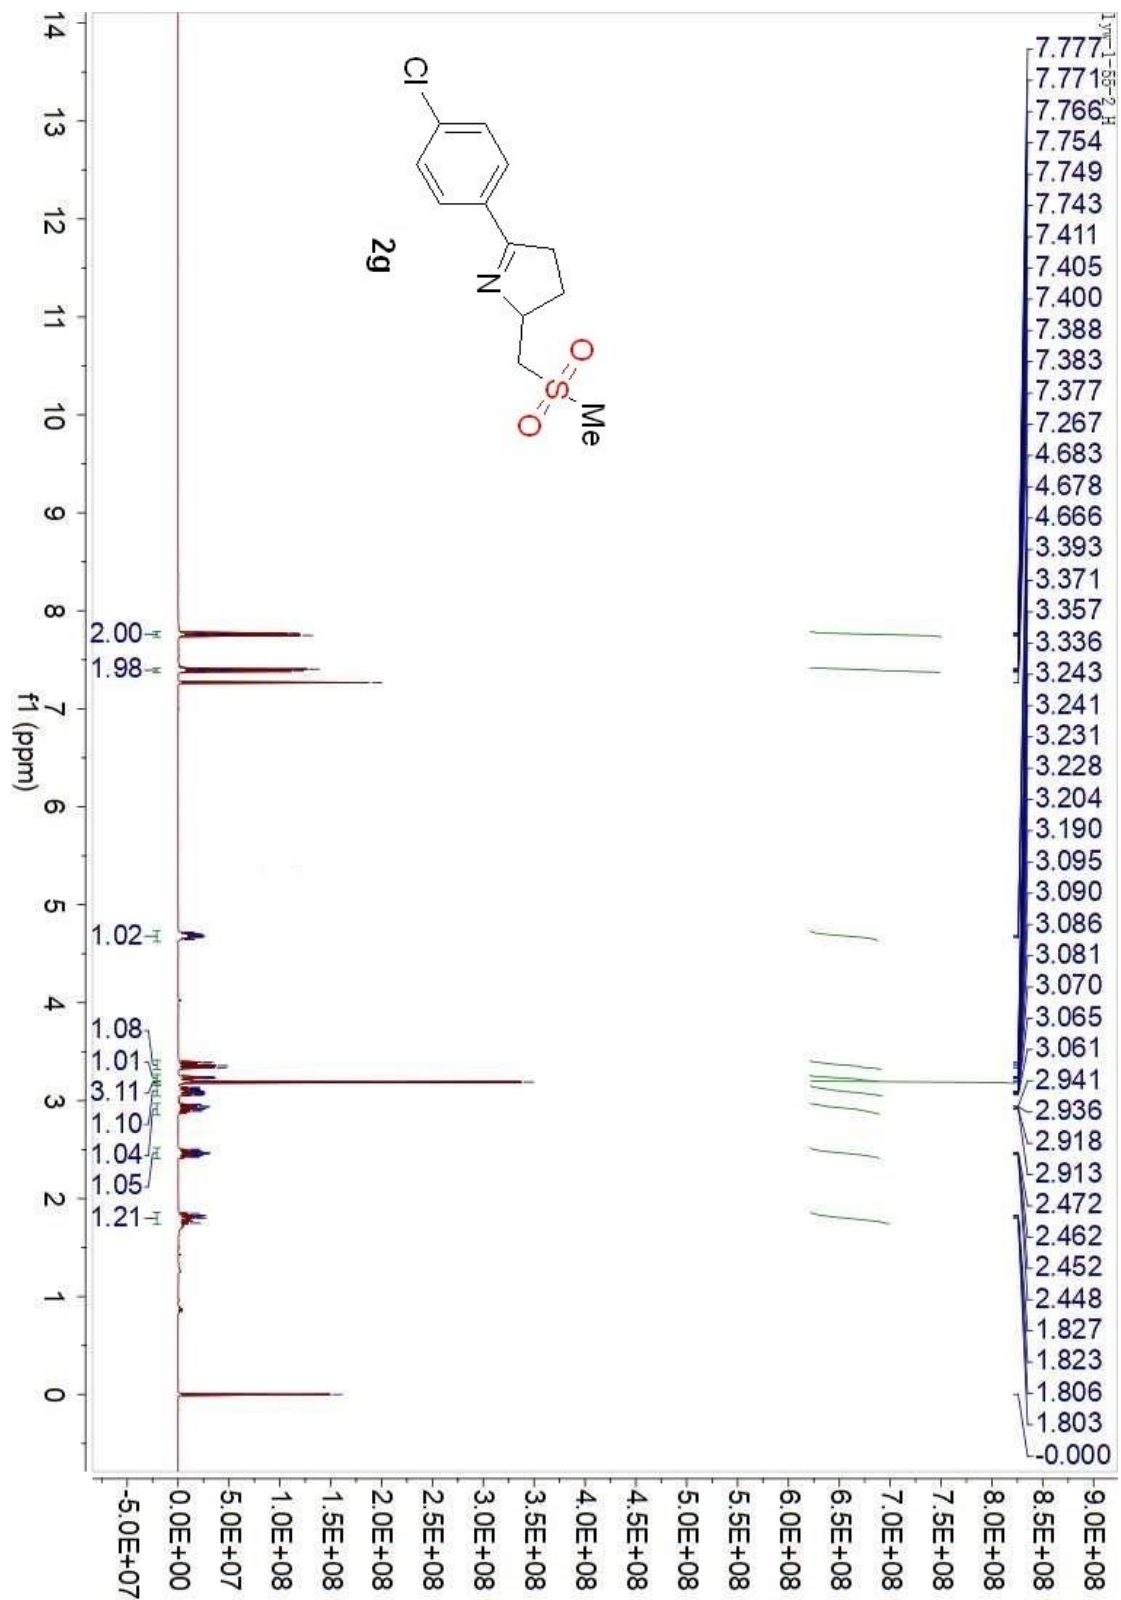

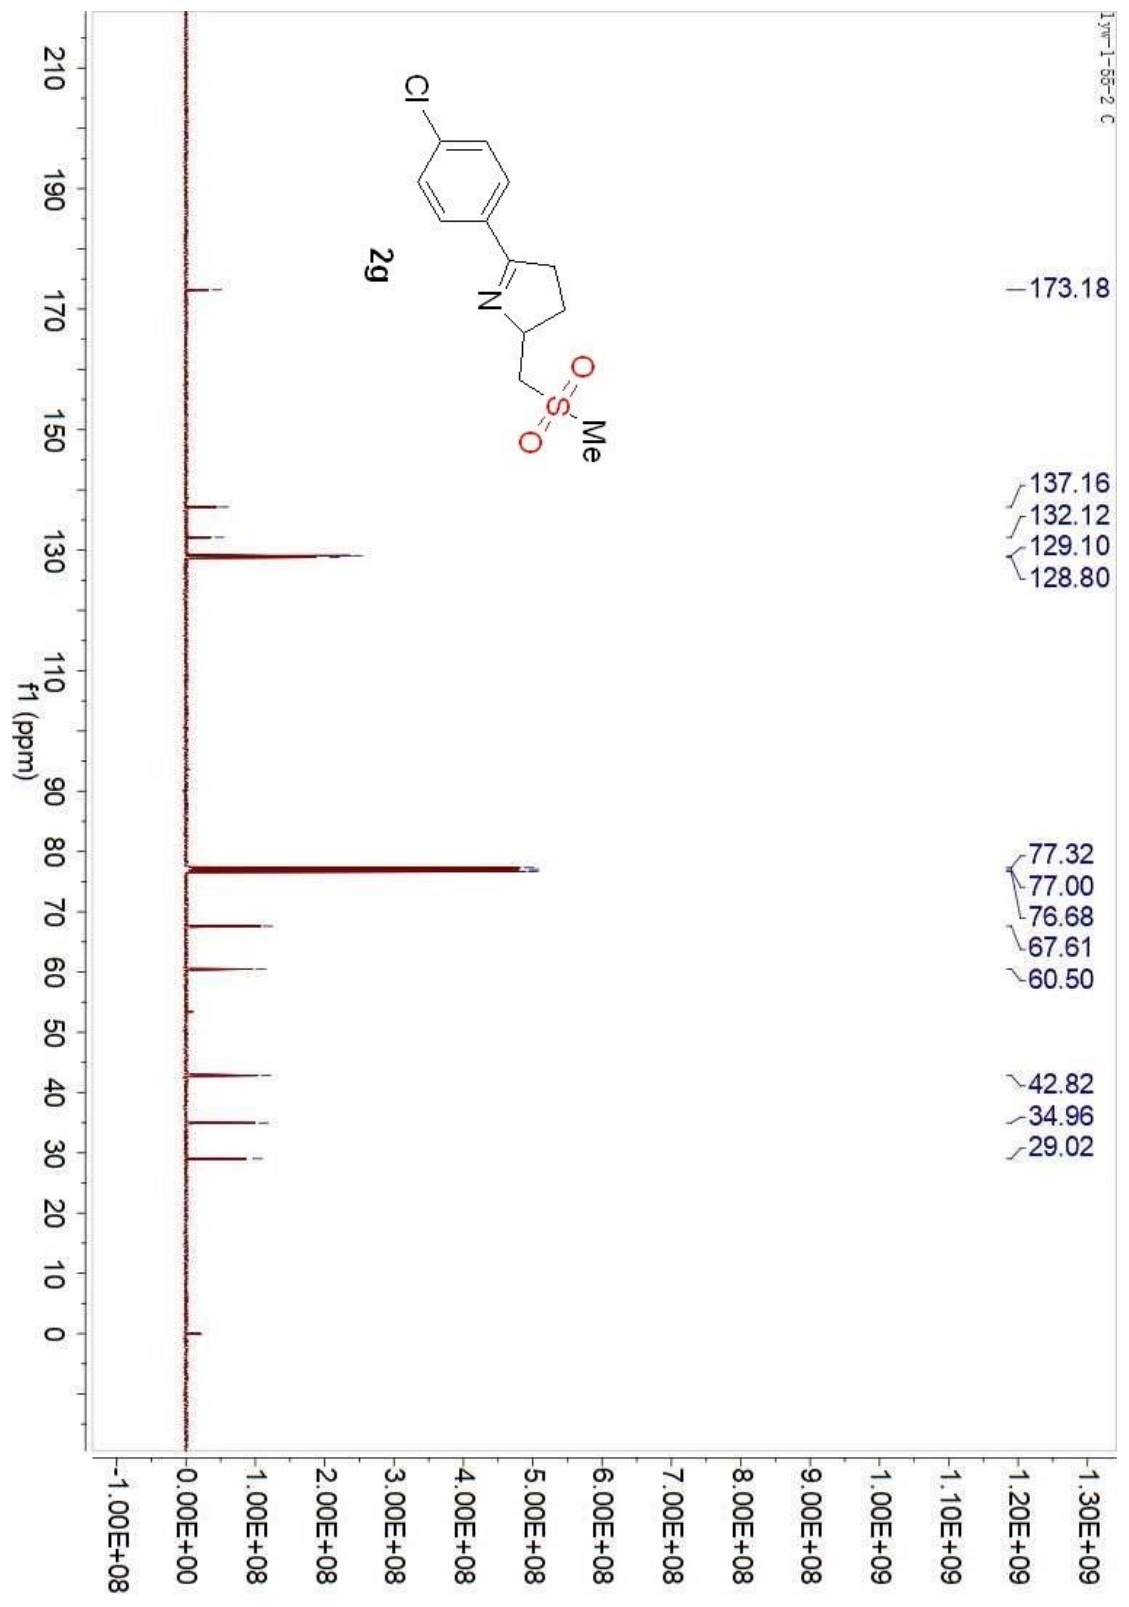

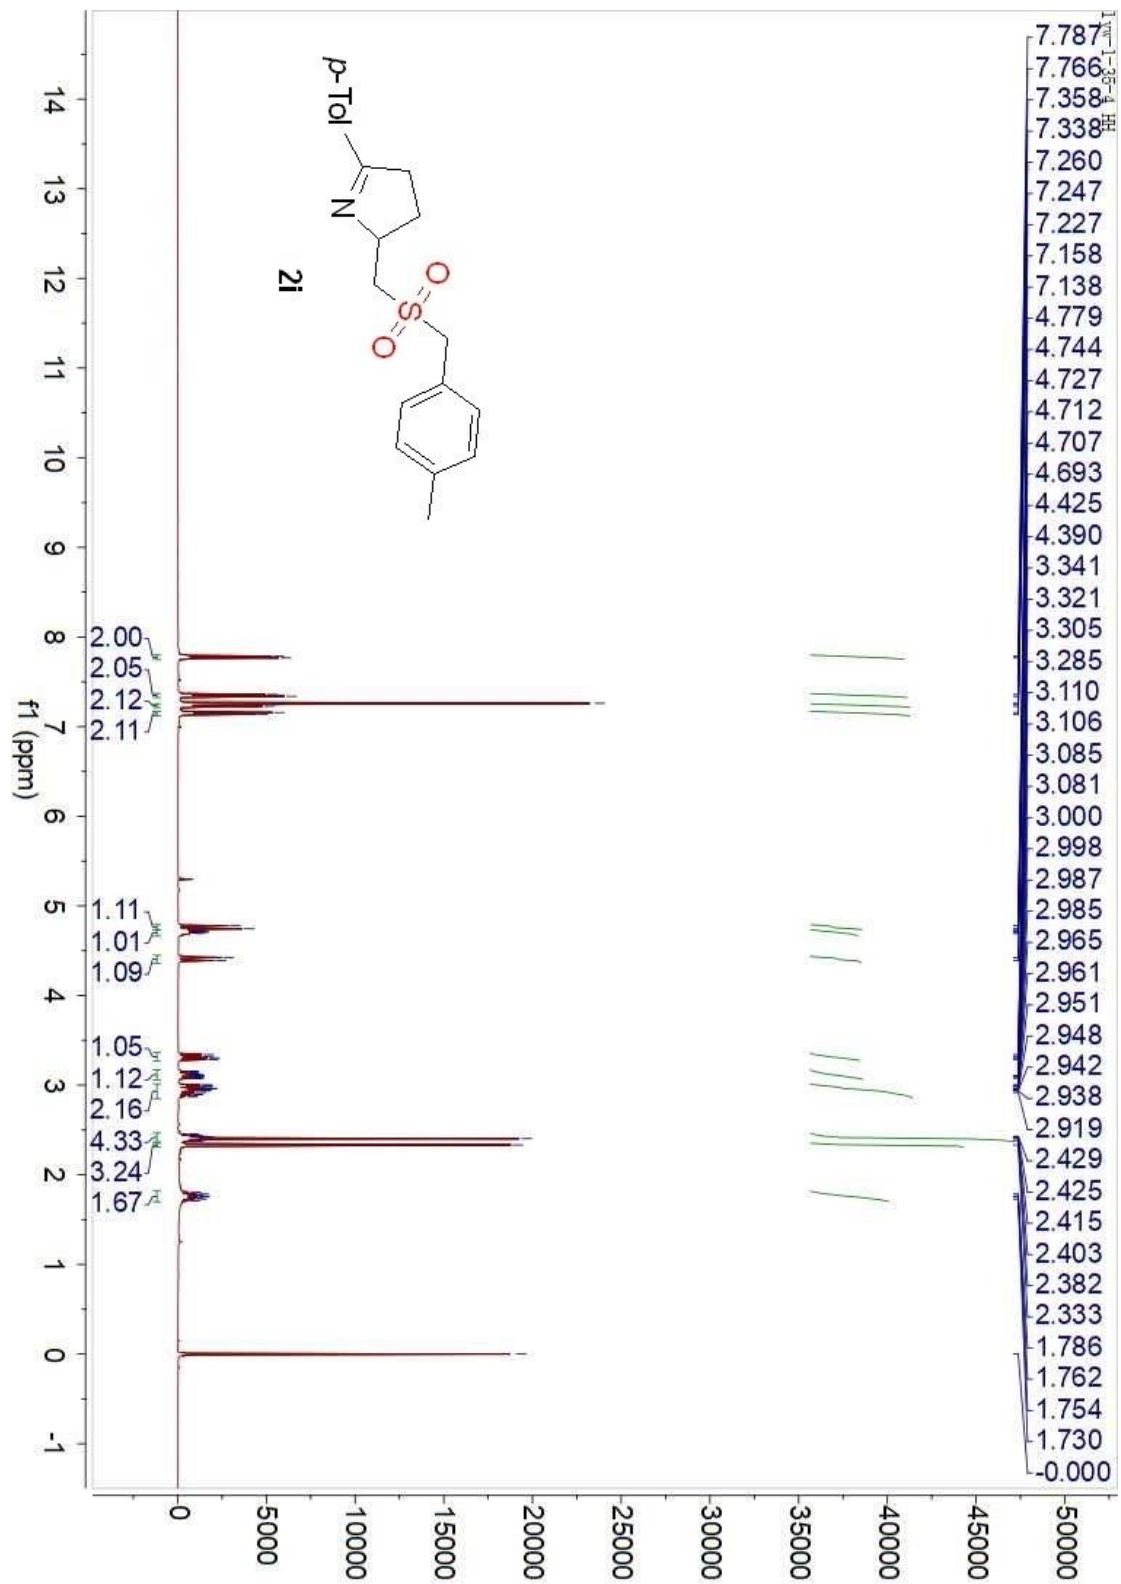

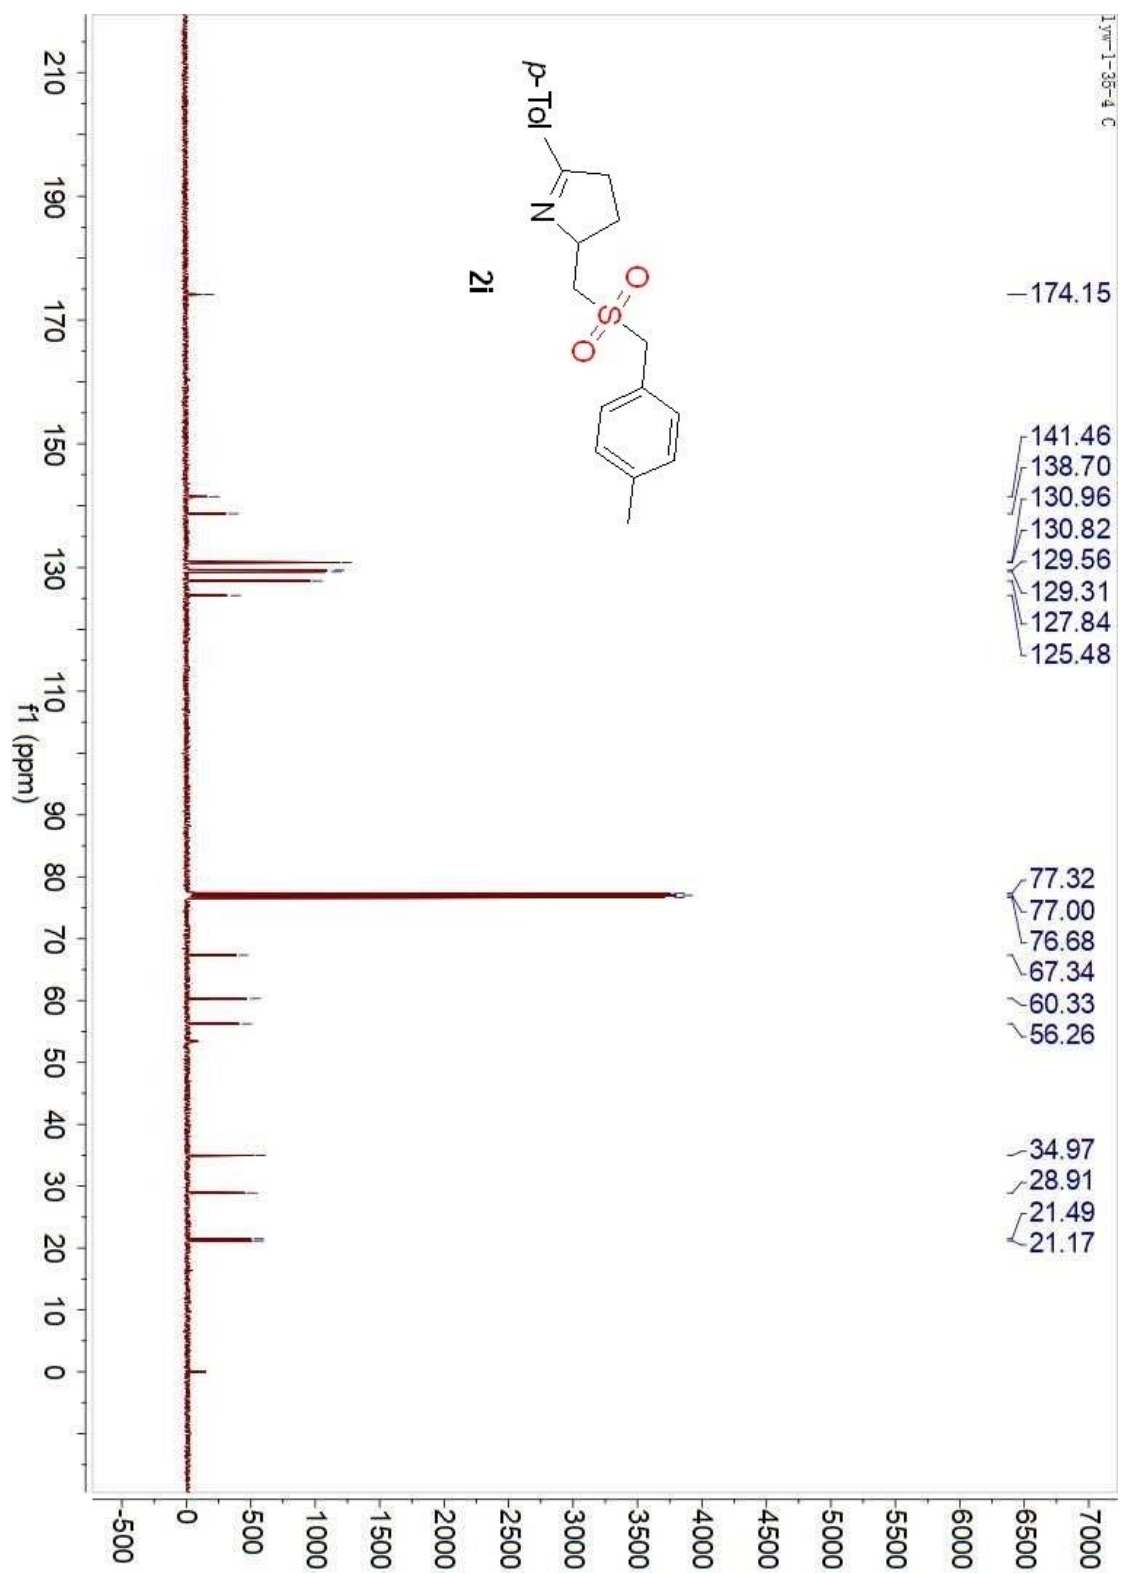

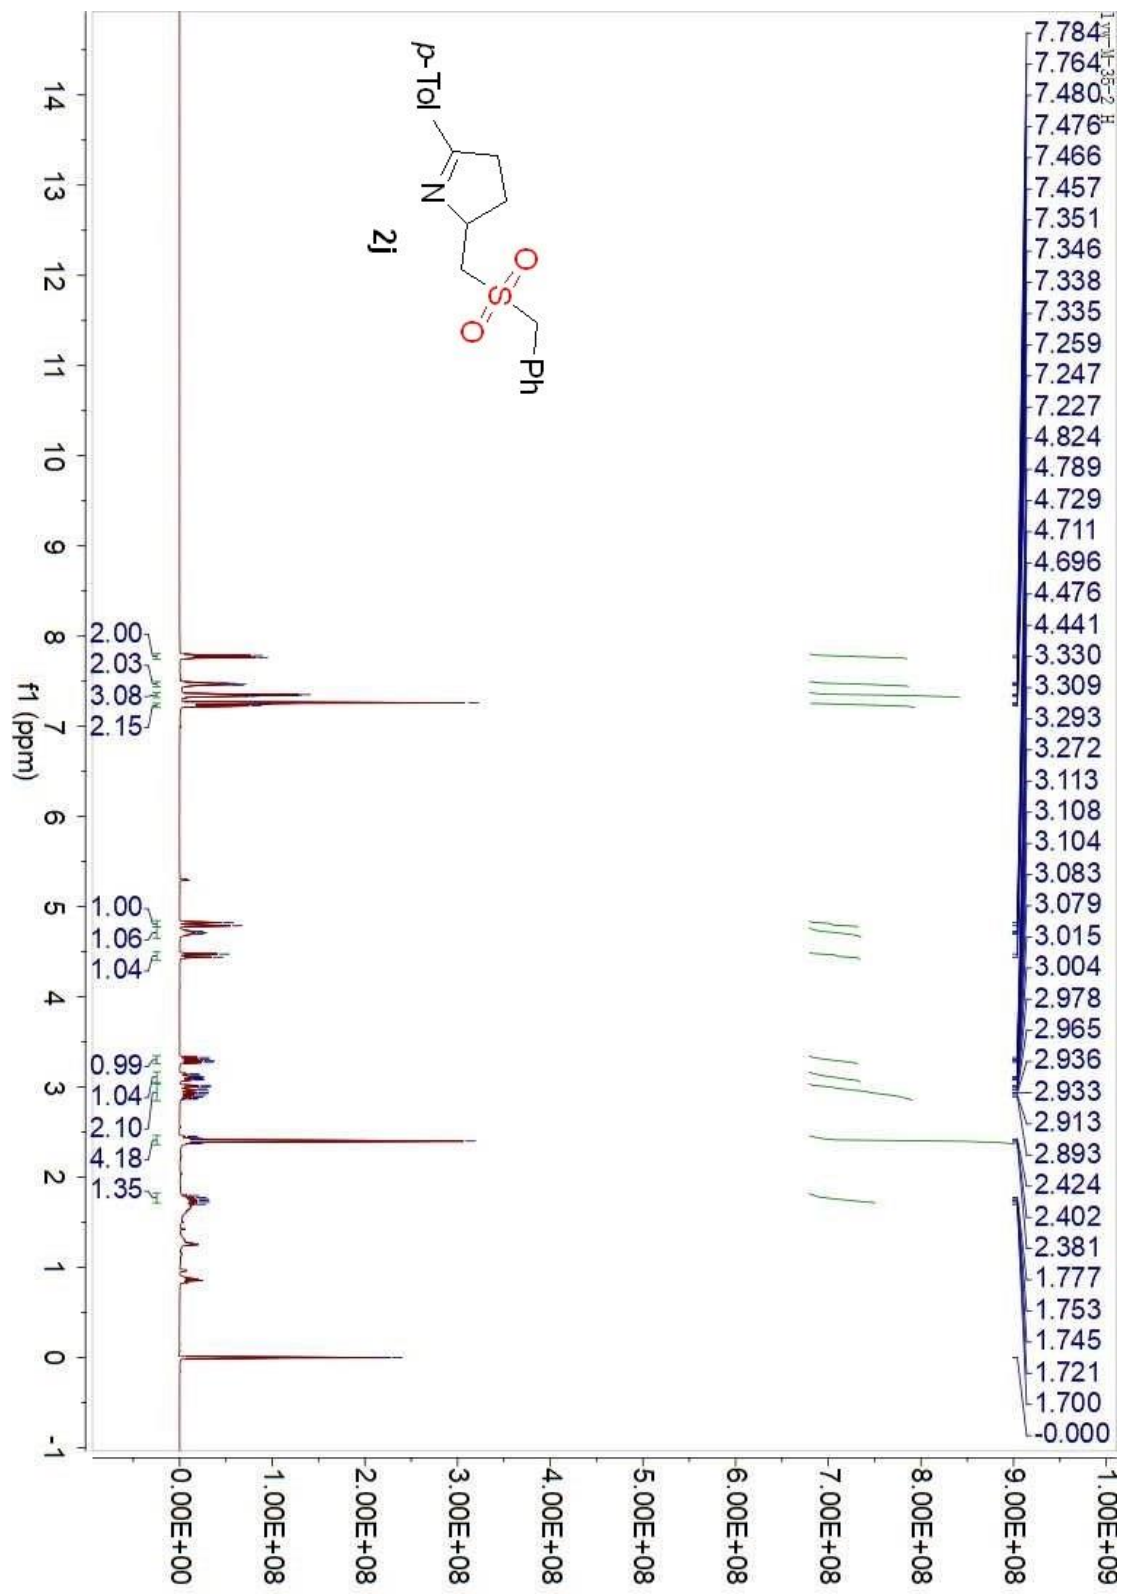

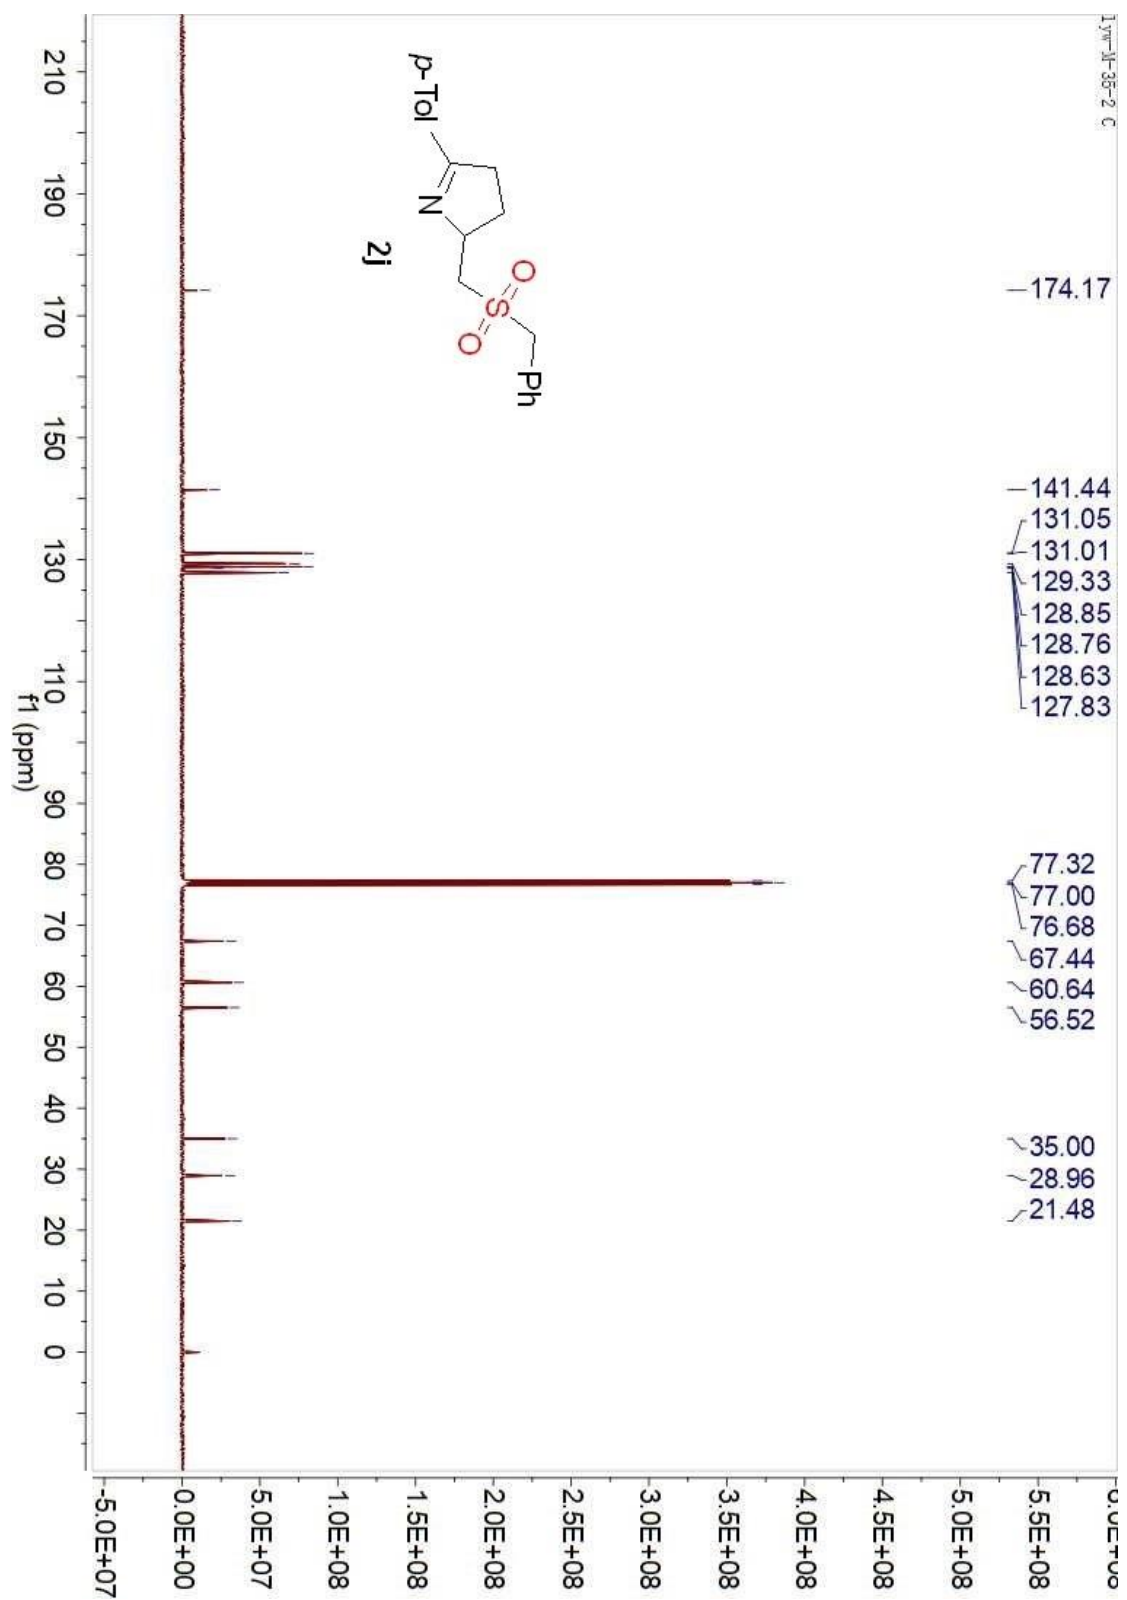

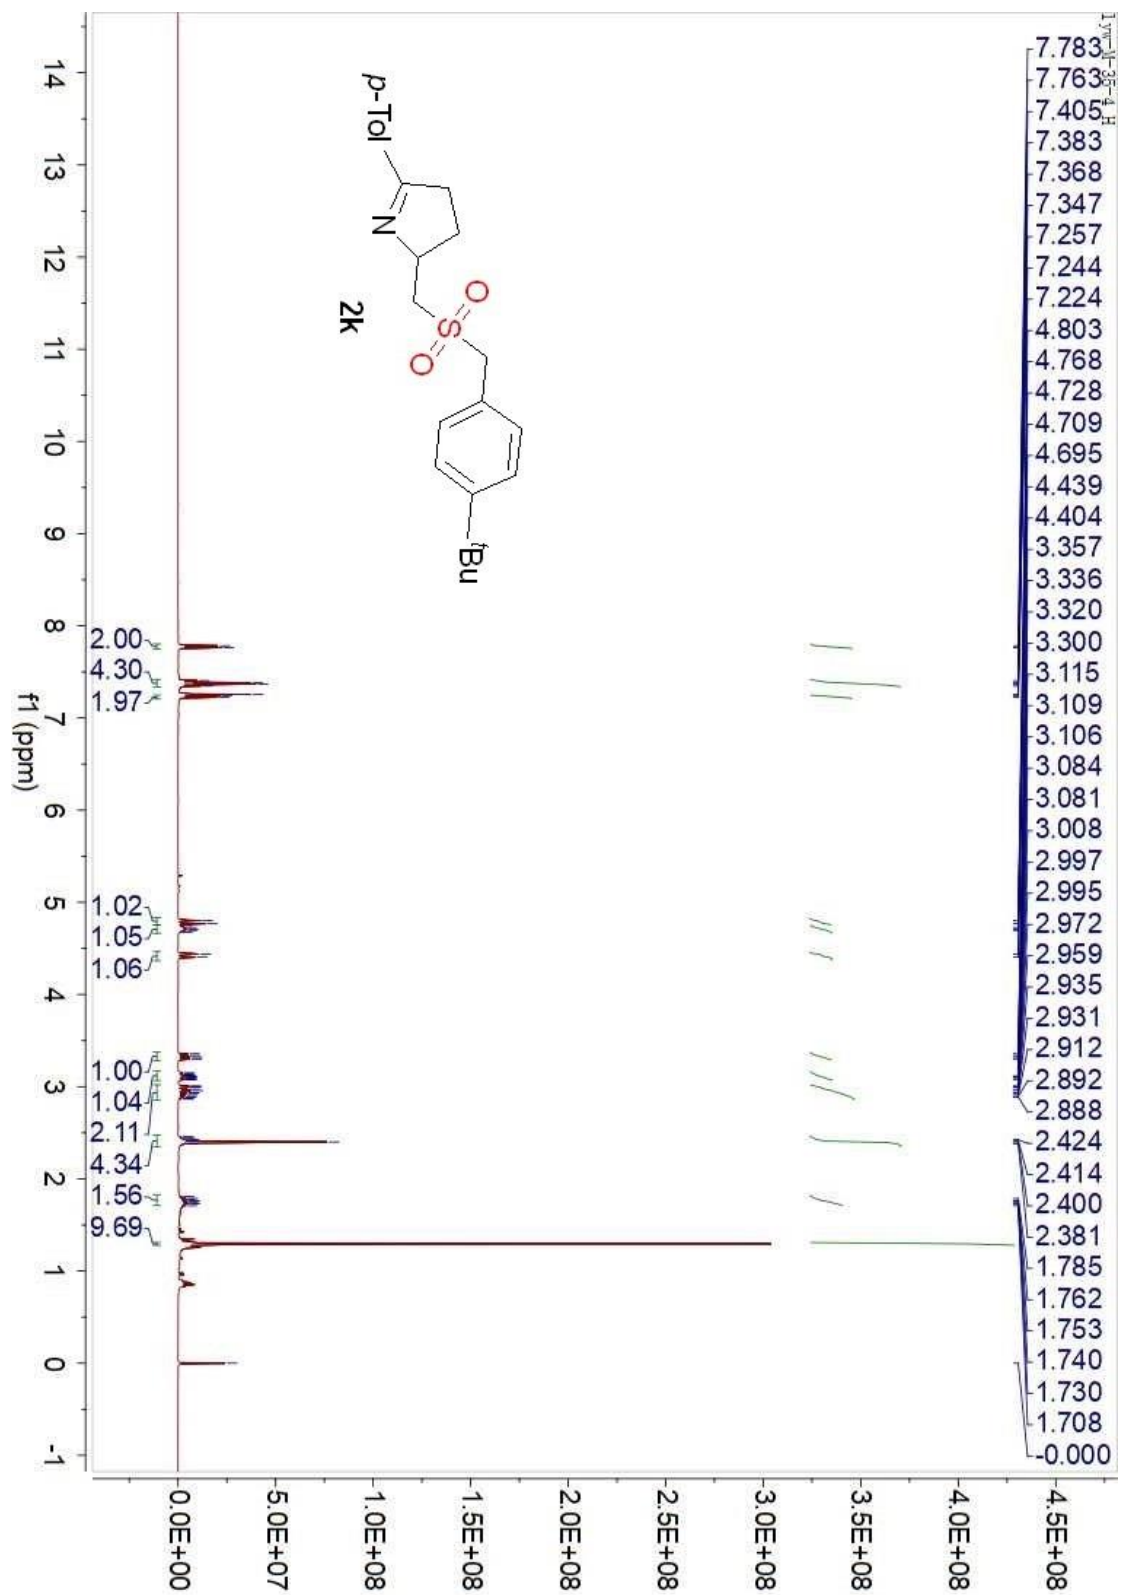



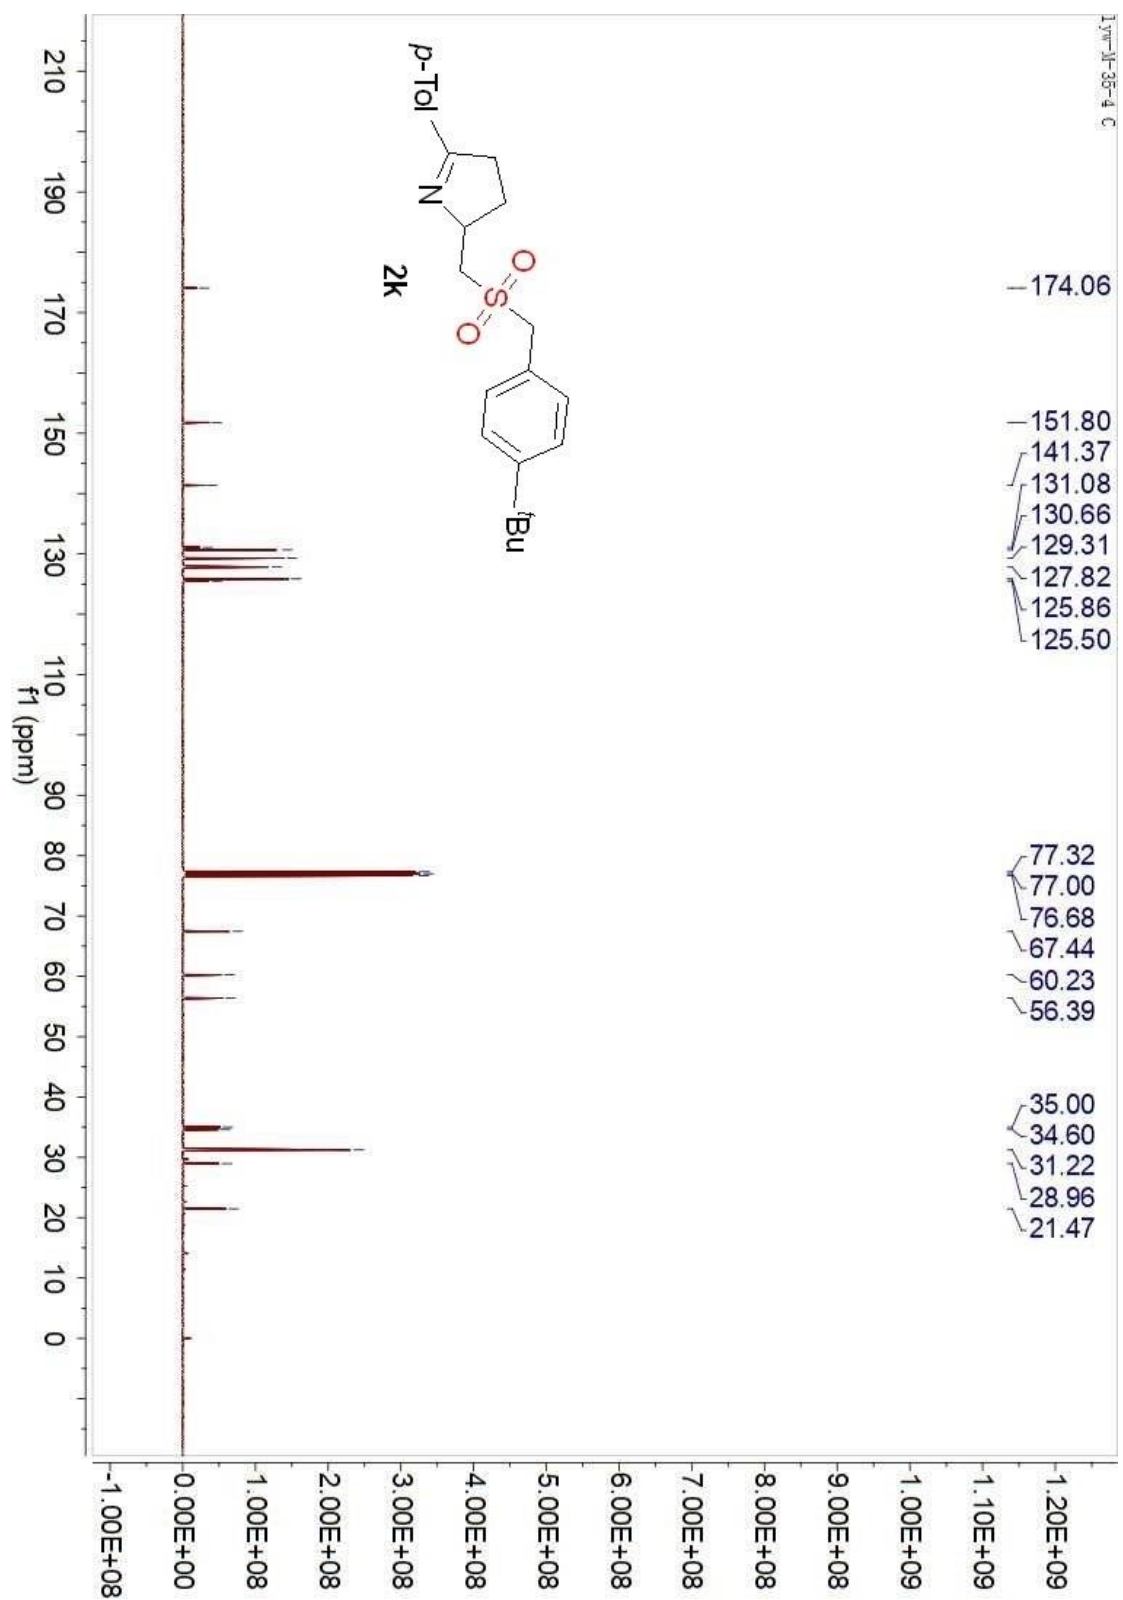



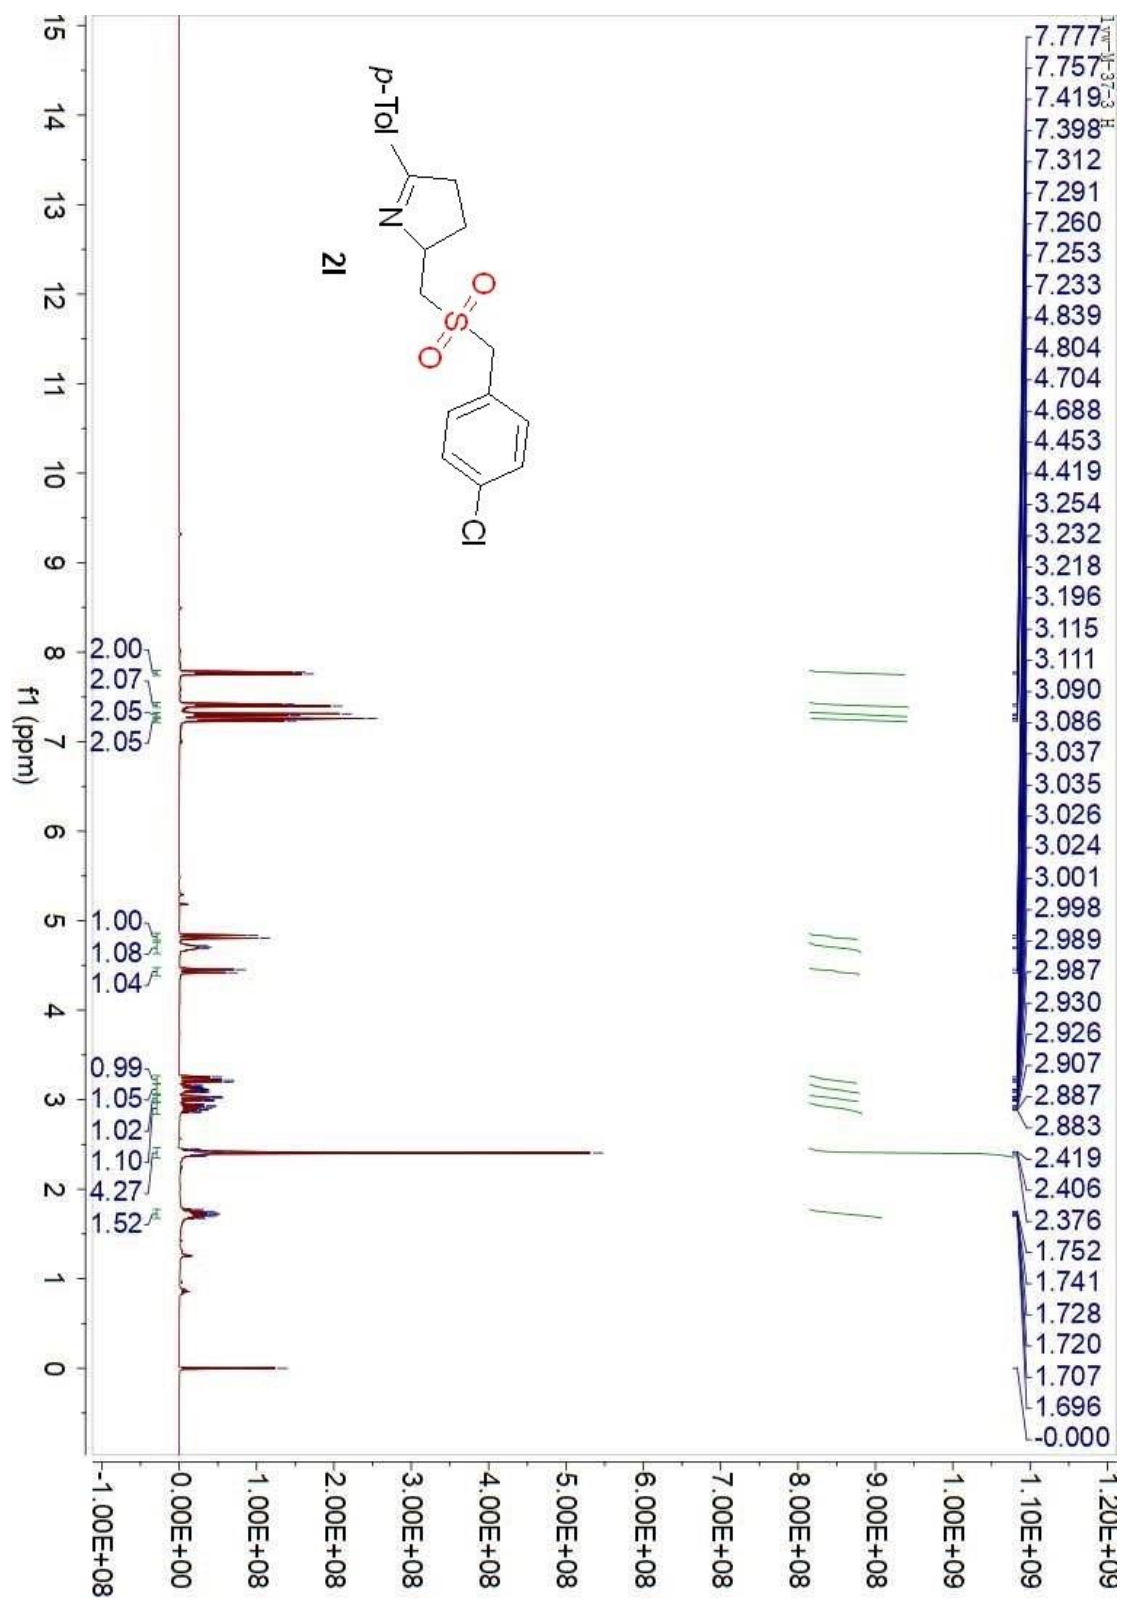

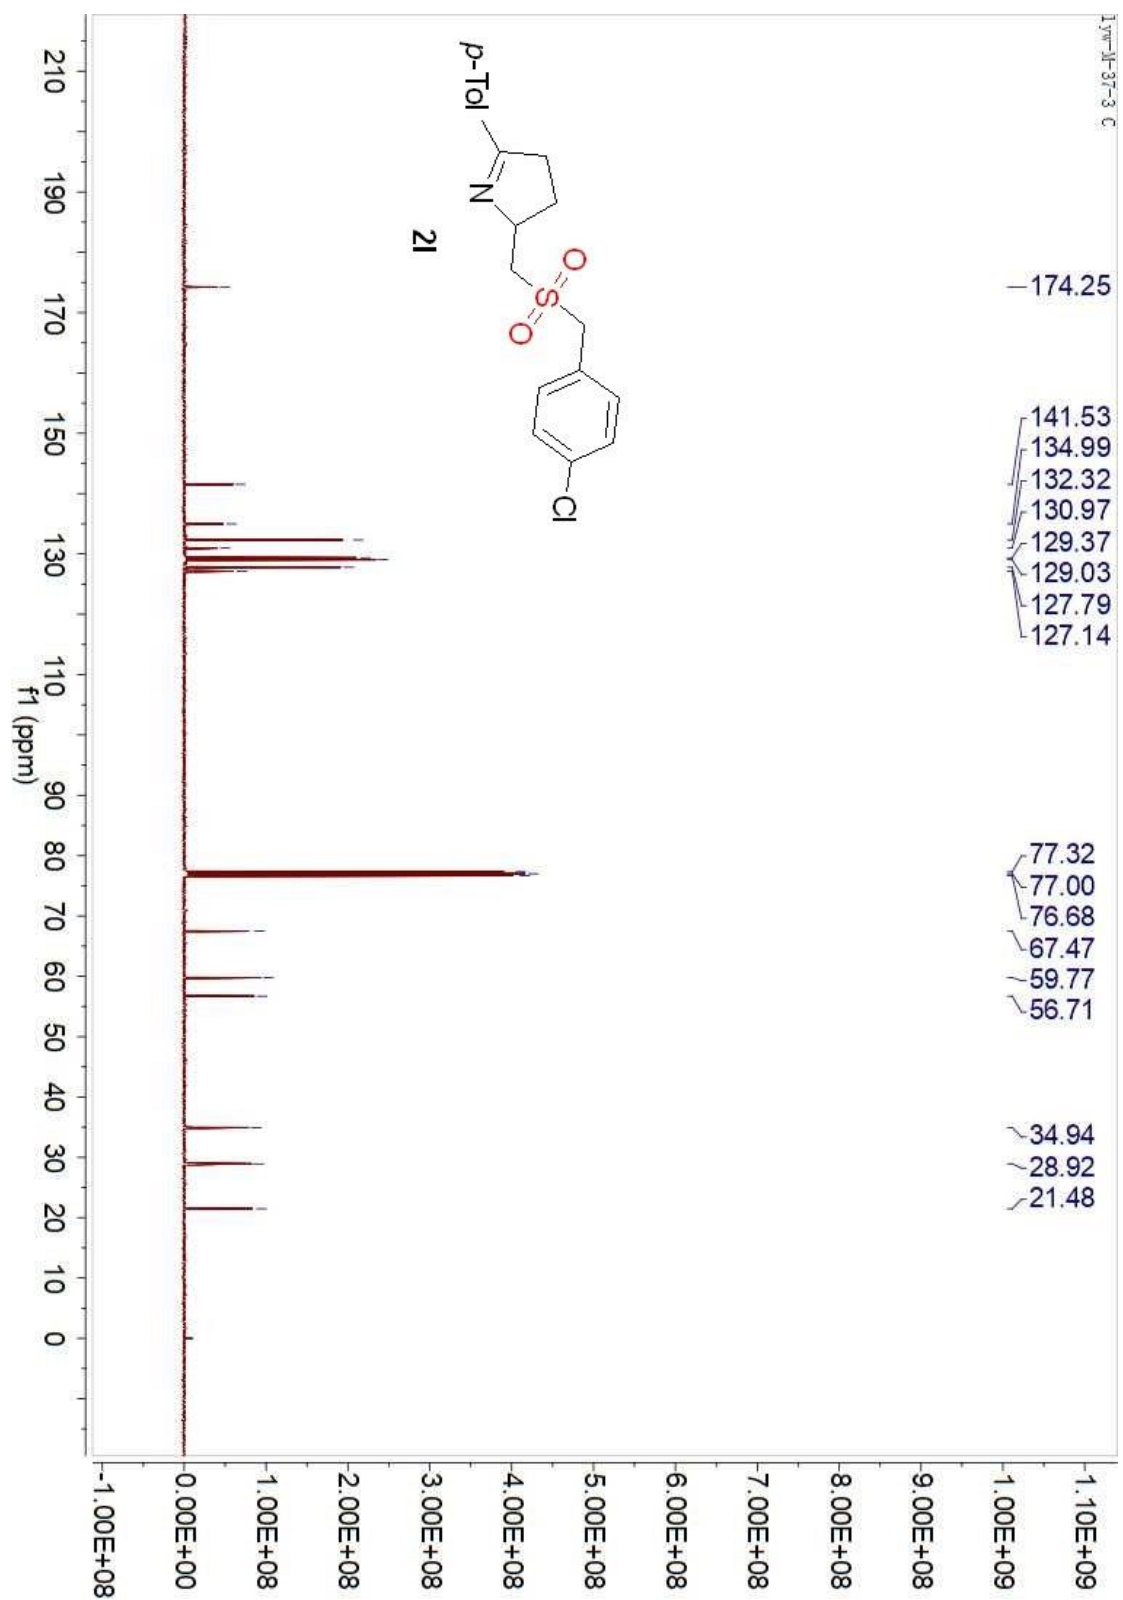

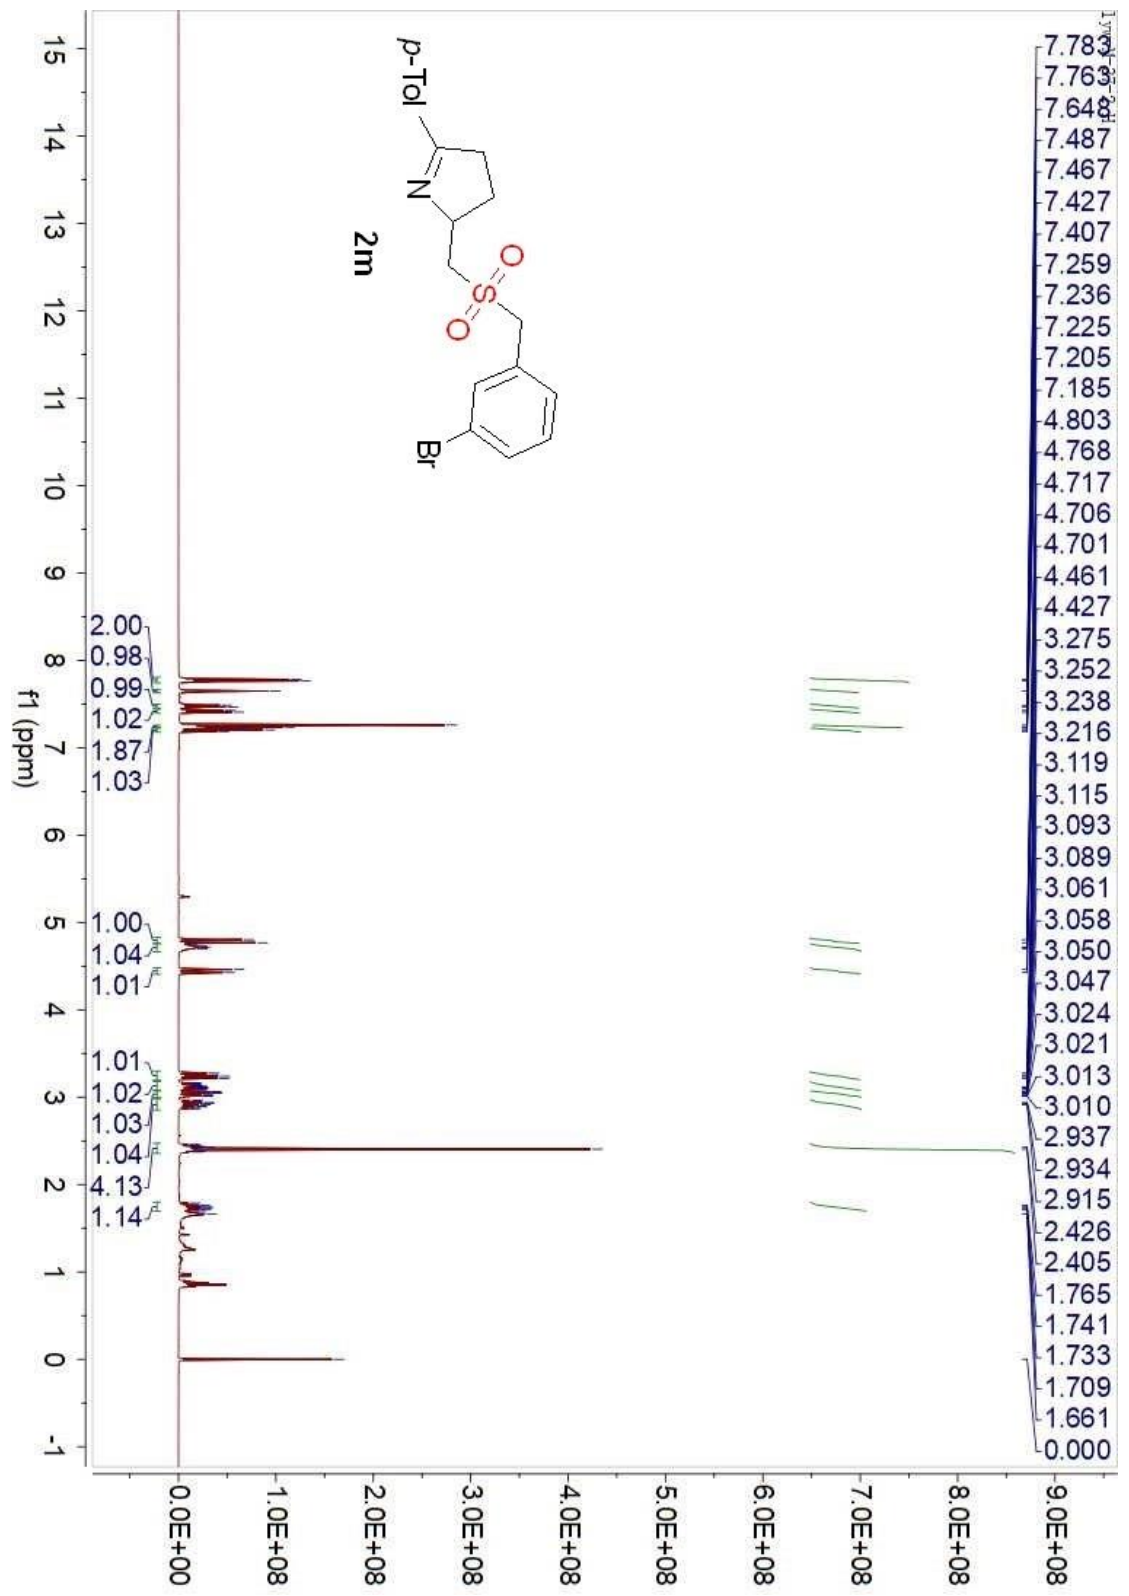

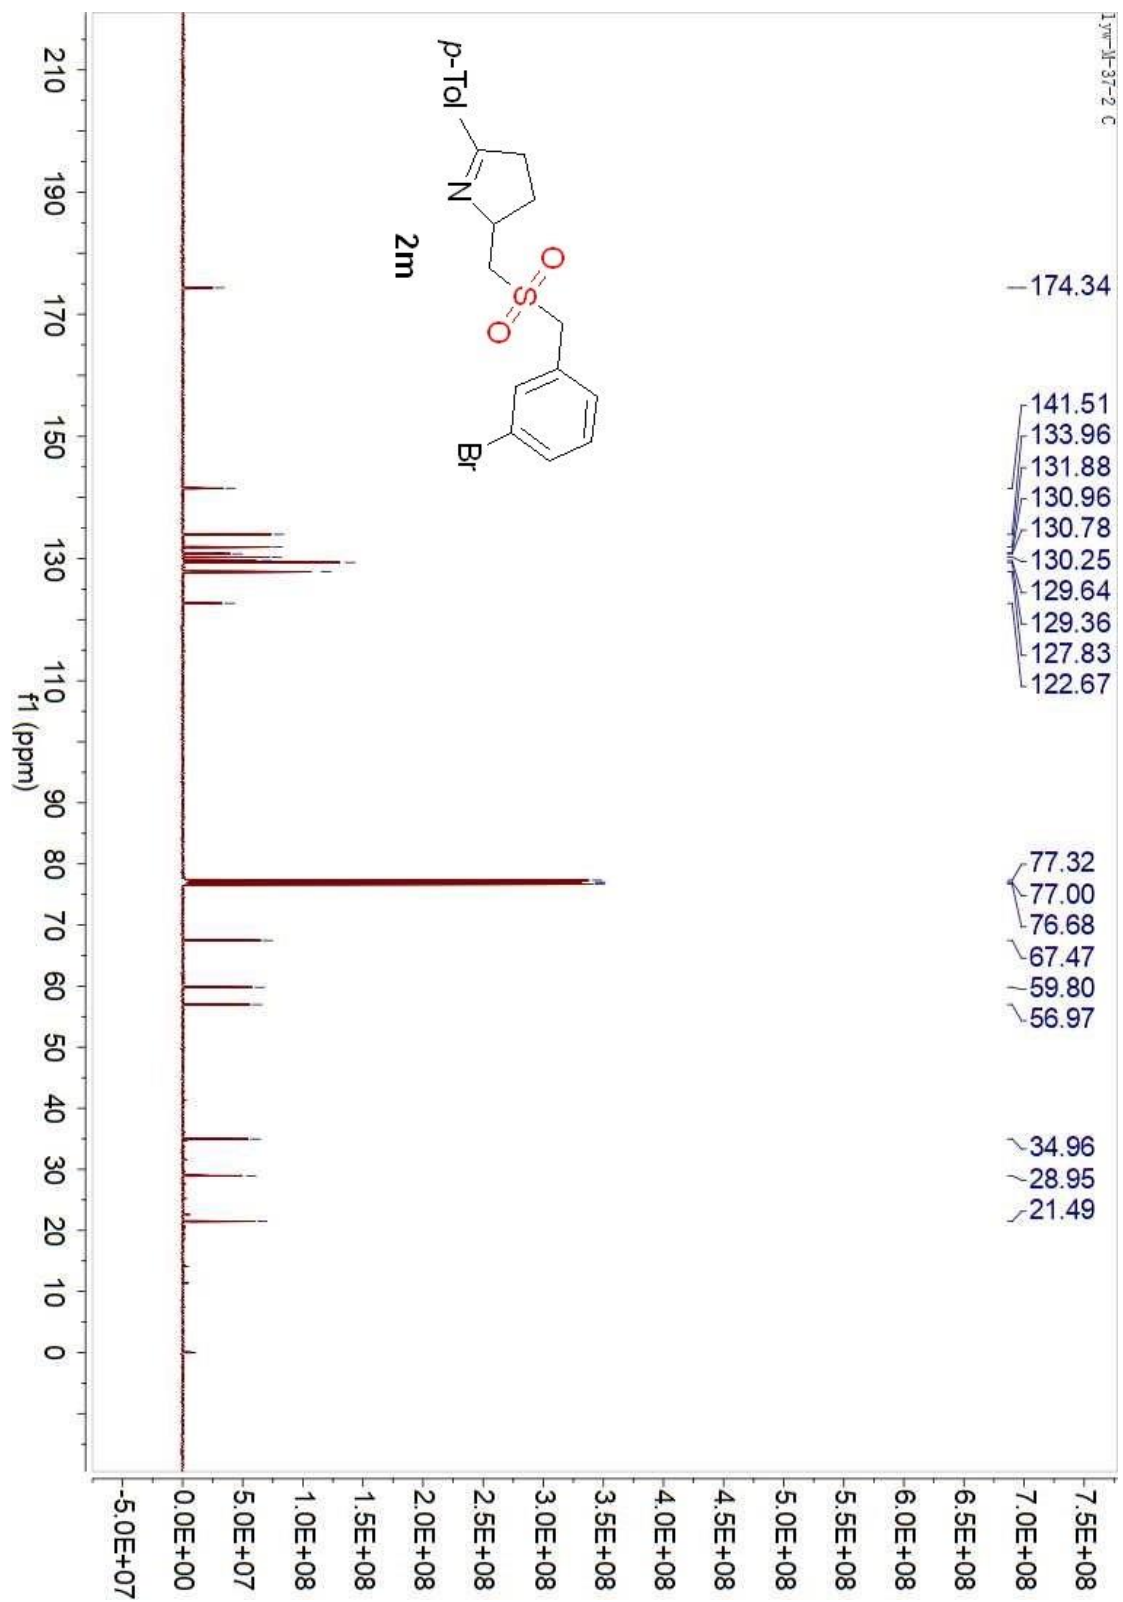

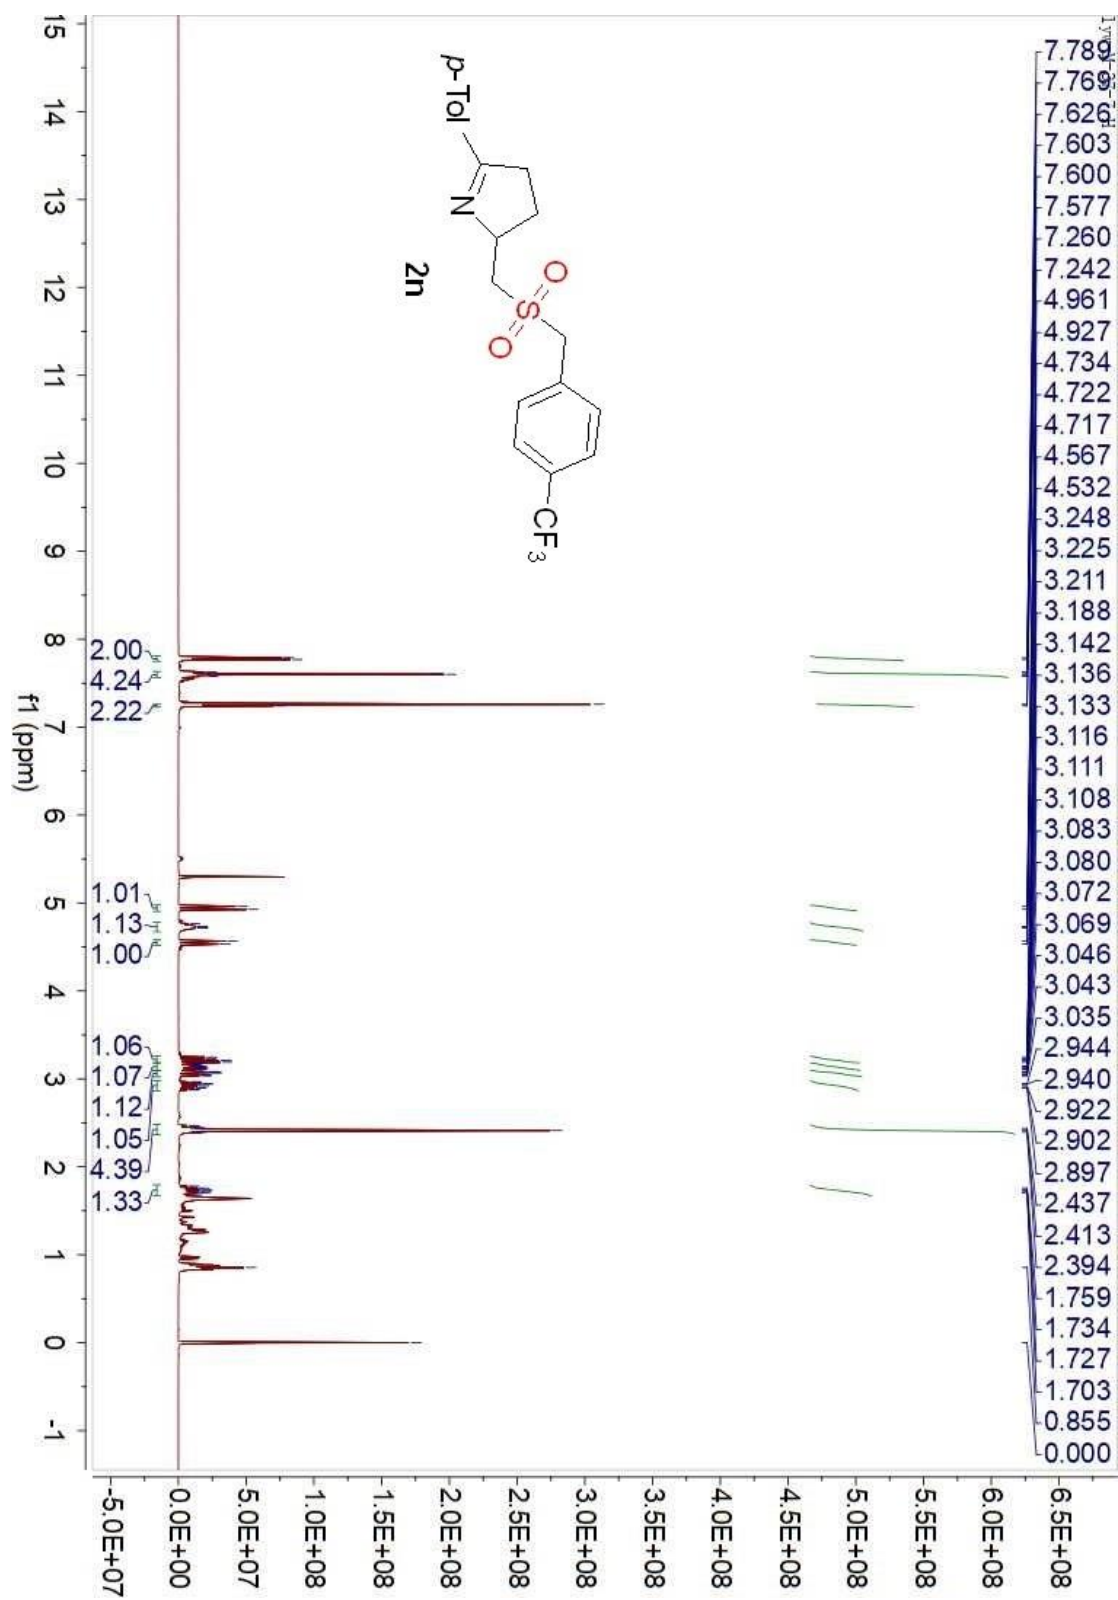

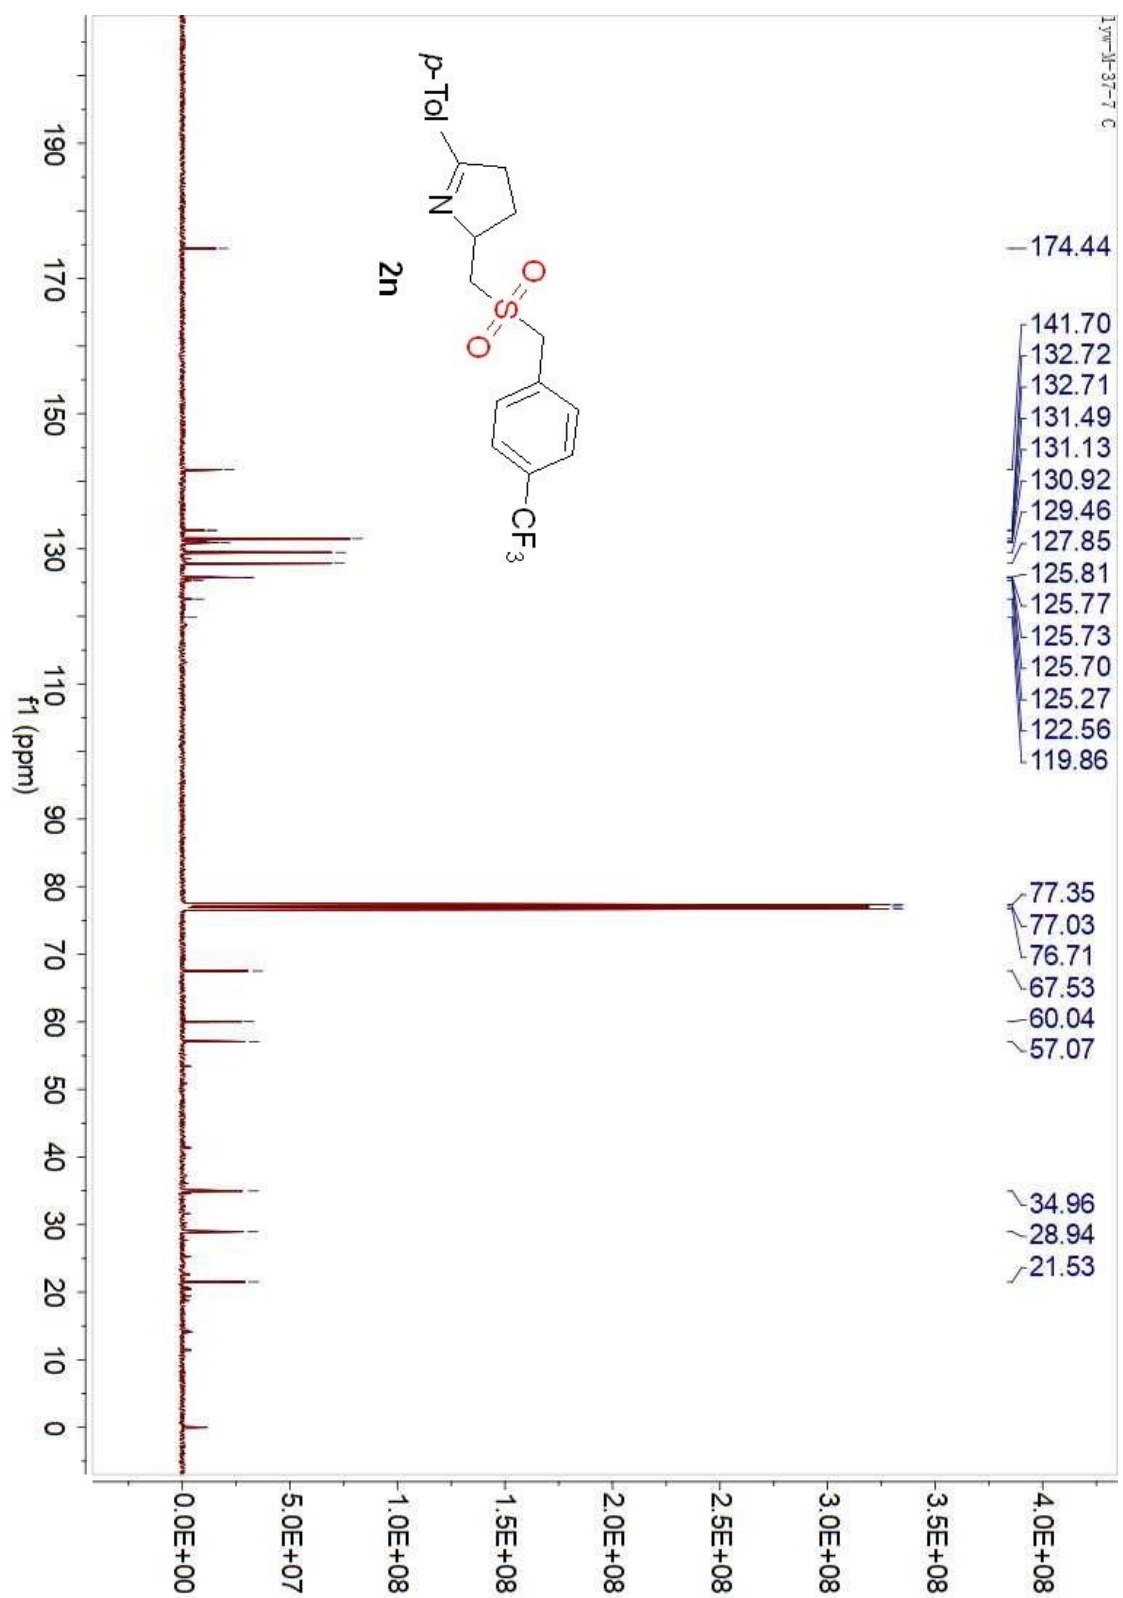



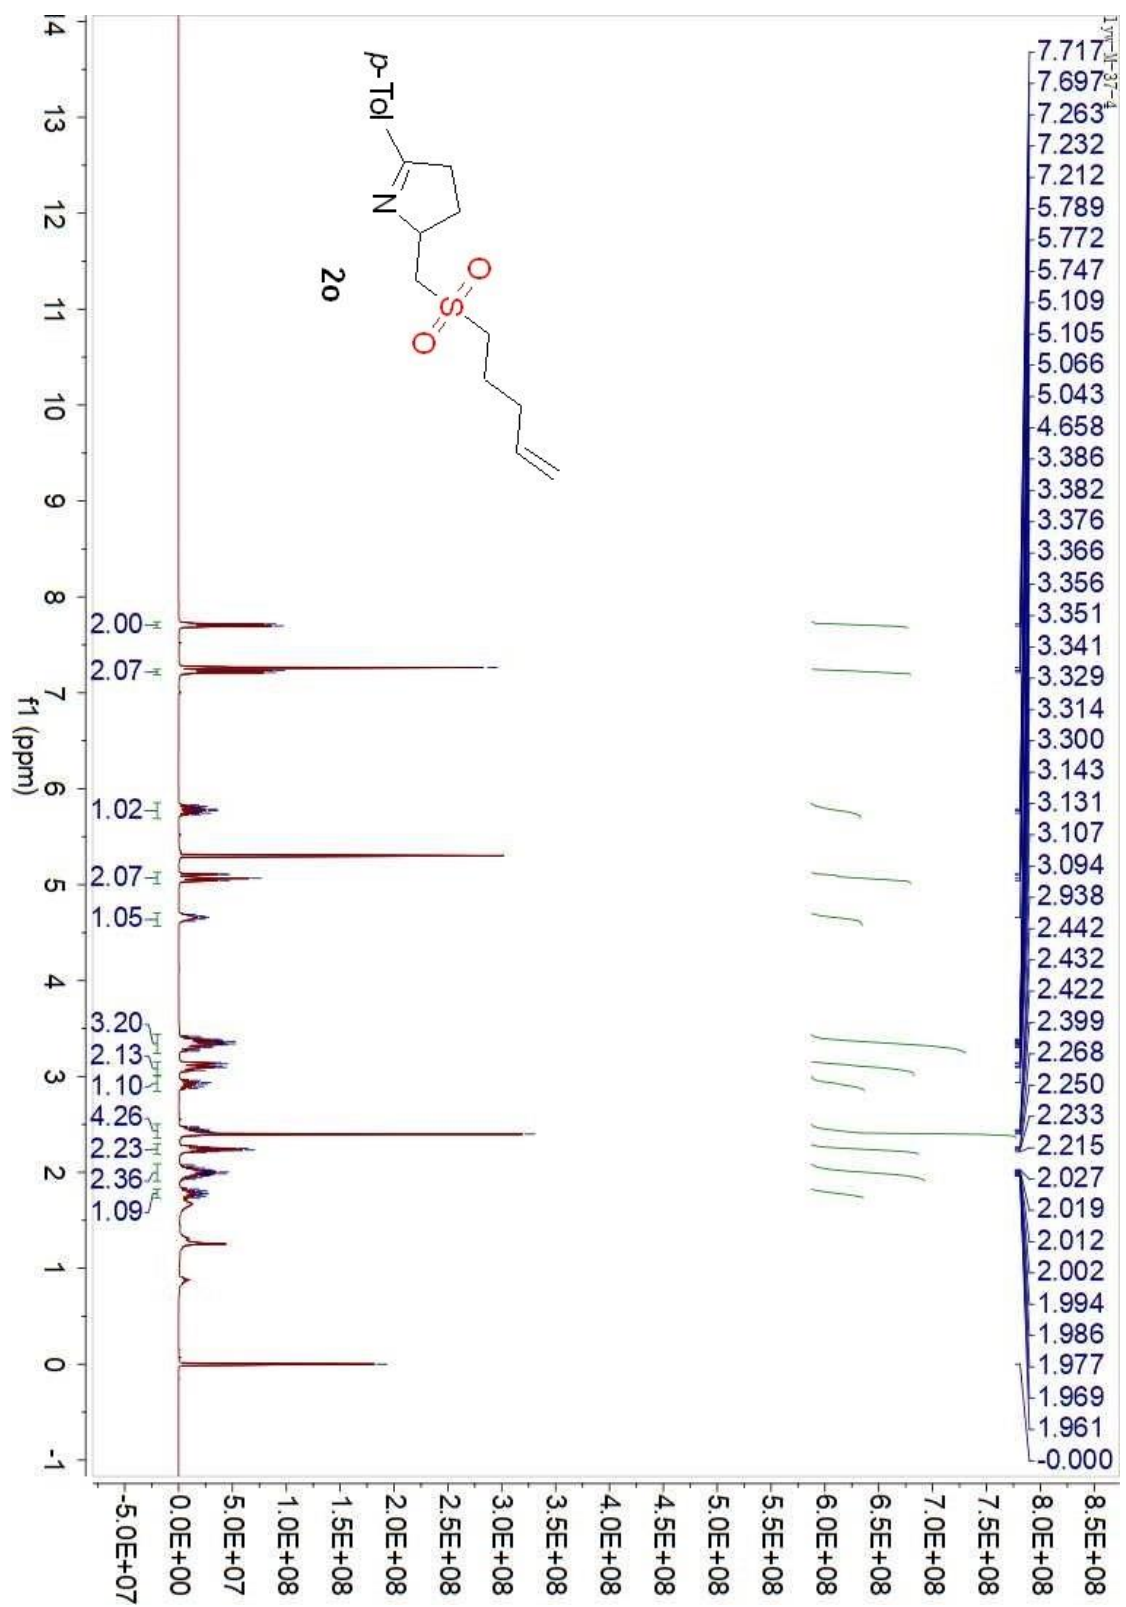

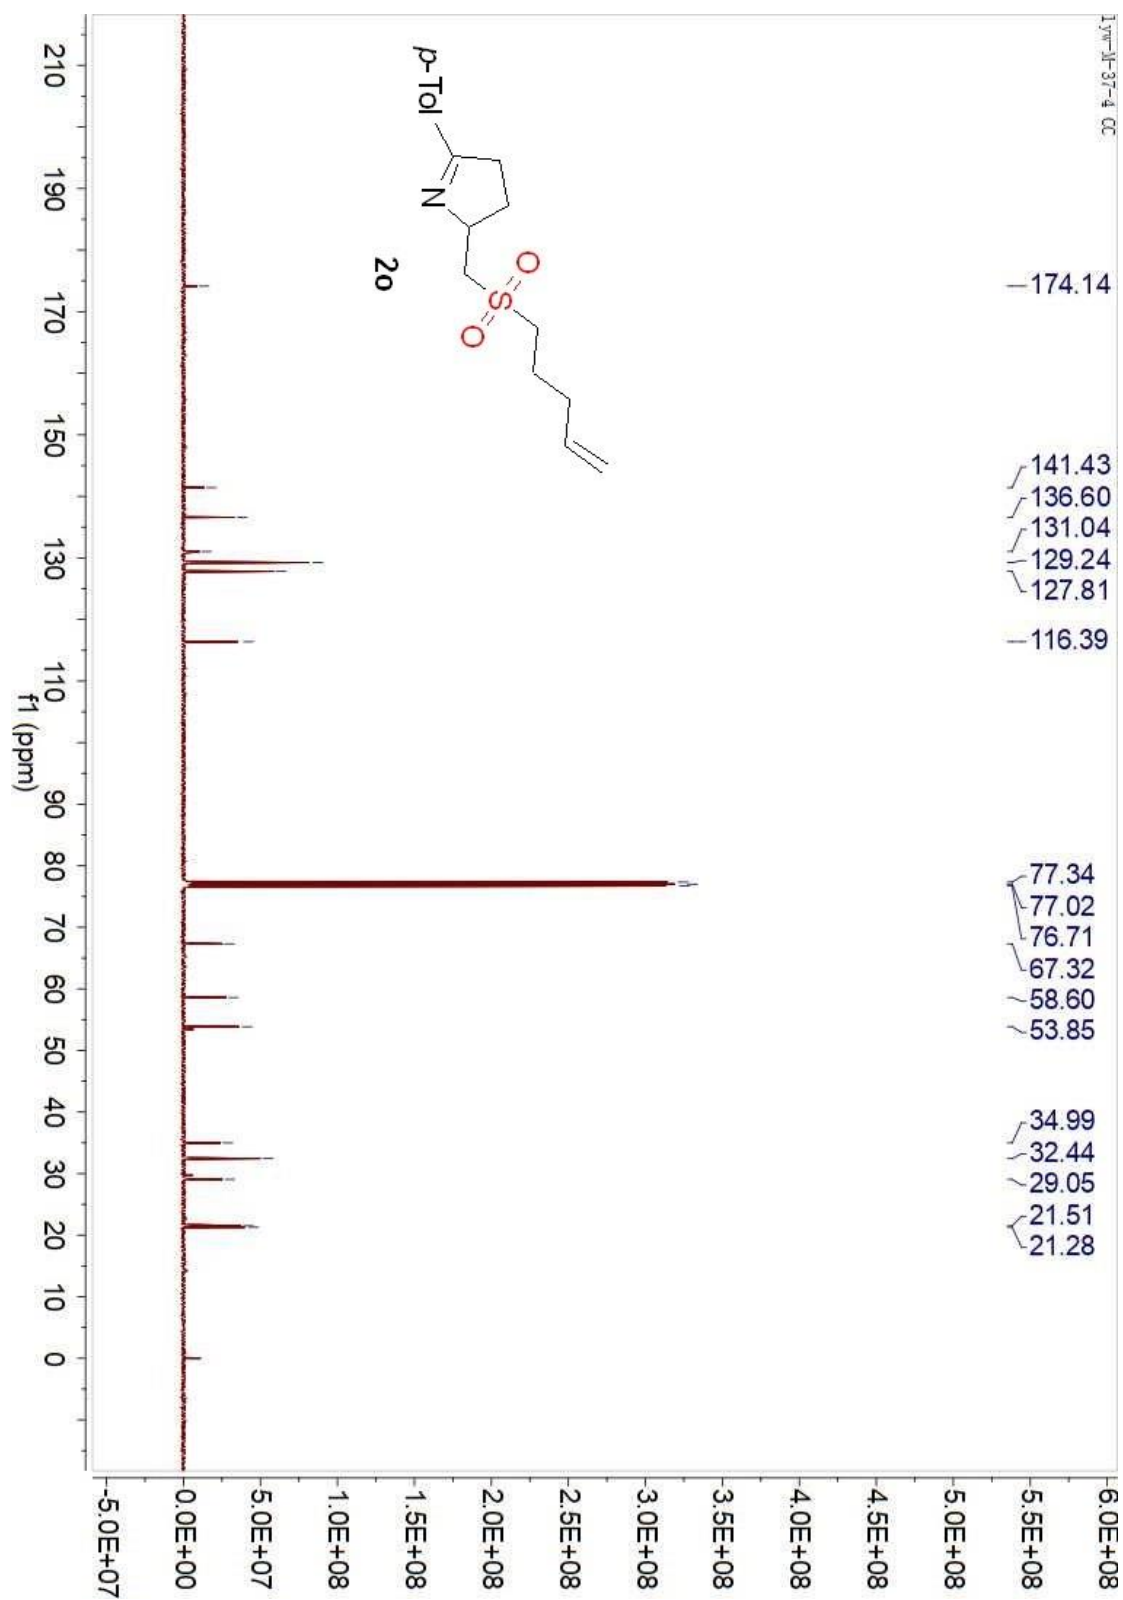



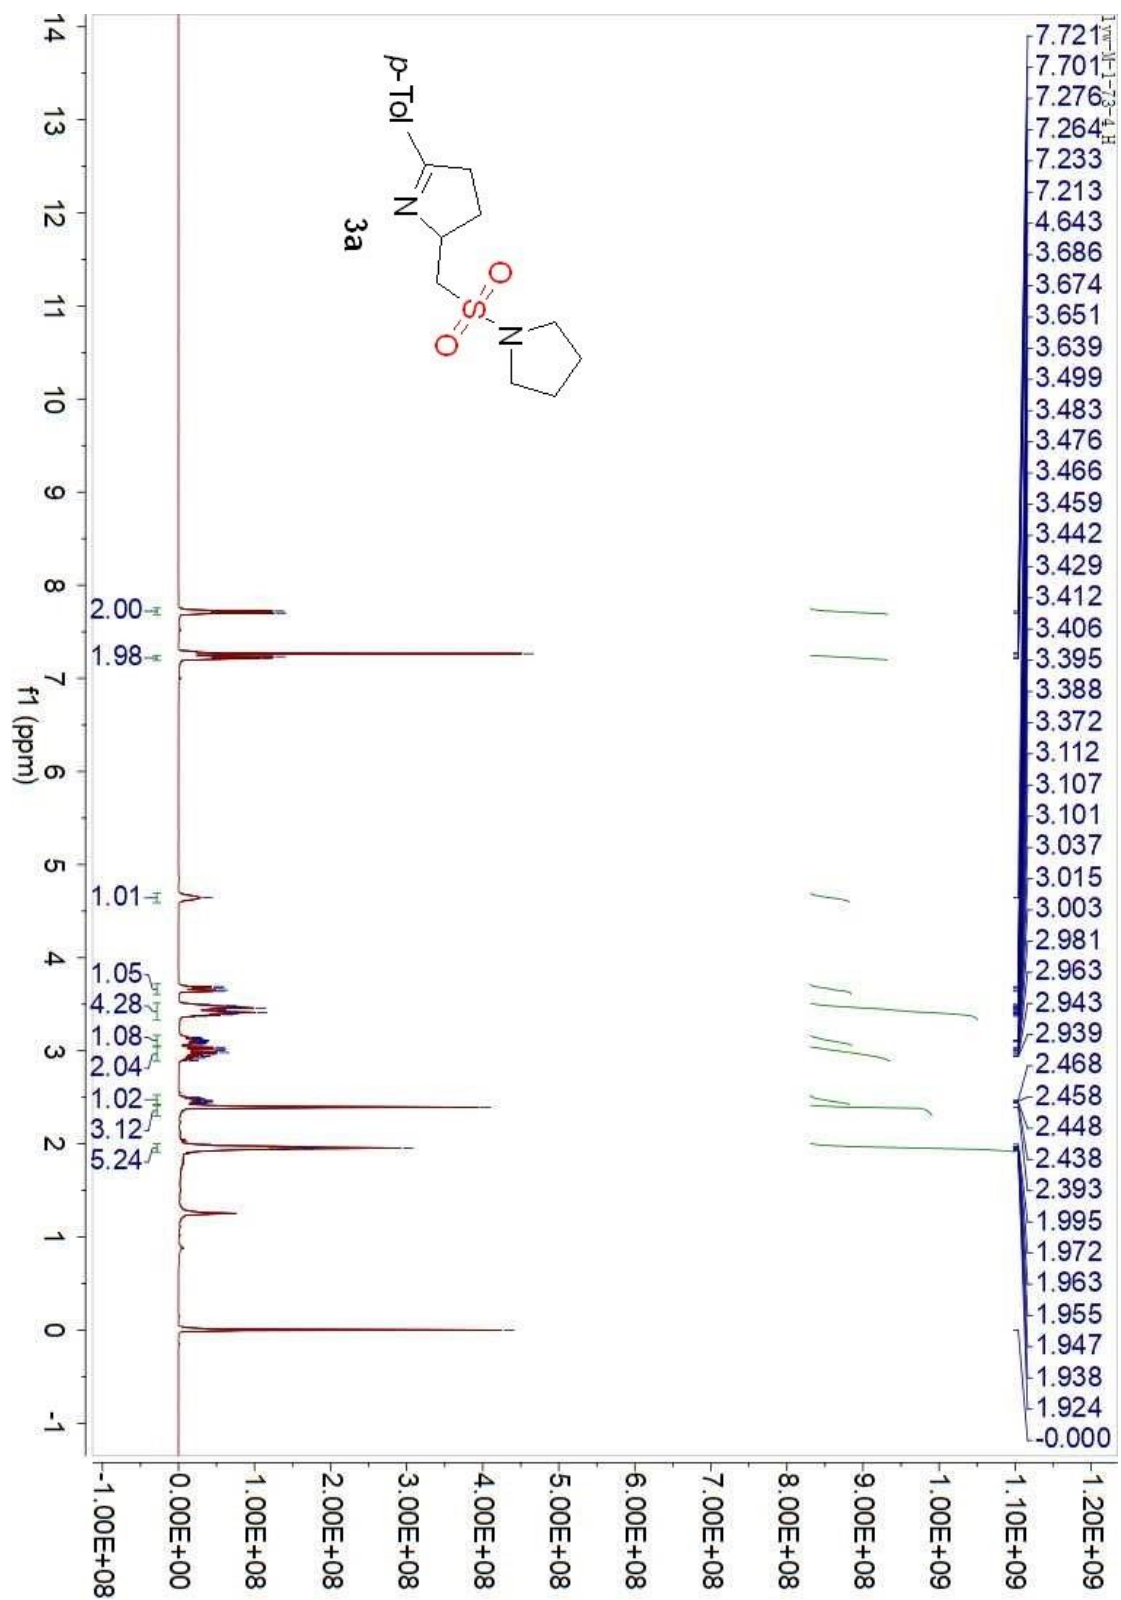

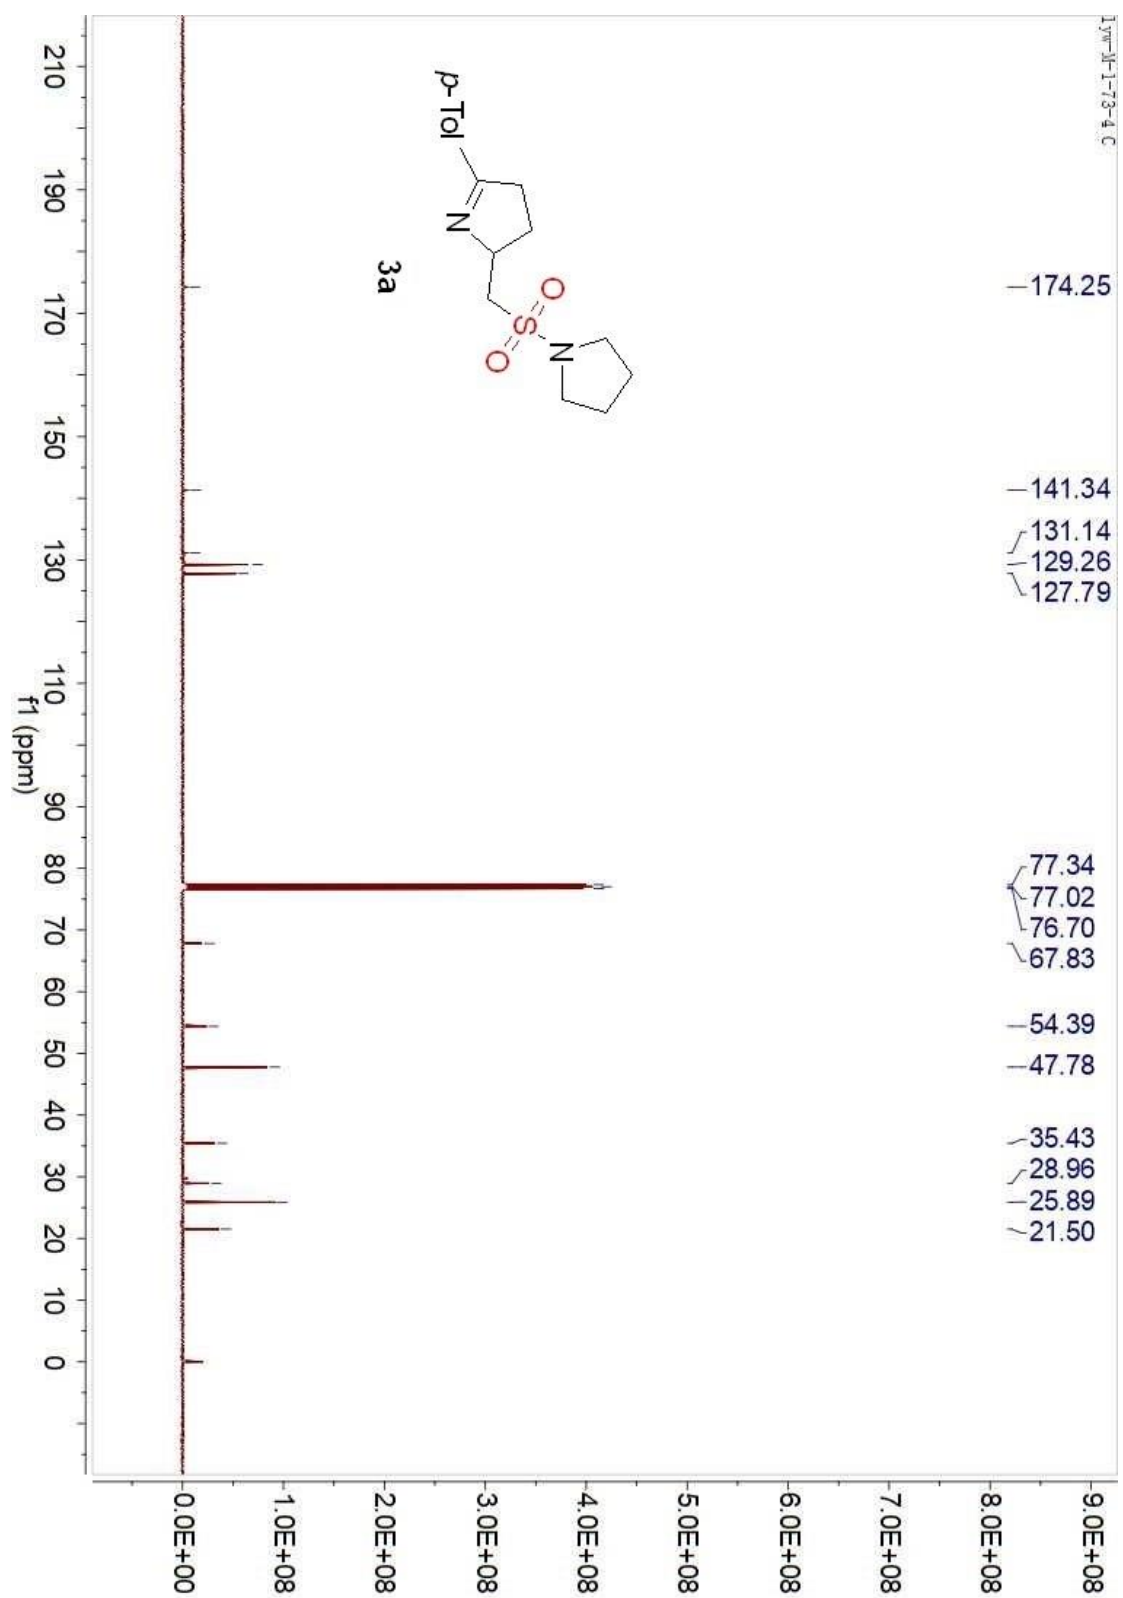

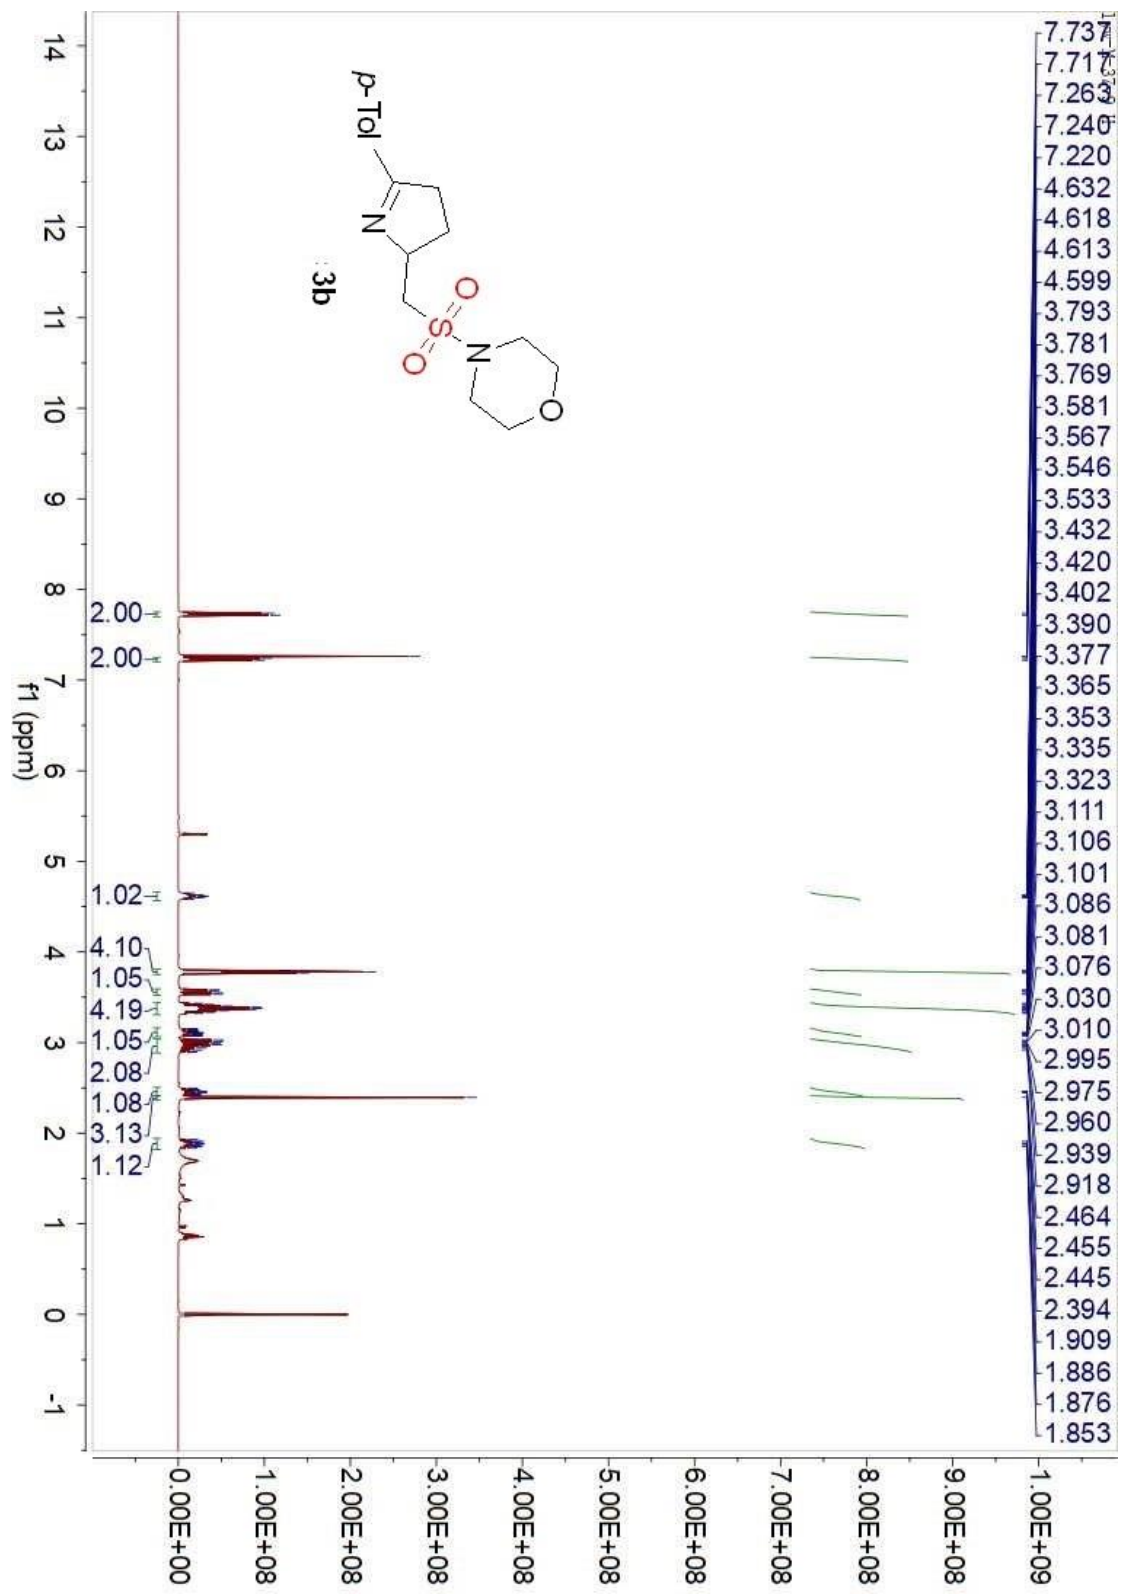

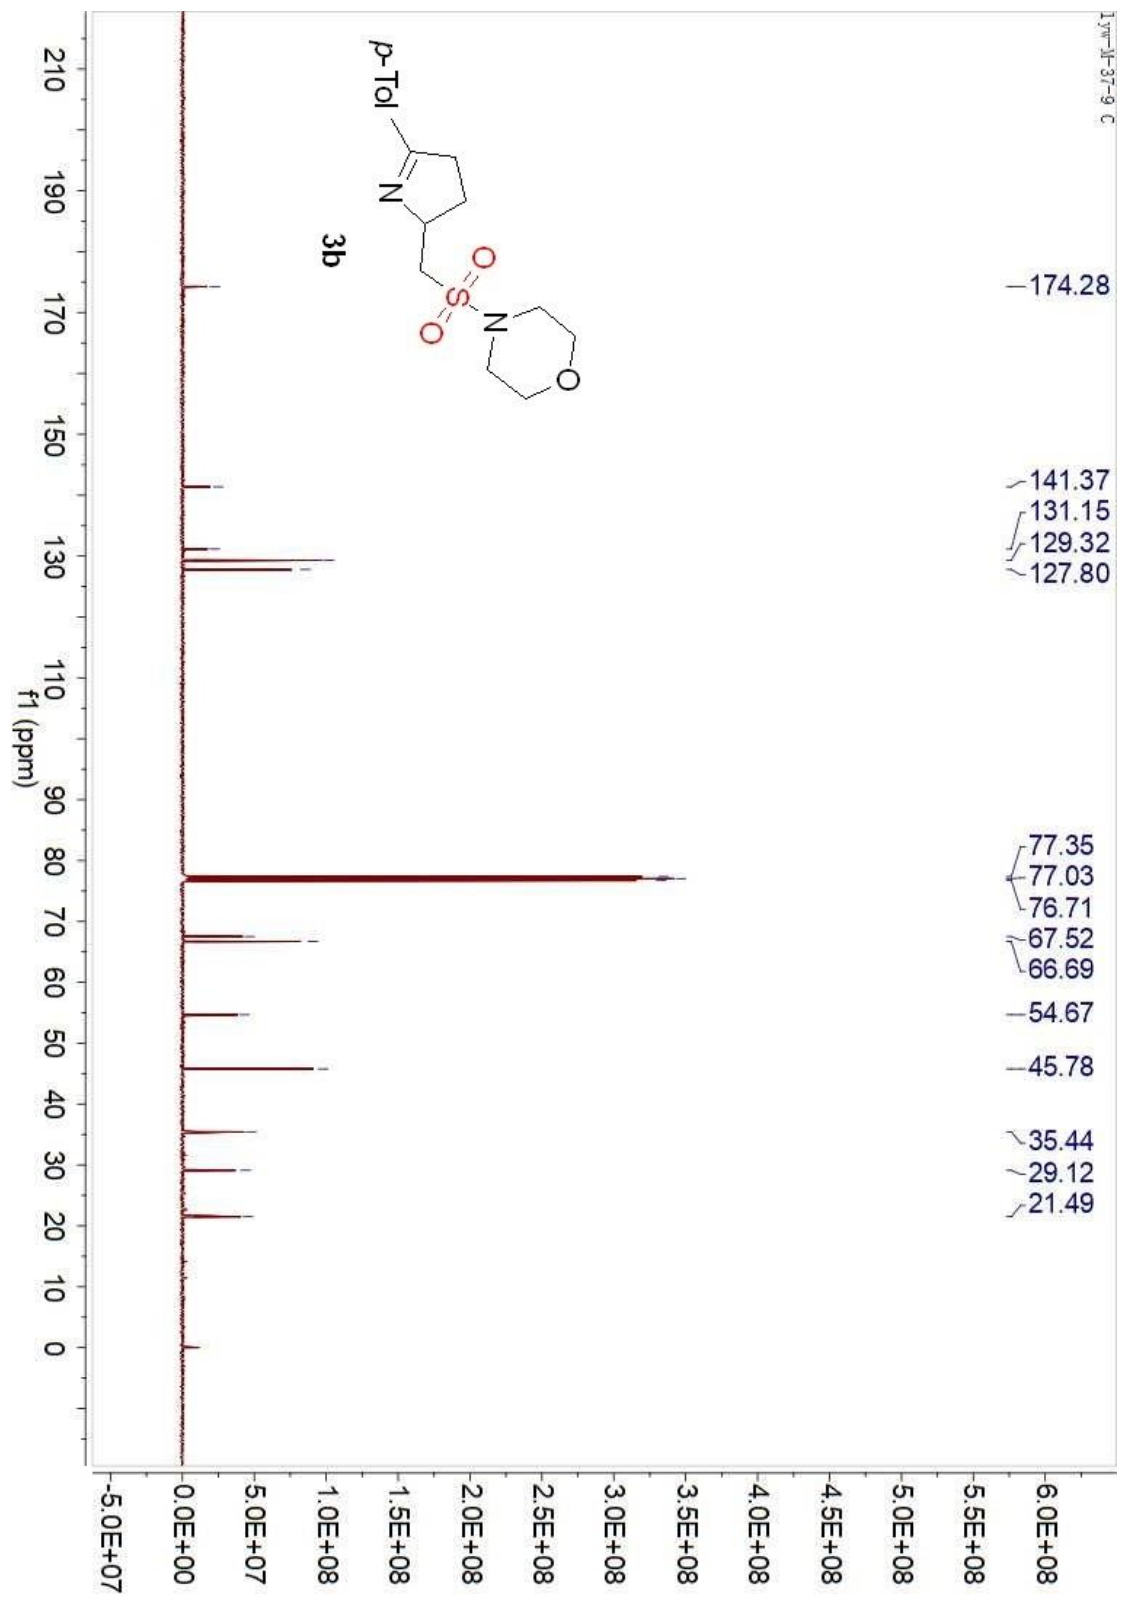

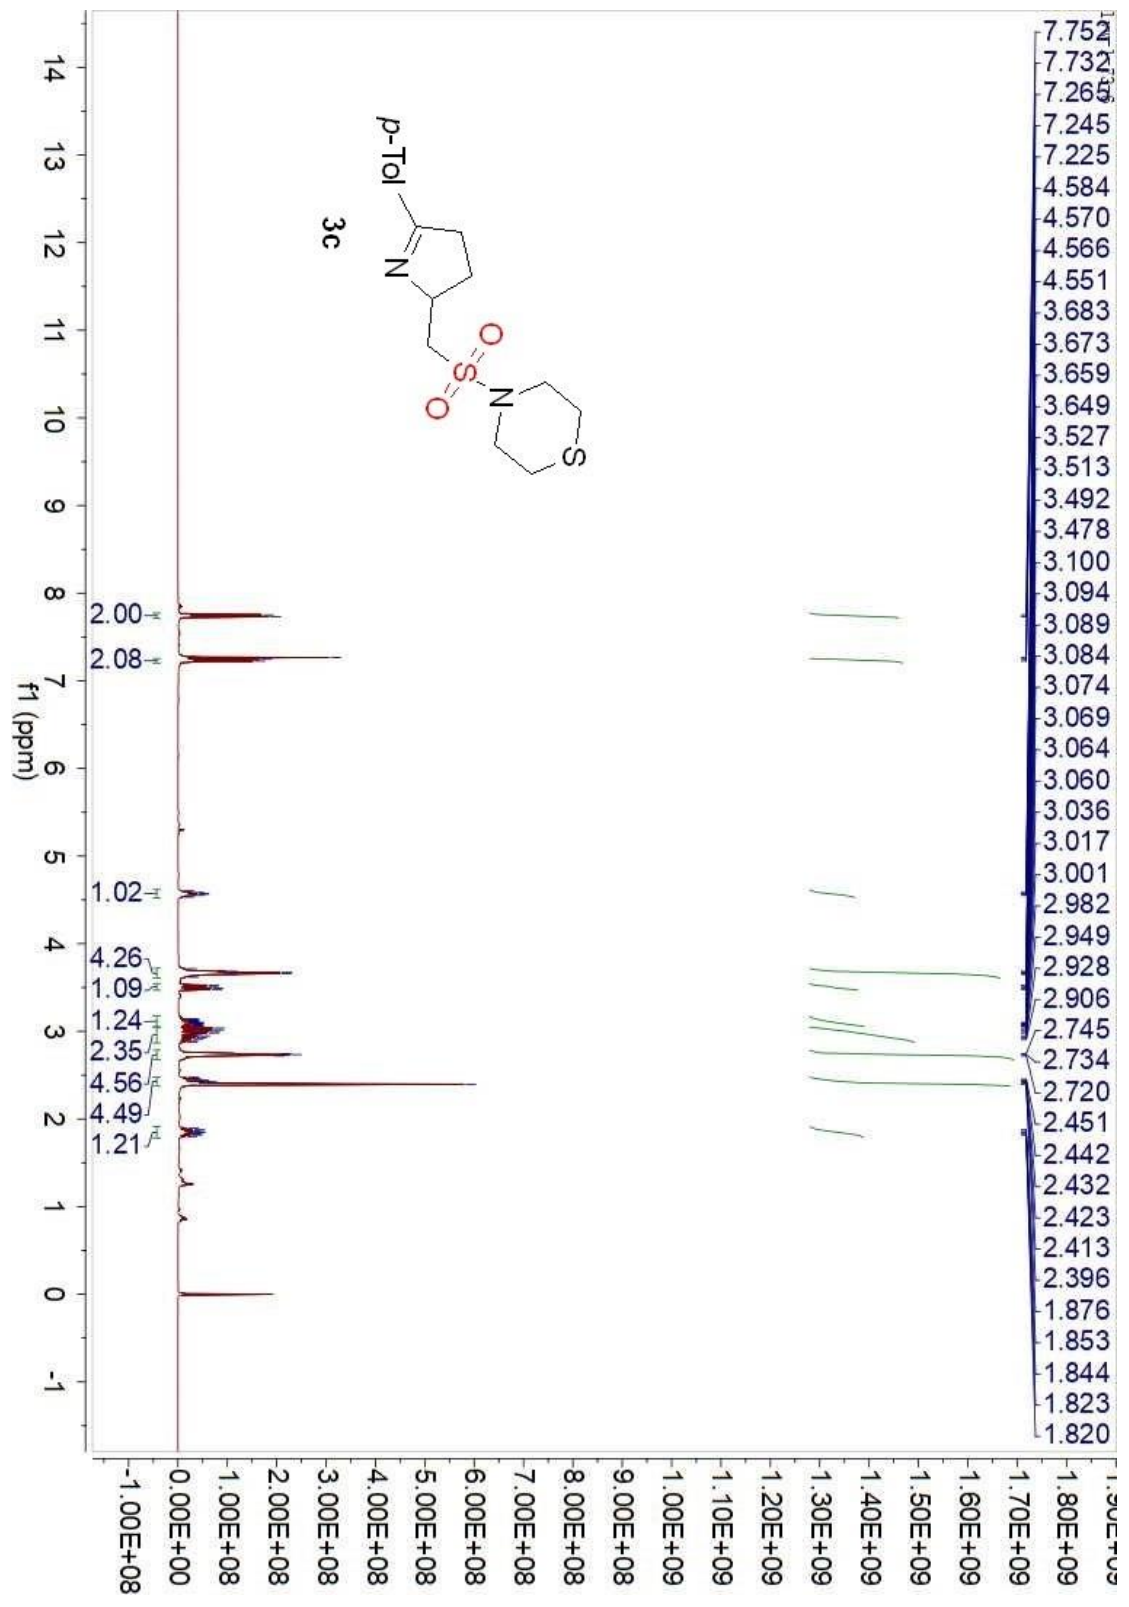

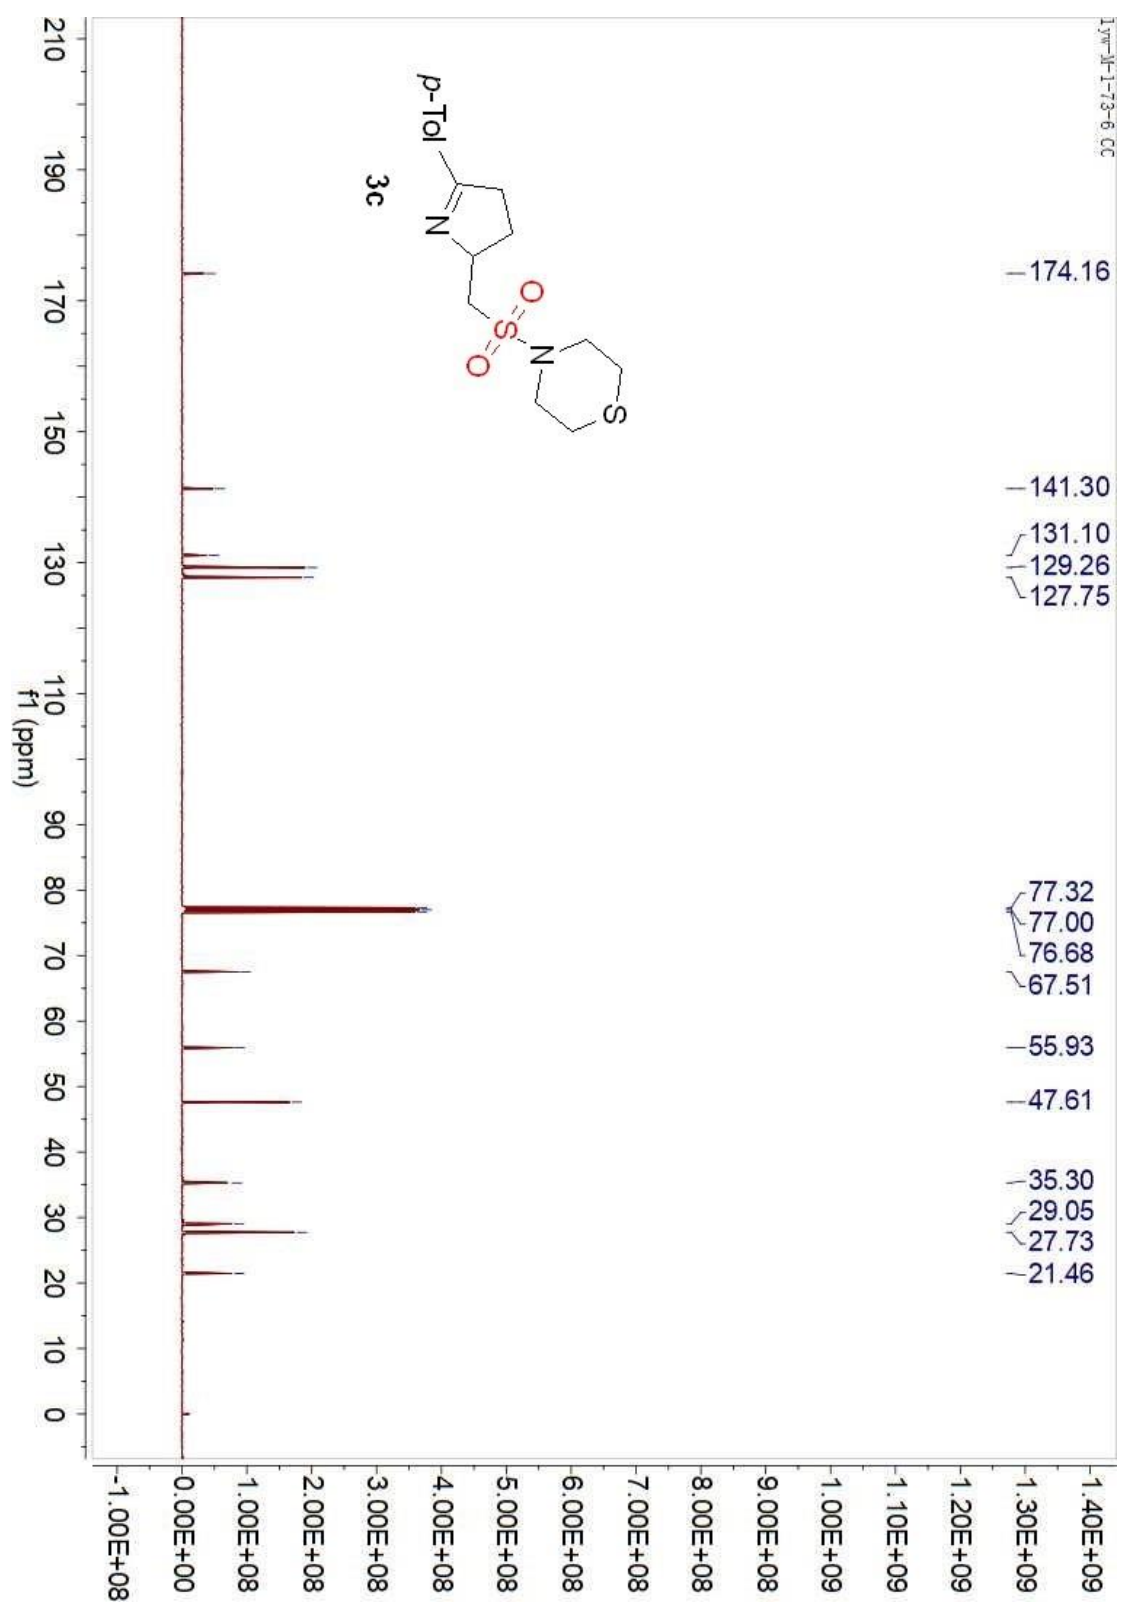

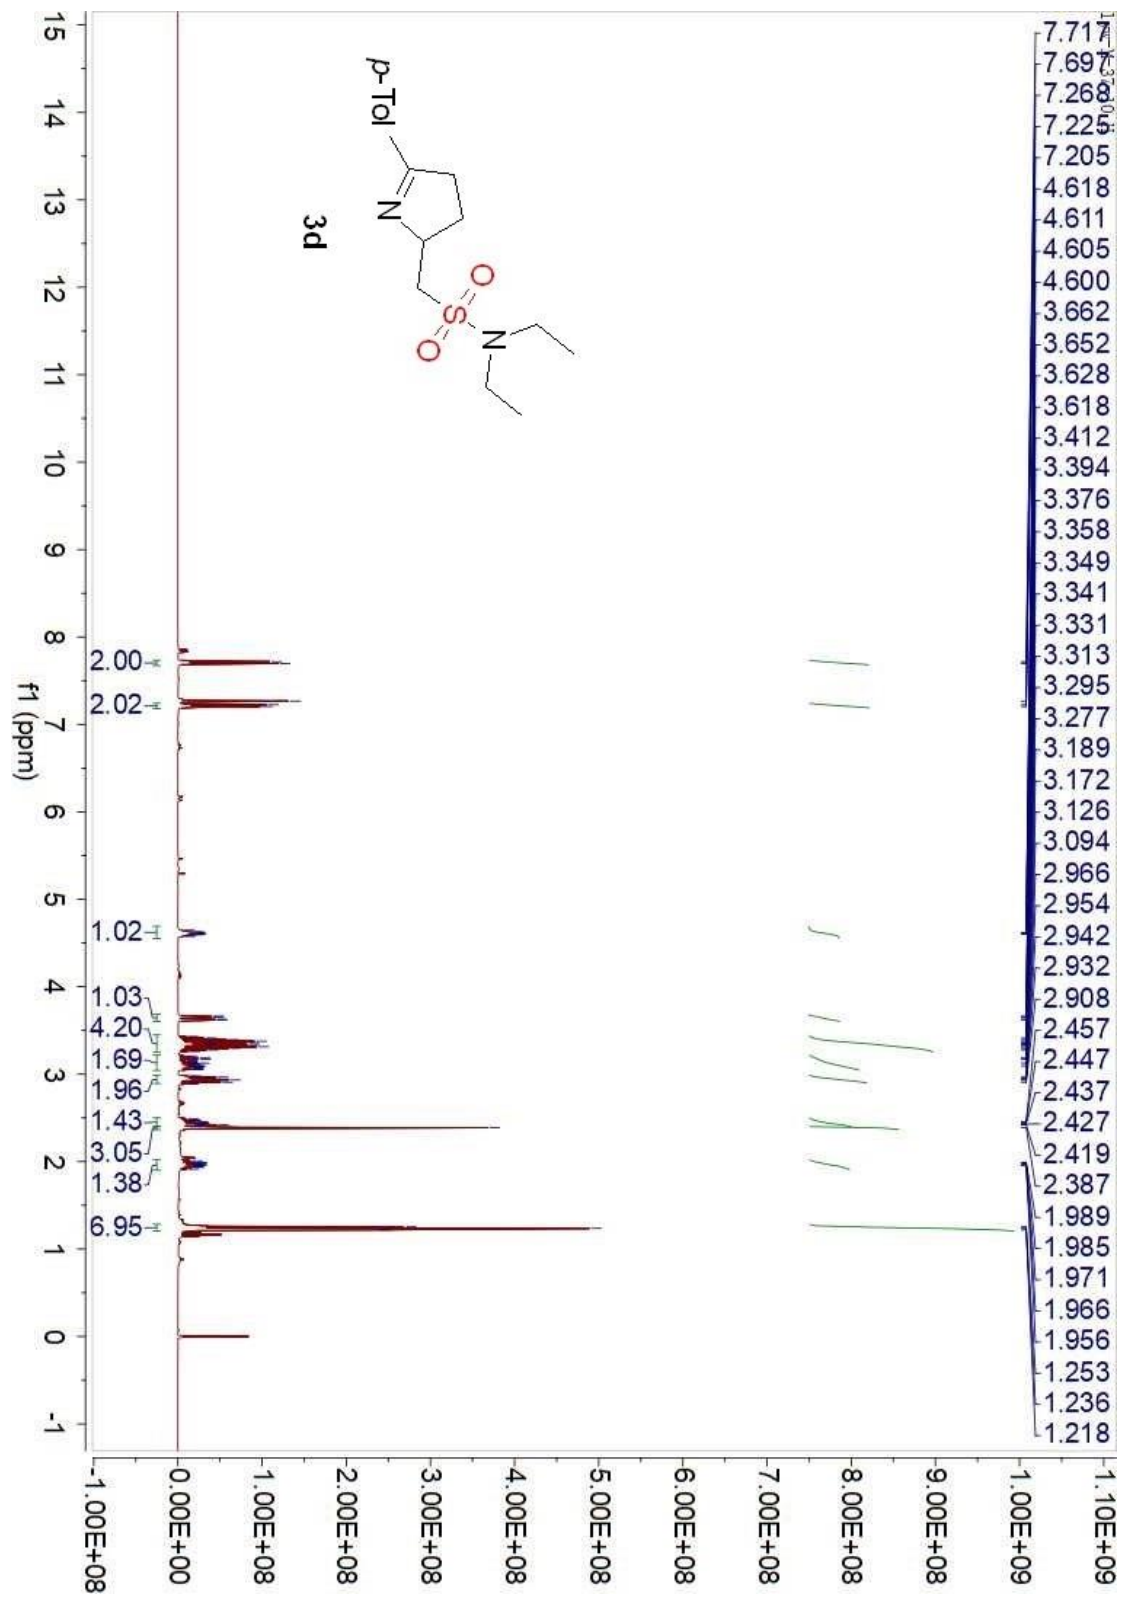



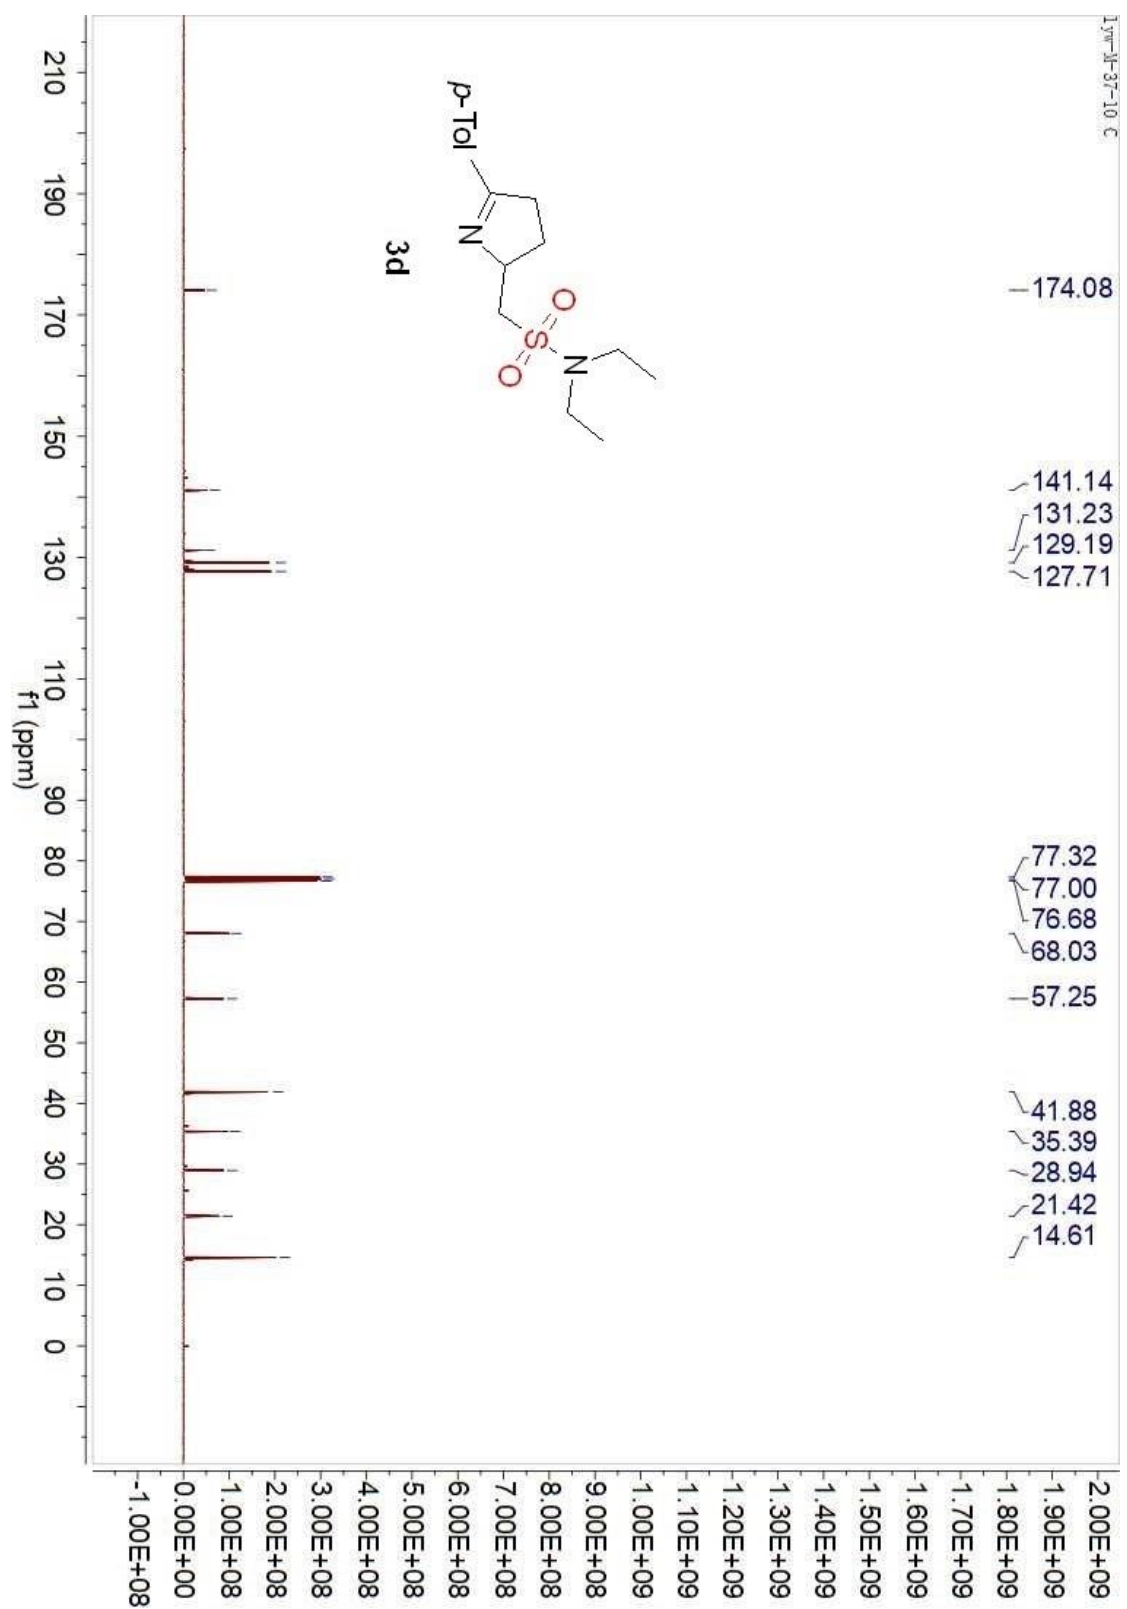

Supplement: d1qo00556a1.pdf [file d1qo00556a1.pdf]
